# Supplementary material for: Host density drives viral, but not trypanosome, transmission in a key pollinator
Source: Proc Biol Sci. 2020 Jan 8;287(1918):20191969. doi: 10.1098/rspb.2019.1969 (PMC7003466; doi:10.1098/rspb.2019.1969)
Supplement: ESM data files [file rspb20191969supp2.xlsx]

## Sheet: Coversheet
This file contains the datafiles to accompany the article "Host density drives viral, but not trypanosome, transmission in a key pollinator" by Bailes et al., found at https://doi.org/10.1098/rspb.2019.1969
Each tab contains an individual csv file with data used in the analyses described at accessed at https://gitlab.com/JakeColtman/bees-density-and-parasite-transmission
A description of the data files and the variables in the containing files are given below:
Bailesetal_datafile1_ESM.csv
Measured colony sizes (number of bees) over the duration of the experiment
Date = date estimation relates to; Colony = colony ID; TotalColSize = number of bees from the respective colony ID within the compartment; Comp = compartment ID; Tp = time point for colony size estimation (~2 Day intervals); Virus_Tp = matching timepoint for virus sampling (4 day intervals); InCorCol = number of bees from the respective colony ID which were counted within the natal colony; Flw_Tp…
Bailesetal_datafile2_ESM.csv
The number of floral units of each flower species recorded during quadrat surveys
Date = Date flower density was recorded; SamplePeriod = which period of the experiment was the record in (in blocks of 4 day intervals, 1 = just prior to the start of the experiment, 2 = within day 1-4 of the experiment…. 8 = within the last 4 days of the experiment); Compartment = compartment measurements taken within; Quad_type: Quad = full quadrat used for estimation, Sub-s = a portion of a qu…
Bailesetal_datafile3_ESM.csv
Data file containing the results of transect walks over the course of the experiment.
date = date transect survey was undertaken; comp = the compartment observations were made within; min = the minute of the 20 minute observation period observation refers to; bee = number on bees tag, where this was possible to record (um/unm = unmarked, wo/waxed over = wax on tag making it illegible; lost tag = un marked bee which has clearly lost their tag; ft = faint tag (the number was partial…
Bailesetal_datafile4_ESM.csv
The number of days until Crithidia was detected in the faeces of workers within each non-inoculated colony. Data represents scenario 1 where colony 3 becomes infected on day 10.
Colony = colony ID; Compartment = compartment colony located within; Dateinf = date on which Crithidia was first detected in the faeces of a worker TimeToInf = Number of days before Crithidia infection was detected; num_scr = number of workers screened within colony on day first detection of infection with Crithidia within the colony; num_inf = number of workers with Crithidia in their faeces on …
Bailesetal_datafile5_ESM.csv
The number of days until Crithidia was detected in the faeces of workers within each non-inoculated colony. Data represents scenario 2 where colony 3 becomes infected on day 12.
Colony = colony ID; Compartment = compartment colony located within; Dateinf = date on which Crithidia was first detected in the faeces of a worker TimeToInf = Number of days before Crithidia infection was detected; event = this column is used by the coxme model to indicate that the event occurred in the study period; Density = whether the compartment was assigned the high or low density treatmen…
Bailesetal_datafile6_ESM.csv
Results of the screening of workers for SBPV, including level of infection data.
X = row ID; comp = compartment colony located within; tp = point in experiment the sample was taken (4 day intervals, 0 = before colonies opened, 1 = 4 days…. 7 = day 28 [end of experiment]); col = colony ID; treat = treatment – whether the colony was inoculated or not at the start of the experiment. uninoc = not inoculated with parasites at start of experiment; Crithidia = Crithidia-inoculated a…
Bailesetal_datafile7_ESM.csv
Data on the drifting of workers to non-natal colonies over the duration of the experiment.
DateofSample = date observation relates to; SamplePoint = sample point (2 day intervals; Colony = Colony ID; Treatment = Crithidia = colony Crithidia-inoculated at the start of the experiment, SBPV = colony inoculated with SBPV at the start of the experiment, uninoc = colony had no detectable SBPV or Crithidia at the start of the experiment; TreatmentUI = as for Treatment except that uninoc colon…
Bailesetal_datafile8_ESM.xlsx
Look up table detailing how colony IDs relate to the colour code of marked bees, the inoculation treatment they were assigned and compartment location
no additional info.
Bailesetal_datafile9_ESM.csv
Screening results of samples tested for negative strand SBPV, an indication of active infection, by strand-specific qRT-PCR.
tp = point in experiment the sample was taken (4 day intervals, 0 = before colonies opened, 1 = 4 days…. 7 = day 28 [end of experiment]); col = colony ID; Bee = bee ID; type = treatment – whether the colony was inoculated or not at the start of the experiment. UNinoc = not inoculated with parasites SBPV at start of experiment; SBPV = SBPV-inoculated at the start of the experiment RTPCR_band_stren…

## Sheet: Bailesetal_datafile1_ESM.csv
Date	Colony	TotalColSize	Comp	Tp	Virus_Tp	InCorCol	Flw_Tp
2017-06-11	9	16	A	0	0	16	1
2017-06-11	20	16	A	0	0	16	1
2017-06-11	8	16	A	0	0	16	1
2017-06-11	7	16	B	0	0	16	1
2017-06-11	4	16	B	0	0	16	1
2017-06-11	5	16	B	0	0	16	1
2017-06-11	37	13	B	0	0	13	1
2017-06-11	12	13	B	0	0	13	1
2017-06-11	32	16	B	0	0	16	1
2017-06-11	6	16	C	0	0	16	1
2017-06-11	10	16	C	0	0	16	1
2017-06-11	11	16	C	0	0	16	1
2017-06-11	29	16	D	0	0	16	1
2017-06-11	13	12	D	0	0	12	1
2017-06-11	14	15	D	0	0	15	1
2017-06-11	15	16	D	0	0	16	1
2017-06-11	16	16	D	0	0	16	1
2017-06-11	30	16	D	0	0	16	1
2017-06-11	28	16	E	0	0	16	1
2017-06-11	19	16	E	0	0	16	1
2017-06-11	35	16	E	0	0	16	1
2017-06-11	22	16	F	0	0	16	1
2017-06-11	3	10	F	0	0	10	1
2017-06-11	17	13	F	0	0	13	1
2017-06-11	23	16	F	0	0	16	1
2017-06-11	26	16	F	0	0	16	1
2017-06-11	24	16	F	0	0	16	1
2017-06-13	9	18	A	1	0.5	16	2
2017-06-13	20	13	A	1	0.5	13	2
2017-06-13	8	13	A	1	0.5	13	2
2017-06-13	7	17	B	1	0.5	14	2
2017-06-13	4	15	B	1	0.5	12	2
2017-06-13	5	16	B	1	0.5	12	2
2017-06-13	37	11	B	1	0.5	10	2
2017-06-13	12	14	B	1	0.5	14	2
2017-06-13	32	11	B	1	0.5	7	2
2017-06-13	6	20	C	1	0.5	20	2
2017-06-13	10	12	C	1	0.5	11	2
2017-06-13	11	15	C	1	0.5	14	2
2017-06-13	29	19	D	1	0.5	18	2
2017-06-13	13	14	D	1	0.5	13	2
2017-06-13	14	15	D	1	0.5	15	2
2017-06-13	15	22	D	1	0.5	19	2
2017-06-13	16	18	D	1	0.5	17	2
2017-06-13	30	18	D	1	0.5	18	2
2017-06-13	28	10	E	1	0.5	8	2
2017-06-13	19	14	E	1	0.5	14	2
2017-06-13	35	12	E	1	0.5	11	2
2017-06-13	22	13	F	1	0.5	12	2
2017-06-13	3	8	F	1	0.5	8	2
2017-06-13	17	11	F	1	0.5	10	2
2017-06-13	23	12	F	1	0.5	11	2
2017-06-13	26	13	F	1	0.5	11	2
2017-06-13	24	13	F	1	0.5	11	2
2017-06-15	9	17	A	1	0.5	17	2
2017-06-15	20	20	A	2	1	20	2
2017-06-15	8	10	A	2	1	10	2
2017-06-15	7	16	B	2	1	13	2
2017-06-15	4	16	B	2	1	12	2
2017-06-15	5	14	B	2	1	11	2
2017-06-15	37	11	B	2	1	9	2
2017-06-15	12	10	B	2	1	10	2
2017-06-15	32	11	B	2	1	6	2
2017-06-15	6	14	C	2	1	13	2
2017-06-15	10	13	C	2	1	13	2
2017-06-15	11	16	C	2	1	15	2
2017-06-15	29	23	D	2	1	22	2
2017-06-15	13	17	D	2	1	14	2
2017-06-15	14	16	D	2	1	15	2
2017-06-15	15	27	D	2	1	22	2
2017-06-15	16	17	D	2	1	15	2
2017-06-15	30	18	D	2	1	17	2
2017-06-15	28	12	E	2	1	11	2
2017-06-15	19	16	E	2	1	16	2
2017-06-15	35	15	E	2	1	14	2
2017-06-15	22	15	F	2	1	11	2
2017-06-15	3	10	F	2	1	10	2
2017-06-15	17	15	F	2	1	12	2
2017-06-15	23	10	F	2	1	9	2
2017-06-15	26	15	F	2	1	14	2
2017-06-15	24	15	F	2	1	15	2
2017-06-17	9	23	A	3	1	20	3
2017-06-17	20	20	A	3	1	20	3
2017-06-17	8	13	A	3	1.5	13	3
2017-06-17	7	17	B	3	1.5	13	3
2017-06-17	4	19	B	3	1.5	13	3
2017-06-17	5	20	B	3	1.5	15	3
2017-06-17	37	13	B	3	1.5	11	3
2017-06-17	12	10	B	3	1.5	10	3
2017-06-17	32	14	B	3	1.5	11	3
2017-06-17	6	19	C	3	1.5	18	3
2017-06-17	10	20	C	3	1.5	20	3
2017-06-17	11	24	C	3	1.5	21	3
2017-06-17	29	20	D	3	1.5	20	3
2017-06-17	13	14	D	3	1.5	11	3
2017-06-17	14	14	D	3	1.5	12	3
2017-06-17	15	33	D	3	1.5	25	3
2017-06-17	16	14	D	3	1.5	12	3
2017-06-17	30	16	D	3	1.5	14	3
2017-06-17	22	20	F	3	1.5	11	3
2017-06-17	3	8	F	3	1.5	8	3
2017-06-17	17	12	F	3	1.5	8	3
2017-06-17	23	16	F	3	1.5	13	3
2017-06-17	26	17	F	3	1.5	14	3
2017-06-17	24	17	F	3	1.5	17	3
2017-06-17	28	12	E	3	1.5	12	3
2017-06-17	19	17	E	3	1.5	16	3
2017-06-17	35	13	E	3	1.5	11	3
2017-06-19	9	23	A	4	2	21	na
2017-06-19	20	25	A	4	2	25	na
2017-06-19	8	15	A	4	2	15	na
2017-06-19	7	17	B	4	2	14	na
2017-06-19	4	18	B	4	2	12	na
2017-06-19	5	15	B	4	2	10	na
2017-06-19	37	17	B	4	2	16	na
2017-06-19	12	12	B	4	2	11	na
2017-06-19	32	13	B	4	2	10	na
2017-06-19	6	16	C	4	2	15	na
2017-06-19	10	14	C	4	2	14	na
2017-06-19	11	27	C	4	2	25	na
2017-06-19	29	24	D	4	2	23	na
2017-06-19	13	12	D	4	2	9	na
2017-06-19	14	9	D	4	2	8	na
2017-06-19	15	31	D	4	2	28	na
2017-06-19	16	15	D	4	2	11	na
2017-06-19	30	22	D	4	2	20	na
2017-06-19	28	8	E	4	2	8	na
2017-06-19	19	19	E	4	2	18	na
2017-06-19	35	12	E	4	2	11	na
2017-06-19	22	17	F	4	2	14	na
2017-06-19	3	12	F	4	2	11	na
2017-06-19	17	13	F	4	2	11	na
2017-06-19	23	9	F	4	2	8	na
2017-06-19	26	12	F	4	2	11	na
2017-06-19	24	16	F	4	2	15	na
2017-06-21	9	15	A	5	2.5	14	4
2017-06-21	20	17	A	5	2.5	17	4
2017-06-21	8	13	A	5	2.5	13	4
2017-06-21	7	17	B	5	2.5	14	4
2017-06-21	4	16	B	5	2.5	10	4
2017-06-21	5	20	B	5	2.5	12	4
2017-06-21	37	13	B	5	2.5	13	4
2017-06-21	12	11	B	5	2.5	11	4
2017-06-21	32	15	B	5	2.5	12	4
2017-06-21	6	18	C	5	2.5	17	4
2017-06-21	10	20	C	5	2.5	20	4
2017-06-21	11	22	C	5	2.5	19	4
2017-06-21	29	25	D	5	2.5	24	4
2017-06-21	13	10	D	5	2.5	6	4
2017-06-21	14	12	D	5	2.5	11	4
2017-06-21	15	30	D	5	2.5	25	4
2017-06-21	16	14	D	5	2.5	12	4
2017-06-21	30	24	D	5	2.5	24	4
2017-06-21	28	11	E	5	2.5	11	4
2017-06-21	19	17	E	5	2.5	17	4
2017-06-21	35	10	E	5	2.5	8	4
2017-06-21	22	15	F	5	2.5	12	4
2017-06-21	3	8	F	5	2.5	7	4
2017-06-21	17	12	F	5	2.5	10	4
2017-06-21	23	11	F	5	2.5	11	4
2017-06-21	26	12	F	5	2.5	10	4
2017-06-21	24	12	F	5	2.5	12	4
2017-06-23	9	21	A	6	3	20	4
2017-06-23	20	25	A	6	3	23	4
2017-06-23	8	7	A	6	3	7	4
2017-06-23	7	17	B	6	3	15	4
2017-06-23	4	16	B	6	3	10	4
2017-06-23	5	17	B	6	3	12	4
2017-06-23	37	12	B	6	3	10	4
2017-06-23	12	9	B	6	3	8	4
2017-06-23	32	13	B	6	3	11	4
2017-06-23	6	15	C	6	3	14	4
2017-06-23	10	18	C	6	3	18	4
2017-06-23	11	23	C	6	3	21	4
2017-06-23	29	23	D	6	3	22	4
2017-06-23	13	16	D	6	3	13	4
2017-06-23	14	12	D	6	3	11	4
2017-06-23	15	26	D	6	3	22	4
2017-06-23	16	11	D	6	3	10	4
2017-06-23	30	20	D	6	3	20	4
2017-06-23	28	12	E	6	3	12	4
2017-06-23	19	22	E	6	3	20	4
2017-06-23	35	15	E	6	3	13	4
2017-06-23	22	18	F	6	3	11	4
2017-06-23	3	10	F	6	3	10	4
2017-06-23	17	18	F	6	3	16	4
2017-06-23	23	11	F	6	3	9	4
2017-06-23	26	3	F	6	3	13	4
2017-06-23	24	15	F	6	3	15	4
2017-06-25	9	15	A	7	3.5	12	5
2017-06-25	20	21	A	7	3.5	18	5
2017-06-25	8	11	A	7	3.5	11	5
2017-06-25	7	14	B	7	3.5	10	5
2017-06-25	4	19	B	7	3.5	13	5
2017-06-25	5	12	B	7	3.5	7	5
2017-06-25	37	13	B	7	3.5	10	5
2017-06-25	12	4	B	7	3.5	10	5
2017-06-25	32	14	B	7	3.5	10	5
2017-06-25	6	13	C	7	3.5	10	5
2017-06-25	10	20	C	7	3.5	20	5
2017-06-25	11	23	C	7	3.5	20	5
2017-06-25	29	23	D	7	3.5	21	5
2017-06-25	13	9	D	7	3.5	5	5
2017-06-25	14	8	D	7	3.5	6	5
2017-06-25	15	24	D	7	3.5	21	5
2017-06-25	16	10	D	7	3.5	8	5
2017-06-25	30	22	D	7	3.5	16	5
2017-06-25	28	8	E	7	3.5	8	5
2017-06-25	19	17	E	7	3.5	14	5
2017-06-25	35	12	E	7	3.5	10	5
2017-06-25	22	16	F	7	3.5	8	5
2017-06-25	3	10	F	7	3.5	10	5
2017-06-25	17	10	F	7	3.5	7	5
2017-06-25	23	8	F	7	3.5	6	5
2017-06-25	26	9	F	7	3.5	7	5
2017-06-25	24	13	F	7	3.5	13	5
2017-06-27	9	14	A	8	4	13	na
2017-06-27	20	21	A	8	4	20	na
2017-06-27	8	8	A	8	4	8	na
2017-06-27	7	22	B	8	4	15	na
2017-06-27	4	10	B	8	4	5	na
2017-06-27	5	14	B	8	4	9	na
2017-06-27	37	14	B	8	4	10	na
2017-06-27	12	12	B	8	4	10	na
2017-06-27	32	14	B	8	4	10	na
2017-06-27	6	15	C	8	4	13	na
2017-06-27	10	19	C	8	4	18	na
2017-06-27	11	18	C	8	4	16	na
2017-06-27	29	19	D	8	4	18	na
2017-06-27	13	9	D	8	4	7	na
2017-06-27	14	8	D	8	4	8	na
2017-06-27	15	26	D	8	4	25	na
2017-06-27	16	15	D	8	4	10	na
2017-06-27	30	21	D	8	4	15	na
2017-06-27	28	14	E	8	4	13	na
2017-06-27	19	15	E	8	4	15	na
2017-06-27	35	13	E	8	4	12	na
2017-06-27	22	16	F	8	4	10	na
2017-06-27	3	9	F	8	4	9	na
2017-06-27	17	10	F	8	4	8	na
2017-06-27	23	9	F	8	4	9	na
2017-06-27	26	11	F	8	4	8	na
2017-06-27	24	14	F	8	4	14	na
2017-06-29	9	12	A	9	4.5	11	6
2017-06-29	20	18	A	9	4.5	18	6
2017-06-29	8	7	A	9	4.5	7	6
2017-06-29	7	18	B	9	4.5	17	6
2017-06-29	4	10	B	9	4.5	6	6
2017-06-29	5	11	B	9	4.5	5	6
2017-06-29	37	10	B	9	4.5	7	6
2017-06-29	12	9	B	9	4.5	7	6
2017-06-29	32	12	B	9	4.5	8	6
2017-06-29	6	14	C	9	4.5	13	6
2017-06-29	10	20	C	9	4.5	20	6
2017-06-29	11	15	C	9	4.5	12	6
2017-06-29	29	19	D	9	4.5	17	6
2017-06-29	13	10	D	9	4.5	9	6
2017-06-29	14	6	D	9	4.5	4	6
2017-06-29	15	15	D	9	4.5	14	6
2017-06-29	16	13	D	9	4.5	10	6
2017-06-29	30	28	D	9	4.5	23	6
2017-06-29	28	9	E	9	4.5	8	6
2017-06-29	19	17	E	9	4.5	14	6
2017-06-29	35	8	E	9	4.5	7	6
2017-06-29	22	9	F	9	4.5	6	6
2017-06-29	3	6	F	9	4.5	6	6
2017-06-29	17	17	F	9	4.5	13	6
2017-06-29	23	9	F	9	4.5	9	6
2017-06-29	26	21	F	9	4.5	18	6
2017-06-29	24	17	F	9	4.5	15	6
2017-07-01	9	13	A	10	5	12	na
2017-07-01	20	21	A	10	5	18	na
2017-07-01	8	6	A	10	5	6	na
2017-07-01	7	20	B	10	5	18	na
2017-07-01	4	23	B	10	5	16	na
2017-07-01	5	14	B	10	5	8	na
2017-07-01	37	14	B	10	5	10	na
2017-07-01	12	10	B	10	5	9	na
2017-07-01	32	13	B	10	5	9	na
2017-07-01	6	18	C	10	5	16	na
2017-07-01	10	16	C	10	5	16	na
2017-07-01	11	17	C	10	5	15	na
2017-07-01	29	17	D	10	5	15	na
2017-07-01	13	10	D	10	5	6	na
2017-07-01	14	6	D	10	5	5	na
2017-07-01	15	25	D	10	5	21	na
2017-07-01	16	17	D	10	5	13	na
2017-07-01	30	31	D	10	5	24	na
2017-07-01	28	10	E	10	5	9	na
2017-07-01	19	21	E	10	5	18	na
2017-07-01	35	8	E	10	5	8	na
2017-07-01	22	12	F	10	5	8	na
2017-07-01	3	5	F	10	5	5	na
2017-07-01	17	16	F	10	5	15	na
2017-07-01	23	8	F	10	5	8	na
2017-07-01	26	21	F	10	5	18	na
2017-07-01	24	23	F	10	5	23	na
2017-07-03	9	9	A	11	5.5	9	7
2017-07-03	20	16	A	11	5.5	13	7
2017-07-03	8	6	A	11	5.5	6	7
2017-07-03	7	15	B	11	5.5	12	7
2017-07-03	4	17	B	11	5.5	12	7
2017-07-03	5	19	B	11	5.5	14	7
2017-07-03	37	17	B	11	5.5	14	7
2017-07-03	12	10	B	11	5.5	8	7
2017-07-03	32	13	B	11	5.5	10	7
2017-07-03	6	15	C	11	5.5	14	7
2017-07-03	10	14	C	11	5.5	14	7
2017-07-03	11	18	C	11	5.5	14	7
2017-07-03	29	12	D	11	5.5	12	7
2017-07-03	13	5	D	11	5.5	4	7
2017-07-03	14	4	D	11	5.5	4	7
2017-07-03	15	22	D	11	5.5	19	7
2017-07-03	16	7	D	11	5.5	4	7
2017-07-03	30	24	D	11	5.5	24	7
2017-07-03	28	14	E	11	5.5	14	7
2017-07-03	19	14	E	11	5.5	12	7
2017-07-03	35	8	E	11	5.5	8	7
2017-07-03	22	10	F	11	5.5	8	7
2017-07-03	3	0	F	11	5.5	0	7
2017-07-03	17	12	F	11	5.5	10	7
2017-07-03	23	5	F	11	5.5	5	7
2017-07-03	26	18	F	11	5.5	14	7
2017-07-03	24	19	F	11	5.5	18	7
2017-07-05	9	12	A	12	6	11	na
2017-07-05	20	20	A	12	6	18	na
2017-07-05	8	7	A	12	6	7	na
2017-07-05	7	15	B	12	6	13	na
2017-07-05	4	18	B	12	6	11	na
2017-07-05	5	18	B	12	6	12	na
2017-07-05	37	16	B	12	6	13	na
2017-07-05	12	8	B	12	6	8	na
2017-07-05	32	11	B	12	6	9	na
2017-07-05	6	17	C	12	6	16	na
2017-07-05	10	14	C	12	6	14	na
2017-07-05	11	19	C	12	6	14	na
2017-07-05	29	14	D	12	6	13	na
2017-07-05	13	5	D	12	6	2	na
2017-07-05	14	5	D	12	6	4	na
2017-07-05	15	18	D	12	6	13	na
2017-07-05	16	8	D	12	6	6	na
2017-07-05	30	26	D	12	6	25	na
2017-07-05	28	15	E	12	6	15	na
2017-07-05	19	16	E	12	6	14	na
2017-07-05	35	7	E	12	6	7	na
2017-07-05	22	7	F	12	6	6	na
2017-07-05	3	1	F	12	6	0	na
2017-07-05	17	5	F	12	6	4	na
2017-07-05	23	3	F	12	6	3	na
2017-07-05	26	16	F	12	6	12	na
2017-07-05	24	19	F	12	6	18	na
2017-07-06	9	10	A	12.5	6.25	10	8
2017-07-06	20	12	A	12.5	6.25	12	8
2017-07-06	8	4	A	12.5	6.25	4	8
2017-07-06	7	13	B	12.5	6.25	12	8
2017-07-06	4	12	B	12.5	6.25	7	8
2017-07-06	5	16	B	12.5	6.25	9	8
2017-07-06	37	13	B	12.5	6.25	11	8
2017-07-06	12	7	B	12.5	6.25	7	8
2017-07-06	32	11	B	12.5	6.25	8	8
2017-07-06	6	14	C	12.5	6.25	12	8
2017-07-06	10	12	C	12.5	6.25	12	8
2017-07-06	11	16	C	12.5	6.25	12	8
2017-07-06	29	10	D	12.5	6.25	9	8
2017-07-06	13	3	D	12.5	6.25	1	8
2017-07-06	14	1	D	12.5	6.25	1	8
2017-07-06	15	16	D	12.5	6.25	12	8
2017-07-06	16	5	D	12.5	6.25	4	8
2017-07-06	30	19	D	12.5	6.25	11	8
2017-07-06	28	6	E	12.5	6.25	6	8
2017-07-06	19	17	E	12.5	6.25	14	8
2017-07-06	35	15	E	12.5	6.25	14	8
2017-07-06	22	6	F	12.5	6.25	3	8
2017-07-06	3	1	F	12.5	6.25	0	8
2017-07-06	17	3	F	12.5	6.25	1	8
2017-07-06	23	0	F	12.5	6.25	0	8
2017-07-06	26	15	F	12.5	6.25	13	8
2017-07-06	24	13	F	12.5	6.25	12	8
2017-07-09	9	14	A	14	7	14	8
2017-07-09	20	12	A	14	7	11	8
2017-07-09	8	4	A	14	7	4	8
2017-07-09	7	12	B	14	7	10	8
2017-07-09	4	17	B	14	7	12	8
2017-07-09	5	21	B	14	7	16	8
2017-07-09	37	12	B	14	7	10	8
2017-07-09	12	4	B	14	7	4	8
2017-07-09	32	14	B	14	7	12	8
2017-07-09	6	16	C	14	7	15	8
2017-07-09	10	14	C	14	7	14	8
2017-07-09	11	18	C	14	7	13	8
2017-07-09	29	14	D	14	7	12	8
2017-07-09	13	3	D	14	7	1	8
2017-07-09	14	2	D	14	7	2	8
2017-07-09	15	15	D	14	7	14	8
2017-07-09	16	5	D	14	7	3	8
2017-07-09	30	21	D	14	7	12	8
2017-07-09	28	11	E	14	7	10	8
2017-07-09	19	16	E	14	7	10	8
2017-07-09	35	5	E	14	7	5	8
2017-07-09	22	8	F	14	7	6	8
2017-07-09	3	1	F	14	7	0	8
2017-07-09	17	1	F	14	7	0	8
2017-07-09	23	0	F	14	7	0	8
2017-07-09	26	1	F	14	7	10	8
2017-07-09	24	9	F	14	7	8	8

## Sheet: Bailesetal_datafile2_ESM.csv
Date	SamplePeriod	Compartment	Quad type	Sample	Species	Species2	Amount	Proportion	Person	ScaledTotal
2017-06-10	1	D	Quad	1	g1	g1	6		JB	1267.2
2017-06-10	1	D	Quad	1	pop	pop	5		JB	1056
2017-06-10	1	D	Quad	1	cam	cam	32		JB	6758.4
2017-06-10	1	D	Quad	1	med	med	8		JB	1689.6
2017-06-10	1	D	Quad	1	clo	clo	1		JB	211.2
2017-06-10	1	D	Quad	2	g1	g1	21		JB	4435.2
2017-06-10	1	D	Quad	2	pop	pop	7		JB	1478.4
2017-06-10	1	D	Quad	2	cam	cam	36		JB	7603.2
2017-06-10	1	D	Quad	2	med	med	4		JB	844.8
2017-06-10	1	D	Quad	2	clo	clo	0		JB	0
2017-06-10	1	D	Sub-s	3	g1	g1	26	0.5	JB	10982.4
2017-06-10	1	D	Quad	3	pop	pop	8		JB	1689.6
2017-06-10	1	D	Sub-s	3	cam	cam	45	0.5	JB	19008
2017-06-10	1	D	Quad	3	med	med	8		JB	1689.6
2017-06-10	1	D	Quad	3	clo	clo	0		JB	0
2017-06-10	1	D	Quad	4	g1	g1	22		JB	4646.4
2017-06-10	1	D	Quad	4	pop	pop	12		JB	2534.4
2017-06-10	1	D	Sub-s	4	cam	cam	53	0.5	JB	22387.2
2017-06-10	1	D	Quad	4	med	med	0		JB	0
2017-06-10	1	D	Quad	4	clo	clo	0		JB	0
2017-06-10	1	D	Quad	5	g1	g1	9		JB	1900.8
2017-06-10	1	D	Quad	5	pop	pop	3		JB	633.6
2017-06-10	1	D	Quad	5	cam	cam	34		JB	7180.8
2017-06-10	1	D	Quad	5	med	med	0		JB	0
2017-06-10	1	D	Quad	5	clo	clo	0		JB	0
2017-06-10	1	D	Entire	All	med	med	9		JB	9
2017-06-10	1	D	Entire	All	ox	ox	5		JB	5
2017-06-10	1	E	Quad	1	g1	g1	7		JB	1478.4
2017-06-10	1	E	Quad	1	pop	pop	17		JB	3590.4
2017-06-10	1	E	Quad	1	cam	cam	89		JB	18796.8
2017-06-10	1	E	Quad	1	med	med	0		JB	0
2017-06-10	1	E	Quad	1	clo	clo	0		JB	0
2017-06-10	1	E	Quad	2	g1	g1	14		JB	2956.8
2017-06-10	1	E	Quad	2	pop	pop	36		JB	7603.2
2017-06-10	1	E	Quad	2	cam	cam	35		JB	7392
2017-06-10	1	E	Quad	2	med	med	5		JB	1056
2017-06-10	1	E	Quad	2	clo	clo	0		JB	0
2017-06-10	1	E	Quad	3	g1	g1	18		JB	3801.6
2017-06-10	1	E	Quad	3	pop	pop	4		JB	844.8
2017-06-10	1	E	Sub-s	3	cam	cam	35	0.5	JB	14784
2017-06-10	1	E	Quad	3	med	med	6		JB	1267.2
2017-06-10	1	E	Quad	3	clo	clo	0		JB	0
2017-06-10	1	E	Quad	4	g1	g1	8		JB	1689.6
2017-06-10	1	E	Quad	4	pop	pop	12		JB	2534.4
2017-06-10	1	E	Quad	4	cam	cam	42		JB	8870.4
2017-06-10	1	E	Quad	4	med	med	11		JB	2323.2
2017-06-10	1	E	Quad	4	clo	clo	0		JB	0
2017-06-10	1	E	Quad	5	g1	g1	19		JB	4012.8
2017-06-10	1	E	Quad	5	pop	pop	4		JB	844.8
2017-06-10	1	E	Quad	5	cam	cam	1		JB	211.2
2017-06-10	1	E	Sub-s	5	med	med	37	0.5	JB	15628.8
2017-06-10	1	E	Quad	5	clo	clo	0		JB	0
2017-06-10	1	E	Entire	All	ox	ox	8		JB	8
2017-06-10	1	F	Quad	1	g1	g1	22		JB	4646.4
2017-06-10	1	F	Quad	1	pop	pop	2		JB	422.4
2017-06-10	1	F	Quad	1	cam	cam	0		JB	0
2017-06-10	1	F	Quad	1	med	med	13		JB	2745.6
2017-06-10	1	F	Quad	1	clo	clo	0		JB	0
2017-06-10	1	F	Quad	2	g1	g1	2		JB	422.4
2017-06-10	1	F	Quad	2	pop	pop	2		JB	422.4
2017-06-10	1	F	Sub-s	2	cam	cam	20	0.25	JB	16896
2017-06-10	1	F	Quad	2	med	med	0		JB	0
2017-06-10	1	F	Quad	2	clo	clo	0		JB	0
2017-06-10	1	F	Quad	3	g1	g1	13		JB	2745.6
2017-06-10	1	F	Quad	3	pop	pop	7		JB	1478.4
2017-06-10	1	F	Quad	3	cam	cam	64		JB	13516.8
2017-06-10	1	F	Quad	3	med	med	4		JB	844.8
2017-06-10	1	F	Quad	3	clo	clo	0		JB	0
2017-06-10	1	F	Quad	3	med	med	47		JB	9926.4
2017-06-10	1	F	Quad	4	g1	g1	32		JB	6758.4
2017-06-10	1	F	Quad	4	pop	pop	7		JB	1478.4
2017-06-10	1	F	Quad	4	cam	cam	0		JB	0
2017-06-10	1	F	Quad	4	med	med	3		JB	633.6
2017-06-10	1	F	Quad	4	clo	clo	0		JB	0
2017-06-10	1	F	Quad	5	g1	g1	27		JB	5702.4
2017-06-10	1	F	Quad	5	pop	pop	3		JB	633.6
2017-06-10	1	F	Quad	5	cam	cam	34		JB	7180.8
2017-06-10	1	F	Quad	5	med	med	18		JB	3801.6
2017-06-10	1	F	Quad	5	clo	clo	0		JB	0
2017-06-10	1	F	Entire	All	ox	ox	12		JB	12
2017-06-10	1	C	Quad	1	pop	pop	3		EB	633.6
2017-06-10	1	C	Quad	1	cam	cam	151		EB	31891.2
2017-06-10	1	C	Quad	1	med	med	3		EB	633.6
2017-06-10	1	C	Quad	1	g1	g1	19		EB	4012.8
2017-06-10	1	C	Quad	2	pop	pop	2		EB	422.4
2017-06-10	1	C	Quad	2	cam	cam	0		EB	0
2017-06-10	1	C	Quad	2	med	med	8		EB	1689.6
2017-06-10	1	C	Quad	2	g1	g1	9		EB	1900.8
2017-06-10	1	C	Quad	3	pop	pop	0		EB	0
2017-06-10	1	C	Sub-s	3	cam	cam	95	0.25	EB	80256
2017-06-10	1	C	Quad	3	med	med	60		EB	12672
2017-06-10	1	C	Quad	3	g1	g1	43		EB	9081.6
2017-06-10	1	C	Quad	4	pop	pop	2		EB	422.4
2017-06-10	1	C	Quad	4	cam	cam	99		EB	20908.8
2017-06-10	1	C	Quad	4	med	med	4		EB	844.8
2017-06-10	1	C	Quad	4	g1	g1	32		EB	6758.4
2017-06-10	1	C	Quad	5	pop	pop	4		EB	844.8
2017-06-10	1	C	Quad	5	cam	cam	47		EB	9926.4
2017-06-10	1	C	Quad	5	med	med	9		EB	1900.8
2017-06-10	1	C	Quad	5	g1	g1	8		EB	1689.6
2017-06-10	1	B	Quad	1	pop	pop	5		EB	1056
2017-06-10	1	B	Quad	1	cam	cam	32		EB	6758.4
2017-06-10	1	B	Quad	1	med	med	0		EB	0
2017-06-10	1	B	Quad	1	g1	g1	3		EB	633.6
2017-06-10	1	B	Quad	2	pop	pop	5		EB	1056
2017-06-10	1	B	Quad	2	cam	cam	4		EB	844.8
2017-06-10	1	B	Quad	2	med	med	0		EB	0
2017-06-10	1	B	Quad	2	g1	g1	9		EB	1900.8
2017-06-10	1	B	Quad	3	pop	pop	8		EB	1689.6
2017-06-10	1	B	Quad	3	cam	cam	30		EB	6336
2017-06-10	1	B	Quad	3	med	med	4		EB	844.8
2017-06-10	1	B	Quad	3	g1	g1	18		EB	3801.6
2017-06-10	1	B	Quad	4	pop	pop	3		EB	633.6
2017-06-10	1	B	Quad	4	cam	cam	96		EB	20275.2
2017-06-10	1	B	Quad	4	med	med	1		EB	211.2
2017-06-10	1	B	Quad	4	g1	g1	25		EB	5280
2017-06-10	1	B	Quad	5	pop	pop	5		EB	1056
2017-06-10	1	B	Quad	5	cam	cam	71		EB	14995.2
2017-06-10	1	B	Quad	5	med	med	0		EB	0
2017-06-10	1	B	Quad	5	g1	g1	23		EB	4857.6
2017-06-10	1	A	Quad	1	pop	pop	12		EB	2534.4
2017-06-10	1	A	Quad	1	cam	cam	62		EB	13094.4
2017-06-10	1	A	Quad	1	med	med	3		EB	633.6
2017-06-10	1	A	Quad	1	g1	g1	17		EB	3590.4
2017-06-10	1	A	Quad	2	pop	pop	3		EB	633.6
2017-06-10	1	A	Quad	2	cam	cam	84		EB	17740.8
2017-06-10	1	A	Quad	2	med	med	0		EB	0
2017-06-10	1	A	Quad	2	g1	g1	6		EB	1267.2
2017-06-10	1	A	Quad	3	pop	pop	10		EB	2112
2017-06-10	1	A	Quad	3	cam	cam	120		EB	25344
2017-06-10	1	A	Quad	3	med	med	0		EB	0
2017-06-10	1	A	Quad	3	g1	g1	8		EB	1689.6
2017-06-10	1	A	Quad	4	pop	pop	6		EB	1267.2
2017-06-10	1	A	Quad	4	cam	cam	34		EB	7180.8
2017-06-10	1	A	Quad	4	med	med	0		EB	0
2017-06-10	1	A	Quad	4	g1	g1	12		EB	2534.4
2017-06-10	1	A	Quad	5	pop	pop	15		EB	3168
2017-06-10	1	A	Sub-s	5	cam	cam	59	0.6	EB	20768
2017-06-10	1	A	Quad	5	med	med	0		EB	0
2017-06-10	1	A	Quad	5	g1	g1	10		EB	2112
2017-06-14	2	A	Quad	1	pop	pop	1		EB	211.2
2017-06-14	2	A	Quad	1	cam	cam	128		EB	27033.6
2017-06-14	2	A	Quad	1	med	med	0		EB	0
2017-06-14	2	A	Quad	1	g1	g1	14		EB	2956.8
2017-06-14	2	A	Quad	2	pop	pop	9		EB	1900.8
2017-06-14	2	A	Quad	2	cam	cam	40		EB	8448
2017-06-14	2	A	Quad	2	med	med	1		EB	211.2
2017-06-14	2	A	Quad	2	g1	g1	0		EB	0
2017-06-14	2	A	Quad	3	pop	pop	4		EB	844.8
2017-06-14	2	A	Quad	3	cam	cam	99		EB	20908.8
2017-06-14	2	A	Quad	3	med	med	4		EB	844.8
2017-06-14	2	A	Quad	3	g1	g1	6		EB	1267.2
2017-06-14	2	A	Quad	4	pop	pop	6		EB	1267.2
2017-06-14	2	A	Quad	4	cam	cam	80		EB	16896
2017-06-14	2	A	Quad	4	med	med	12		EB	2534.4
2017-06-14	2	A	Quad	4	g1	g1	4		EB	844.8
2017-06-14	2	A	Quad	5	pop	pop	1		EB	211.2
2017-06-14	2	A	Quad	5	cam	cam	74		EB	15628.8
2017-06-14	2	A	Quad	5	med	med	5		EB	1056
2017-06-14	2	A	Quad	5	g1	g1	11		EB	2323.2
2017-06-14	2	A	Quad	6	pop	pop	9		EB	1900.8
2017-06-14	2	A	Quad	6	cam	cam	32		EB	6758.4
2017-06-14	2	A	Quad	6	med	med	0		EB	0
2017-06-14	2	A	Quad	6	g1	g1	4		EB	844.8
2017-06-14	2	B	Quad	1	pop	pop	1		EB	211.2
2017-06-14	2	B	Quad	1	cam	cam	49		EB	10348.8
2017-06-14	2	B	Quad	1	med	med	0		EB	0
2017-06-14	2	B	Quad	1	fd	fd	0		EB	0
2017-06-14	2	B	Quad	1	g1	g1	10		EB	2112
2017-06-14	2	B	Quad	2	pop	pop	5		EB	1056
2017-06-14	2	B	Quad	2	cam	cam	35		EB	7392
2017-06-14	2	B	Sub-s	2	med	med	16	0.2	EB	16896
2017-06-14	2	B	Quad	2	fd	fd	0		EB	0
2017-06-14	2	B	Quad	2	g1	g1	11		EB	2323.2
2017-06-14	2	B	Quad	3	pop	pop	8		EB	1689.6
2017-06-14	2	B	Quad	3	cam	cam	84		EB	17740.8
2017-06-14	2	B	Quad	3	med	med	0		EB	0
2017-06-14	2	B	Quad	3	fd	fd	0		EB	0
2017-06-14	2	B	Quad	3	g1	g1	8		EB	1689.6
2017-06-14	2	B	Quad	4	pop	pop	7		EB	1478.4
2017-06-14	2	B	Quad	4	cam	cam	61		EB	12883.2
2017-06-14	2	B	Quad	4	fd	fd	27		EB	5702.4
2017-06-14	2	B	Quad	4	med	med	0		EB	0
2017-06-14	2	B	Quad	4	g1	g1	9		EB	1900.8
2017-06-14	2	B	Quad	5	pop	pop	4		EB	844.8
2017-06-14	2	B	Quad	5	cam	cam	55		EB	11616
2017-06-14	2	B	Quad	5	med	med	5		EB	1056
2017-06-14	2	B	Quad	5	g1	g1	12		EB	2534.4
2017-06-14	2	B	Quad	5	fd	fd	0		EB	0
2017-06-14	2	B	Quad	6	pop	pop	7		EB	1478.4
2017-06-14	2	B	Quad	6	cam	cam	49		EB	10348.8
2017-06-14	2	B	Sub-s	6	med	med	27	0.6	EB	9504
2017-06-14	2	B	Quad	6	g1	g1	10		EB	2112
2017-06-14	2	B	Quad	6	fd	fd	0		EB	0
2017-06-14	2	C	Quad	1	pop	pop	1		EB	211.2
2017-06-14	2	C	Quad	1	cam	cam	15		EB	3168
2017-06-14	2	C	Quad	1	med	med	18		EB	3801.6
2017-06-14	2	C	Quad	1	fd	fd	17		EB	3590.4
2017-06-14	2	C	Quad	1	g1	g1	9		EB	1900.8
2017-06-14	2	C	Quad	2	pop	pop	2		EB	422.4
2017-06-14	2	C	Quad	2	cam	cam	3		EB	633.6
2017-06-14	2	C	Quad	2	med	med	16		EB	3379.2
2017-06-14	2	C	Quad	2	fd	fd	11		EB	2323.2
2017-06-14	2	C	Quad	2	g1	g1	4		EB	844.8
2017-06-14	2	C	Quad	3	pop	pop	6		EB	1267.2
2017-06-14	2	C	Quad	3	cam	cam	142		EB	29990.4
2017-06-14	2	C	Sub-s	3	med	med	14	0.2	EB	14784
2017-06-14	2	C	Quad	3	fd	fd	0		EB	0
2017-06-14	2	C	Quad	3	g1	g1	8		EB	1689.6
2017-06-14	2	C	Quad	4	pop	pop	0		EB	0
2017-06-14	2	C	Quad	4	cam	cam	226		EB	47731.2
2017-06-14	2	C	Quad	4	fd	fd	0		EB	0
2017-06-14	2	C	Sub-s	4	med	med	15	0.2	EB	15840
2017-06-14	2	C	Quad	4	g1	g1	3		EB	633.6
2017-06-14	2	C	Quad	5	pop	pop	3		EB	633.6
2017-06-14	2	C	Quad	5	cam	cam	109		EB	23020.8
2017-06-14	2	C	Quad	5	med	med	14		EB	2956.8
2017-06-14	2	C	Quad	5	g1	g1	25		EB	5280
2017-06-14	2	C	Quad	5	fd	fd	0		EB	0
2017-06-14	2	C	Quad	6	pop	pop	7		EB	1478.4
2017-06-14	2	C	Sub-s	6	cam	cam	65	0.3	EB	45760
2017-06-14	2	C	Quad	6	med	med	13		EB	2745.6
2017-06-14	2	C	Quad	6	g1	g1	8		EB	1689.6
2017-06-14	2	C	Quad	6	fd	fd	0		EB	0
2017-06-14	2	F	Quad	1	pop	pop	7		EB	1478.4
2017-06-14	2	F	Quad	1	cam	cam	65		EB	13728
2017-06-14	2	F	Quad	1	med	med	25		EB	5280
2017-06-14	2	F	Quad	1	fd	fd	2		EB	422.4
2017-06-14	2	F	Quad	1	g1	g1	23		EB	4857.6
2017-06-14	2	F	Quad	2	pop	pop	6		EB	1267.2
2017-06-14	2	F	Quad	2	cam	cam	24		EB	5068.8
2017-06-14	2	F	Quad	2	med	med	11		EB	2323.2
2017-06-14	2	F	Quad	2	fd	fd	0		EB	0
2017-06-14	2	F	Quad	2	g1	g1	19		EB	4012.8
2017-06-14	2	F	Quad	3	pop	pop	0		EB	0
2017-06-14	2	F	Quad	3	cam	cam	13		EB	2745.6
2017-06-14	2	F	Quad	3	med	med	53		EB	11193.6
2017-06-14	2	F	Quad	3	fd	fd	4		EB	844.8
2017-06-14	2	F	Quad	3	g1	g1	22		EB	4646.4
2017-06-14	2	F	Quad	4	pop	pop	10		EB	2112
2017-06-14	2	F	Quad	4	cam	cam	17		EB	3590.4
2017-06-14	2	F	Quad	4	fd	fd	3		EB	633.6
2017-06-14	2	F	Sub-s	4	med	med	12	0.3	EB	8448
2017-06-14	2	F	Quad	4	g1	g1	17		EB	3590.4
2017-06-14	2	F	Quad	5	pop	pop	7		EB	1478.4
2017-06-14	2	F	Sub-s	5	cam	cam	46	0.2	EB	48576
2017-06-14	2	F	Sub-s	5	med	med	9	0.2	EB	9504
2017-06-14	2	F	Quad	5	g1	g1	23		EB	4857.6
2017-06-14	2	F	Quad	5	fd	fd	0		EB	0
2017-06-14	2	F	Quad	6	pop	pop	12		EB	2534.4
2017-06-14	2	F	Sub-s	6	cam	cam	63	0.4	EB	33264
2017-06-14	2	F	Quad	6	med	med	1		EB	211.2
2017-06-14	2	F	Quad	6	g1	g1	22		EB	4646.4
2017-06-14	2	F	Quad	6	fd	fd	0		EB	0
2017-06-14	2	E	Quad	1	pop	pop	7		EB	1478.4
2017-06-14	2	E	Quad	1	cam	cam	0		EB	0
2017-06-14	2	E	Quad	1	med	med	0		EB	0
2017-06-14	2	E	Quad	1	fd	fd	7		EB	1478.4
2017-06-14	2	E	Quad	1	g1	g1	3		EB	633.6
2017-06-14	2	E	Quad	2	pop	pop	4		EB	844.8
2017-06-14	2	E	Quad	2	cam	cam	0		EB	0
2017-06-14	2	E	Sub-s	2	med	med	21	0.3	EB	14784
2017-06-14	2	E	Quad	2	fd	fd	4		EB	844.8
2017-06-14	2	E	Quad	2	g1	g1	17		EB	3590.4
2017-06-14	2	E	Quad	3	pop	pop	3		EB	633.6
2017-06-14	2	E	Sub-s	3	cam	cam	29	0.3	EB	20416
2017-06-14	2	E	Sub-s	3	med	med	21	0.3	EB	14784
2017-06-14	2	E	Quad	3	fd	fd	0		EB	0
2017-06-14	2	E	Quad	3	g1	g1	20		EB	4224
2017-06-14	2	E	Quad	4	pop	pop	6		EB	1267.2
2017-06-14	2	E	Quad	4	cam	cam	82		EB	17318.4
2017-06-14	2	E	Quad	4	fd	fd	0		EB	0
2017-06-14	2	E	Quad	4	med	med	4		EB	844.8
2017-06-14	2	E	Quad	4	g1	g1	11		EB	2323.2
2017-06-14	2	E	Quad	5	pop	pop	14		EB	2956.8
2017-06-14	2	E	Quad	5	cam	cam	73		EB	15417.6
2017-06-14	2	E	Quad	5	med	med	2		EB	422.4
2017-06-14	2	E	Quad	5	g1	g1	18		EB	3801.6
2017-06-14	2	E	Quad	5	fd	fd	0		EB	0
2017-06-14	2	E	Quad	6	pop	pop	7		EB	1478.4
2017-06-14	2	E	Quad	6	cam	cam	47		EB	9926.4
2017-06-14	2	E	Quad	6	med	med	7		EB	1478.4
2017-06-14	2	E	Quad	6	g1	g1	13		EB	2745.6
2017-06-14	2	E	Quad	6	fd	fd	0		EB	0
2017-06-14	2	D	Quad	1	pop	pop	4		EB	844.8
2017-06-14	2	D	Quad	1	cam	cam	131		EB	27667.2
2017-06-14	2	D	Quad	1	med	med	0		EB	0
2017-06-14	2	D	Quad	1	fd	fd	0		EB	0
2017-06-14	2	D	Quad	1	g1	g1	16		EB	3379.2
2017-06-14	2	D	Quad	2	pop	pop	1		EB	211.2
2017-06-14	2	D	Quad	2	cam	cam	80		EB	16896
2017-06-14	2	D	Sub-s	2	med	med	17	0.2	EB	17952
2017-06-14	2	D	Quad	2	fd	fd	3		EB	633.6
2017-06-14	2	D	Quad	2	g1	g1	28		EB	5913.6
2017-06-14	2	D	Quad	3	pop	pop	4		EB	844.8
2017-06-14	2	D	Quad	3	cam	cam	92		EB	19430.4
2017-06-14	2	D	Quad	3	med	med	18		EB	3801.6
2017-06-14	2	D	Quad	3	fd	fd	1		EB	211.2
2017-06-14	2	D	Quad	3	g1	g1	7		EB	1478.4
2017-06-14	2	D	Quad	4	pop	pop	2		EB	422.4
2017-06-14	2	D	Quad	4	cam	cam	7		EB	1478.4
2017-06-14	2	D	Quad	4	fd	fd	0		EB	0
2017-06-14	2	D	Quad	4	med	med	0		EB	0
2017-06-14	2	D	Quad	4	g1	g1	22		EB	4646.4
2017-06-14	2	D	Quad	5	pop	pop	0		EB	0
2017-06-14	2	D	Quad	5	cam	cam	43		EB	9081.6
2017-06-14	2	D	Quad	5	med	med	4		EB	844.8
2017-06-14	2	D	Quad	5	g1	g1	30		EB	6336
2017-06-14	2	D	Quad	5	fd	fd	0		EB	0
2017-06-14	2	D	Quad	6	pop	pop	15		EB	3168
2017-06-14	2	D	Quad	6	cam	cam	44		EB	9292.8
2017-06-14	2	D	Quad	6	med	med	15		EB	3168
2017-06-14	2	D	Quad	6	g1	g1	17		EB	3590.4
2017-06-14	2	D	Quad	6	fd	fd	0		EB	0
2017-06-17	3	A	Quad	1	pop	pop	7		JB	1478.4
2017-06-17	3	A	Quad	1	cam	cam	38		JB	8025.6
2017-06-17	3	A	Quad	1	fd	fd	1		JB	211.2
2017-06-17	3	A	Quad	1	med	med	5		JB	1056
2017-06-17	3	A	Quad	1	clo	clo	0		JB	0
2017-06-17	3	A	Quad	1	g1	g1	3		JB	633.6
2017-06-17	3	A	Quad	2	pop	pop	9		JB	1900.8
2017-06-17	3	A	Sub-s	2	cam	cam	54	0.5	JB	22809.6
2017-06-17	3	A	Quad	2	fd	fd	0		JB	0
2017-06-17	3	A	Quad	2	med	med	0		JB	0
2017-06-17	3	A	Quad	2	clo	clo	0		JB	0
2017-06-17	3	A	Quad	2	g1	g1	10		JB	2112
2017-06-17	3	A	Quad	3	pop	pop	25		JB	5280
2017-06-17	3	A	Sub-s	3	cam	cam	62	0.5	JB	26188.8
2017-06-17	3	A	Quad	3	fd	fd	4		JB	844.8
2017-06-17	3	A	Quad	3	med	med	0		JB	0
2017-06-17	3	A	Quad	3	clo	clo	0		JB	0
2017-06-17	3	A	Quad	3	g1	g1	2		JB	422.4
2017-06-17	3	A	Quad	4	pop	pop	11		JB	2323.2
2017-06-17	3	A	Sub-s	4	cam	cam	31	0.5	JB	13094.4
2017-06-17	3	A	Quad	4	fd	fd	6		JB	1267.2
2017-06-17	3	A	Quad	4	med	med	4		JB	844.8
2017-06-17	3	A	Quad	4	clo	clo	0		JB	0
2017-06-17	3	A	Quad	4	g1	g1	5		JB	1056
2017-06-17	3	A	Quad	5	pop	pop	1		JB	211.2
2017-06-17	3	A	Sub-s	5	cam	cam	54	0.5	JB	22809.6
2017-06-17	3	A	Quad	5	fd	fd	20		JB	4224
2017-06-17	3	A	Quad	5	med	med	12		JB	2534.4
2017-06-17	3	A	Quad	5	clo	clo	0		JB	0
2017-06-17	3	A	Quad	5	g1	g1	7		JB	1478.4
2017-06-17	3	B	Quad	1	pop	pop	8		JB	1689.6
2017-06-17	3	B	Quad	1	cam	cam	20		JB	4224
2017-06-17	3	B	Quad	1	fd	fd	0		JB	0
2017-06-17	3	B	Quad	1	med	med	5		JB	1056
2017-06-17	3	B	Quad	1	clo	clo	0		JB	0
2017-06-17	3	B	Quad	1	ox	ox	1		JB	211.2
2017-06-17	3	B	Quad	1	g1	g1	3		JB	633.6
2017-06-17	3	B	Quad	2	pop	pop	5		JB	1056
2017-06-17	3	B	Quad	2	cam	cam	51		JB	10771.2
2017-06-17	3	B	Quad	2	fd	fd	9		JB	1900.8
2017-06-17	3	B	Quad	2	med	med	12		JB	2534.4
2017-06-17	3	B	Quad	2	clo	clo	0		JB	0
2017-06-17	3	B	Quad	2	ox	ox	0		JB	0
2017-06-17	3	B	Quad	2	g1	g1	2		JB	422.4
2017-06-17	3	B	Quad	3	pop	pop	3		JB	633.6
2017-06-17	3	B	Sub-s	3	cam	cam	37	0.5	JB	15628.8
2017-06-17	3	B	Quad	3	fd	fd	0		JB	0
2017-06-17	3	B	Quad	3	med	med	3		JB	633.6
2017-06-17	3	B	Quad	3	clo	clo	4		JB	844.8
2017-06-17	3	B	Quad	3	ox	ox	0		JB	0
2017-06-17	3	B	Quad	3	g1	g1	9		JB	1900.8
2017-06-17	3	B	Quad	4	pop	pop	8		JB	1689.6
2017-06-17	3	B	Sub-s	4	cam	cam	42	0.5	JB	17740.8
2017-06-17	3	B	Quad	4	fd	fd	0		JB	0
2017-06-17	3	B	Quad	4	med	med	0		JB	0
2017-06-17	3	B	Quad	4	clo	clo	0		JB	0
2017-06-17	3	B	Quad	4	ox	ox	1		JB	211.2
2017-06-17	3	B	Quad	4	g1	g1	8		JB	1689.6
2017-06-17	3	B	Quad	5	pop	pop	4		JB	844.8
2017-06-17	3	B	Quad	5	cam	cam	21		JB	4435.2
2017-06-17	3	B	Quad	5	fd	fd	0		JB	0
2017-06-17	3	B	Quad	5	med	med	5		JB	1056
2017-06-17	3	B	Quad	5	clo	clo	0		JB	0
2017-06-17	3	B	Quad	5	ox	ox	0		JB	0
2017-06-17	3	B	Quad	5	g1	g1	1		JB	211.2
2017-06-17	3	C	Quad	1	pop	pop	3		JB	633.6
2017-06-17	3	C	Sub-s	1	cam	cam	50	0.5	JB	21120
2017-06-17	3	C	Quad	1	fd	fd	0		JB	0
2017-06-17	3	C	Quad	1	med	med	14		JB	2956.8
2017-06-17	3	C	Quad	1	clo	clo	0		JB	0
2017-06-17	3	C	Quad	1	g1	g1	5		JB	1056
2017-06-17	3	C	Quad	1	ox	ox	0		JB	0
2017-06-17	3	C	Quad	2	pop	pop	2		JB	422.4
2017-06-17	3	C	Quad	2	cam	cam	0		JB	0
2017-06-17	3	C	Quad	2	fd	fd	2		JB	422.4
2017-06-17	3	C	Quad	2	med	med	34		JB	7180.8
2017-06-17	3	C	Quad	2	clo	clo	0		JB	0
2017-06-17	3	C	Quad	2	ox	ox	0		JB	0
2017-06-17	3	C	Quad	3	g1	g1	7		JB	1478.4
2017-06-17	3	C	Quad	3	pop	pop	0		JB	0
2017-06-17	3	C	Quad	3	cam	cam	16		JB	3379.2
2017-06-17	3	C	Quad	3	fd	fd	8		JB	1689.6
2017-06-17	3	C	Quad	3	med	med	3		JB	633.6
2017-06-17	3	C	Quad	3	clo	clo	0		JB	0
2017-06-17	3	C	Quad	3	ox	ox	1		JB	211.2
2017-06-17	3	C	Quad	3	g1	g1	6		JB	1267.2
2017-06-17	3	C	Quad	4	pop	pop	11		JB	2323.2
2017-06-17	3	C	Quad	4	cam	cam	3		JB	633.6
2017-06-17	3	C	Quad	4	fd	fd	11		JB	2323.2
2017-06-17	3	C	Quad	4	med	med	19		JB	4012.8
2017-06-17	3	C	Quad	4	clo	clo	0		JB	0
2017-06-17	3	C	Quad	4	ox	ox	3		JB	633.6
2017-06-17	3	C	Quad	4	g1	g1	2		JB	422.4
2017-06-17	3	C	Quad	5	pop	pop	5		JB	1056
2017-06-17	3	C	Sub-s	5	cam	cam	32	0.5	JB	13516.8
2017-06-17	3	C	Quad	5	fd	fd	31		JB	6547.2
2017-06-17	3	C	Quad	5	med	med	0		JB	0
2017-06-17	3	C	Quad	5	clo	clo	0		JB	0
2017-06-17	3	C	Quad	5	ox	ox	0		JB	0
2017-06-17	3	C	Quad	5	g1	g1	0		JB	0
2017-06-17	3	D	Quad	1	pop	pop	0		EB	0
2017-06-17	3	D	Quad	1	cam	cam	6		EB	1267.2
2017-06-17	3	D	Quad	1	med	med	26		EB	5491.2
2017-06-17	3	D	Quad	1	fd	fd	4		EB	844.8
2017-06-17	3	D	Quad	1	g1	g1	12		EB	2534.4
2017-06-17	3	D	Quad	2	pop	pop	0		EB	0
2017-06-17	3	D	Quad	2	cam	cam	34		EB	7180.8
2017-06-17	3	D	Sub-s	2	med	med	35	0.5	EB	14784
2017-06-17	3	D	Quad	2	fd	fd	2		EB	422.4
2017-06-17	3	D	Quad	2	g1	g1	18		EB	3801.6
2017-06-17	3	D	Quad	3	pop	pop	12		EB	2534.4
2017-06-17	3	D	Quad	3	cam	cam	85		EB	17952
2017-06-17	3	D	Quad	3	med	med	10		EB	2112
2017-06-17	3	D	Quad	3	fd	fd	0		EB	0
2017-06-17	3	D	Quad	3	g1	g1	25		EB	5280
2017-06-17	3	D	Quad	4	pop	pop	7		EB	1478.4
2017-06-17	3	D	Quad	4	cam	cam	28		EB	5913.6
2017-06-17	3	D	Quad	4	fd	fd	0		EB	0
2017-06-17	3	D	Quad	4	med	med	9		EB	1900.8
2017-06-17	3	D	Quad	4	g1	g1	18		EB	3801.6
2017-06-17	3	D	Quad	5	pop	pop	4		EB	844.8
2017-06-17	3	D	Quad	5	cam	cam	58		EB	12249.6
2017-06-17	3	D	Quad	5	med	med	4		EB	844.8
2017-06-17	3	D	Quad	5	g1	g1	9		EB	1900.8
2017-06-17	3	D	Quad	5	fd	fd	6		EB	1267.2
2017-06-17	3	E	Quad	1	pop	pop	6		EB	1267.2
2017-06-17	3	E	Quad	1	cam	cam	37		EB	7814.4
2017-06-17	3	E	Sub-s	1	med	med	31	0.3	EB	21824
2017-06-17	3	E	Quad	1	g1	g1	11		EB	2323.2
2017-06-17	3	E	Quad	1	fd	fd	0		EB	0
2017-06-17	3	E	Quad	2	pop	pop	1		EB	211.2
2017-06-17	3	E	Quad	2	cam	cam	29		EB	6124.8
2017-06-17	3	E	Quad	2	med	med	23		EB	4857.6
2017-06-17	3	E	Quad	2	g1	g1	31		EB	6547.2
2017-06-17	3	E	Quad	2	fd	fd	2		EB	422.4
2017-06-17	3	E	Quad	3	pop	pop	5		EB	1056
2017-06-17	3	E	Quad	3	cam	cam	62		EB	13094.4
2017-06-17	3	E	Quad	3	med	med	11		EB	2323.2
2017-06-17	3	E	Quad	3	g1	g1	24		EB	5068.8
2017-06-17	3	E	Quad	3	fd	fd	11		EB	2323.2
2017-06-17	3	E	Quad	4	pop	pop	9		EB	1900.8
2017-06-17	3	E	Quad	4	cam	cam	120		EB	25344
2017-06-17	3	E	Quad	4	med	med	7		EB	1478.4
2017-06-17	3	E	Quad	4	g1	g1	21		EB	4435.2
2017-06-17	3	E	Quad	4	fd	fd	0		EB	0
2017-06-17	3	E	Quad	5	pop	pop	7		EB	1478.4
2017-06-17	3	E	Quad	5	cam	cam	134		EB	28300.8
2017-06-17	3	E	Quad	5	med	med	5		EB	1056
2017-06-17	3	E	Quad	5	g1	g1	15		EB	3168
2017-06-17	3	E	Quad	5	fd	fd	0		EB	0
2017-06-17	3	F	Quad	1	pop	pop	2		EB	422.4
2017-06-17	3	F	Quad	1	cam	cam	128		EB	27033.6
2017-06-17	3	F	Quad	1	med	med	6		EB	1267.2
2017-06-17	3	F	Quad	1	g1	g1	12		EB	2534.4
2017-06-17	3	F	Quad	1	fd	fd	15		EB	3168
2017-06-17	3	F	Quad	2	pop	pop	1		EB	211.2
2017-06-17	3	F	Quad	2	cam	cam	160		EB	33792
2017-06-17	3	F	Quad	2	med	med	12		EB	2534.4
2017-06-17	3	F	Quad	2	g1	g1	3		EB	633.6
2017-06-17	3	F	Quad	2	fd	fd	0		EB	0
2017-06-17	3	F	Quad	3	pop	pop	2		EB	422.4
2017-06-17	3	F	Quad	3	cam	cam	14		EB	2956.8
2017-06-17	3	F	Sub-s	3	med	med	14	0.2	EB	14784
2017-06-17	3	F	Quad	3	g1	g1	19		EB	4012.8
2017-06-17	3	F	Quad	3	fd	fd	0		EB	0
2017-06-17	3	F	Quad	4	pop	pop	2		EB	422.4
2017-06-17	3	F	Quad	4	cam	cam	88		EB	18585.6
2017-06-17	3	F	Sub-s	4	med	med	22	0.3	EB	15488
2017-06-17	3	F	Quad	4	g1	g1	15		EB	3168
2017-06-17	3	F	Quad	4	fd	fd	6		EB	1267.2
2017-06-17	3	F	Quad	5	pop	pop	0		EB	0
2017-06-17	3	F	Quad	5	cam	cam	43		EB	9081.6
2017-06-17	3	F	Quad	5	med	med	23		EB	4857.6
2017-06-17	3	F	Quad	5	g1	g1	28		EB	5913.6
2017-06-17	3	F	Quad	5	fd	fd	2		EB	422.4
2017-06-22	4	C	Quad	1	cam	cam	53		EB	11193.6
2017-06-22	4	C	Quad	1	fd	fd	7		EB	1478.4
2017-06-22	4	C	Quad	1	pop	pop	1		EB	211.2
2017-06-22	4	C	Quad	1	med	med	6		EB	1267.2
2017-06-22	4	C	Quad	1	g1	g1	0		EB	0
2017-06-22	4	C	Quad	1	ox	ox	0		EB	0
2017-06-22	4	C	Quad	1	clo	clo	0		EB	0
2017-06-22	4	C	Quad	2	cam	cam	170		EB	35904
2017-06-22	4	C	Quad	2	fd	fd	4		EB	844.8
2017-06-22	4	C	Quad	2	pop	pop	0		EB	0
2017-06-22	4	C	Sub-s	2	med	med	17	0.4	EB	8976
2017-06-22	4	C	Quad	2	g1	g1	0		EB	0
2017-06-22	4	C	Quad	2	ox	ox	0		EB	0
2017-06-22	4	C	Quad	2	clo	clo	0		EB	0
2017-06-22	4	C	Quad	3	cam	cam	19		EB	4012.8
2017-06-22	4	C	Quad	3	fd	fd	33		EB	6969.6
2017-06-22	4	C	Quad	3	pop	pop	1		EB	211.2
2017-06-22	4	C	Sub-s	3	med	med	21	0.5	EB	8870.4
2017-06-22	4	C	Quad	3	g1	g1	4		EB	844.8
2017-06-22	4	C	Quad	3	ox	ox	1		EB	211.2
2017-06-22	4	C	Quad	3	clo	clo	0		EB	0
2017-06-22	4	C	Quad	4	cam	cam	0		EB	0
2017-06-22	4	C	Quad	4	fd	fd	16		EB	3379.2
2017-06-22	4	C	Quad	4	pop	pop	4		EB	844.8
2017-06-22	4	C	Quad	4	med	med	5		EB	1056
2017-06-22	4	C	Quad	4	g1	g1	2		EB	422.4
2017-06-22	4	C	Quad	4	ox	ox	0		EB	0
2017-06-22	4	C	Quad	4	clo	clo	1		EB	211.2
2017-06-22	4	C	Quad	5	cam	cam	102		EB	21542.4
2017-06-22	4	C	Quad	5	fd	fd	0		EB	0
2017-06-22	4	C	Quad	5	pop	pop	4		EB	844.8
2017-06-22	4	C	Quad	5	med	med	5		EB	1056
2017-06-22	4	C	Quad	5	g1	g1	1		EB	211.2
2017-06-22	4	C	Quad	5	ox	ox	0		EB	0
2017-06-22	4	C	Quad	5	clo	clo	0		EB	0
2017-06-22	4	F	Quad	1	cam	cam	0		EB	0
2017-06-22	4	F	Quad	1	fd	fd	34		EB	7180.8
2017-06-22	4	F	Quad	1	pop	pop	0		EB	0
2017-06-22	4	F	Quad	1	med	med	25	0.4	EB	5280
2017-06-22	4	F	Quad	1	g1	g1	3		EB	633.6
2017-06-22	4	F	Quad	1	ox	ox	0		EB	0
2017-06-22	4	F	Quad	2	cam	cam	50		EB	10560
2017-06-22	4	F	Quad	2	fd	fd	1		EB	211.2
2017-06-22	4	F	Quad	2	pop	pop	2		EB	422.4
2017-06-22	4	F	Quad	2	med	med	2		EB	422.4
2017-06-22	4	F	Quad	2	g1	g1	0		EB	0
2017-06-22	4	F	Quad	2	ox	ox	0		EB	0
2017-06-22	4	F	Quad	3	cam	cam	43		EB	9081.6
2017-06-22	4	F	Quad	3	fd	fd	0		EB	0
2017-06-22	4	F	Quad	3	pop	pop	0		EB	0
2017-06-22	4	F	Sub-s	3	med	med	20	0.2	EB	21120
2017-06-22	4	F	Quad	3	g1	g1	7		EB	1478.4
2017-06-22	4	F	Quad	3	ox	ox	0		EB	0
2017-06-22	4	F	Quad	4	cam	cam	25		EB	5280
2017-06-22	4	F	Quad	4	fd	fd	12		EB	2534.4
2017-06-22	4	F	Quad	4	pop	pop	1		EB	211.2
2017-06-22	4	F	Quad	4	med	med	14		EB	2956.8
2017-06-22	4	F	Quad	4	g1	g1	6		EB	1267.2
2017-06-22	4	F	Quad	4	ox	ox	0		EB	0
2017-06-22	4	F	Quad	5	cam	cam	22		EB	4646.4
2017-06-22	4	F	Quad	5	fd	fd	15		EB	3168
2017-06-22	4	F	Quad	5	pop	pop	1		EB	211.2
2017-06-22	4	F	Quad	5	med	med	26	0.5	EB	5491.2
2017-06-22	4	F	Quad	5	g1	g1	3		EB	633.6
2017-06-22	4	F	Quad	5	ox	ox	0		EB	0
2017-06-22	4	F	Entire	All	clo	clo	10		EB	10
2017-06-22	4	D	Quad	1	cam	cam	74		EB	15628.8
2017-06-22	4	D	Quad	1	fd	fd	0		EB	0
2017-06-22	4	D	Quad	1	pop	pop	1		EB	211.2
2017-06-22	4	D	Quad	1	med	med	15		EB	3168
2017-06-22	4	D	Quad	1	g1	g1	4		EB	844.8
2017-06-22	4	D	Quad	1	ox	ox	0		EB	0
2017-06-22	4	D	Quad	2	cam	cam	3		EB	633.6
2017-06-22	4	D	Quad	2	fd	fd	2		EB	422.4
2017-06-22	4	D	Quad	2	pop	pop	1		EB	211.2
2017-06-22	4	D	Sub-s	2	med	med	17	0.5	EB	7180.8
2017-06-22	4	D	Quad	2	g1	g1	0		EB	0
2017-06-22	4	D	Quad	2	ox	ox	3		EB	633.6
2017-06-22	4	D	Quad	3	cam	cam	43		EB	9081.6
2017-06-22	4	D	Quad	3	fd	fd	5		EB	1056
2017-06-22	4	D	Quad	3	pop	pop	0		EB	0
2017-06-22	4	D	Quad	3	med	med	32		EB	6758.4
2017-06-22	4	D	Quad	3	g1	g1	3		EB	633.6
2017-06-22	4	D	Quad	3	ox	ox	5		EB	1056
2017-06-22	4	D	Quad	4	cam	cam	36		EB	7603.2
2017-06-22	4	D	Quad	4	fd	fd	0		EB	0
2017-06-22	4	D	Quad	4	pop	pop	0		EB	0
2017-06-22	4	D	Quad	4	med	med	6		EB	1267.2
2017-06-22	4	D	Quad	4	g1	g1	6		EB	1267.2
2017-06-22	4	D	Quad	4	ox	ox	0		EB	0
2017-06-22	4	D	Quad	5	cam	cam	40		EB	8448
2017-06-22	4	D	Quad	5	fd	fd	4		EB	844.8
2017-06-22	4	D	Quad	5	pop	pop	3		EB	633.6
2017-06-22	4	D	Sub-s	5	med	med	16	0.5	EB	6758.4
2017-06-22	4	D	Quad	5	g1	g1	9		EB	1900.8
2017-06-22	4	D	Quad	5	ox	ox	0		EB	0
2017-06-22	4	D	Entire	All	clo	r clo	4		EB	4
2017-06-22	4	D	Entire	All	clo	w clo	6		EB	6
2017-06-22	4	B	Quad	1	pop	pop	0		JB	0
2017-06-22	4	B	Quad	1	cam	cam	57		JB	12038.4
2017-06-22	4	B	Quad	1	med	med	12		JB	2534.4
2017-06-22	4	B	Quad	1	g1	g1	2		JB	422.4
2017-06-22	4	B	Quad	2	pop	pop	0		JB	0
2017-06-22	4	B	Quad	2	cam	cam	62		JB	13094.4
2017-06-22	4	B	Quad	2	med	med	1		JB	211.2
2017-06-22	4	B	Quad	2	g1	g1	3		JB	633.6
2017-06-22	4	B	Quad	3	pop	pop	0		JB	0
2017-06-22	4	B	Quad	3	cam	cam	27		JB	5702.4
2017-06-22	4	B	Quad	3	med	med	22		JB	4646.4
2017-06-22	4	B	Quad	3	g1	g1	4		JB	844.8
2017-06-22	4	B	Quad	4	pop	pop	5		JB	1056
2017-06-22	4	B	Quad	4	cam	cam	22		JB	4646.4
2017-06-22	4	B	Quad	4	med	med	24		JB	5068.8
2017-06-22	4	B	Quad	4	g1	g1	6		JB	1267.2
2017-06-22	4	B	Quad	5	pop	pop	1		JB	211.2
2017-06-22	4	B	Quad	5	cam	cam	44		JB	9292.8
2017-06-22	4	B	Quad	5	med	med	34		JB	7180.8
2017-06-22	4	B	Quad	5	g1	g1	2		JB	422.4
2017-06-22	4	A	Quad	1	pop	pop	2		JB	422.4
2017-06-22	4	A	Quad	1	cam	cam	38		JB	8025.6
2017-06-22	4	A	Quad	1	med	med	10		JB	2112
2017-06-22	4	A	Quad	1	g1	g1	4		JB	844.8
2017-06-22	4	A	Quad	1	fd	fd	0		JB	0
2017-06-22	4	A	Quad	2	pop	pop	8		JB	1689.6
2017-06-22	4	A	Quad	2	cam	cam	21		JB	4435.2
2017-06-22	4	A	Quad	2	med	med	14		JB	2956.8
2017-06-22	4	A	Quad	2	g1	g1	1		JB	211.2
2017-06-22	4	A	Quad	2	fd	fd	4		JB	844.8
2017-06-22	4	A	Quad	3	pop	pop	9		JB	1900.8
2017-06-22	4	A	Quad	3	cam	cam	41		JB	8659.2
2017-06-22	4	A	Quad	3	med	med	6		JB	1267.2
2017-06-22	4	A	Quad	3	g1	g1	0		JB	0
2017-06-22	4	A	Quad	3	fd	fd	12		JB	2534.4
2017-06-22	4	A	Quad	4	pop	pop	4		JB	844.8
2017-06-22	4	A	Quad	4	cam	cam	81		JB	17107.2
2017-06-22	4	A	Quad	4	med	med	12		JB	2534.4
2017-06-22	4	A	Quad	4	g1	g1	1		JB	211.2
2017-06-22	4	A	Quad	4	fd	fd	6		JB	1267.2
2017-06-22	4	A	Quad	5	pop	pop	5		JB	1056
2017-06-22	4	A	Quad	5	cam	cam	65		JB	13728
2017-06-22	4	A	Quad	5	med	med	27		JB	5702.4
2017-06-22	4	A	Quad	5	g1	g1	1		JB	211.2
2017-06-22	4	A	Quad	5	fd	fd	5		JB	1056
2017-06-22	4	E	Quad	1	pop	pop	1		JB	211.2
2017-06-22	4	E	Quad	1	cam	cam	0		JB	0
2017-06-22	4	E	Quad	1	med	med	36		JB	7603.2
2017-06-22	4	E	Quad	1	g1	g1	3		JB	633.6
2017-06-22	4	E	Quad	1	fd	fd	24		JB	5068.8
2017-06-22	4	E	Quad	2	pop	pop	2		JB	422.4
2017-06-22	4	E	Quad	2	cam	cam	43		JB	9081.6
2017-06-22	4	E	Quad	2	med	med	34		JB	7180.8
2017-06-22	4	E	Quad	2	g1	g1	0		JB	0
2017-06-22	4	E	Quad	2	fd	fd	4		JB	844.8
2017-06-22	4	E	Quad	3	pop	pop	4		JB	844.8
2017-06-22	4	E	Sub-s	3	cam	cam	43	0.5	JB	18163.2
2017-06-22	4	E	Quad	3	med	med	35		JB	7392
2017-06-22	4	E	Quad	3	g1	g1	2		JB	422.4
2017-06-22	4	E	Quad	3	fd	fd	0		JB	0
2017-06-22	4	E	Quad	4	pop	pop	2		JB	422.4
2017-06-22	4	E	Quad	4	cam	cam	24		JB	5068.8
2017-06-22	4	E	Quad	4	med	med	62		JB	13094.4
2017-06-22	4	E	Quad	4	g1	g1	5		JB	1056
2017-06-22	4	E	Quad	4	fd	fd	0		JB	0
2017-06-22	4	E	Quad	5	pop	pop	2		JB	422.4
2017-06-22	4	E	Quad	5	cam	cam	35		JB	7392
2017-06-22	4	E	Quad	5	med	med	58		JB	12249.6
2017-06-22	4	E	Quad	5	g1	g1	3		JB	633.6
2017-06-22	4	E	Quad	5	fd	fd	1		JB	211.2
2017-06-25	5	A	Quad	1	pop	pop	13		JB	2745.6
2017-06-25	5	A	Sub-s	1	cam	cam	64	0.5	JB	27033.6
2017-06-25	5	A	Quad	1	med	med	7		JB	1478.4
2017-06-25	5	A	Quad	1	fd	fd	0		JB	0
2017-06-25	5	A	Quad	2	pop	pop	15		JB	3168
2017-06-25	5	A	Quad	2	cam	cam	12		JB	2534.4
2017-06-25	5	A	Quad	2	med	med	0		JB	0
2017-06-25	5	A	Quad	2	fd	fd	6		JB	1267.2
2017-06-25	5	A	Quad	3	pop	pop	8		JB	1689.6
2017-06-25	5	A	Sub-s	3	cam	cam	43	0.5	JB	18163.2
2017-06-25	5	A	Quad	3	med	med	0		JB	0
2017-06-25	5	A	Quad	3	fd	fd	11		JB	2323.2
2017-06-25	5	A	Quad	4	pop	pop	9		JB	1900.8
2017-06-25	5	A	Quad	4	cam	cam	42		JB	8870.4
2017-06-25	5	A	Quad	4	med	med	24		JB	5068.8
2017-06-25	5	A	Quad	4	fd	fd	7		JB	1478.4
2017-06-25	5	A	Quad	5	pop	pop	0		JB	0
2017-06-25	5	A	Quad	5	cam	cam	5		JB	1056
2017-06-25	5	A	Quad	5	med	med	36		JB	7603.2
2017-06-25	5	A	Quad	5	fd	fd	12		JB	2534.4
2017-06-25	5	A	Entire	All	ox	ox	22		JB	22
2017-06-25	5	A	Entire	All	clo	clo	0		JB	0
2017-06-25	5	B	Quad	1	pop	pop	1		JB	211.2
2017-06-25	5	B	Sub-s	1	cam	cam	59	0.5	JB	24921.6
2017-06-25	5	B	Quad	1	med	med	2		JB	422.4
2017-06-25	5	B	Quad	1	fd	fd	0		JB	0
2017-06-25	5	B	Quad	2	pop	pop	0		JB	0
2017-06-25	5	B	Quad	2	cam	cam	26		JB	5491.2
2017-06-25	5	B	Quad	2	med	med	6		JB	1267.2
2017-06-25	5	B	Quad	2	fd	fd	15		JB	3168
2017-06-25	5	B	Quad	3	pop	pop	1		JB	211.2
2017-06-25	5	B	Quad	3	cam	cam	27		JB	5702.4
2017-06-25	5	B	Quad	3	med	med	42		JB	8870.4
2017-06-25	5	B	Quad	3	fd	fd	0		JB	0
2017-06-25	5	B	Quad	4	pop	pop	2		JB	422.4
2017-06-25	5	B	Quad	4	cam	cam	57		JB	12038.4
2017-06-25	5	B	Quad	4	med	med	2		JB	422.4
2017-06-25	5	B	Quad	4	fd	fd	0		JB	0
2017-06-25	5	B	Quad	5	pop	pop	0		JB	0
2017-06-25	5	B	Quad	5	cam	cam	41		JB	8659.2
2017-06-25	5	B	Quad	5	med	med	39		JB	8236.8
2017-06-25	5	B	Quad	5	fd	fd	0		JB	0
2017-06-25	5	B	Entire	All	ox	ox	10		JB	10
2017-06-25	5	B	Entire	All	clo	clo	0		JB	0
2017-06-25	5	C	Quad	1	pop	pop	4		JB	844.8
2017-06-25	5	C	Sub-s	1	cam	cam	51	0.5	JB	21542.4
2017-06-25	5	C	Quad	1	med	med	12		JB	2534.4
2017-06-25	5	C	Quad	1	fd	fd	0		JB	0
2017-06-25	5	C	Quad	2	pop	pop	6		JB	1267.2
2017-06-25	5	C	Quad	2	cam	cam	63		JB	13305.6
2017-06-25	5	C	Quad	2	med	med	39		JB	8236.8
2017-06-25	5	C	Quad	2	fd	fd	0		JB	0
2017-06-25	5	C	Quad	3	pop	pop	7		JB	1478.4
2017-06-25	5	C	Sub-s	3	cam	cam	49	0.5	JB	20697.6
2017-06-25	5	C	Quad	3	med	med	67		JB	14150.4
2017-06-25	5	C	Quad	3	fd	fd	18		JB	3801.6
2017-06-25	5	C	Quad	4	pop	pop	3		JB	633.6
2017-06-25	5	C	Sub-s	4	cam	cam	41	0.5	JB	17318.4
2017-06-25	5	C	Quad	4	med	med	39		JB	8236.8
2017-06-25	5	C	Quad	4	fd	fd	3		JB	633.6
2017-06-25	5	C	Quad	5	pop	pop	4		JB	844.8
2017-06-25	5	C	Quad	5	cam	cam	0		JB	0
2017-06-25	5	C	Quad	5	med	med	0		JB	0
2017-06-25	5	C	Quad	5	fd	fd	59		JB	12460.8
2017-06-25	5	C	Entire	All	ox	ox	11		JB	11
2017-06-25	5	C	Entire	All	clo	clo	7		JB	7
2017-06-25	5	E	Quad	1	pop	pop	2		EB	422.4
2017-06-25	5	E	Quad	1	cam	cam	45		EB	9504
2017-06-25	5	E	Sub-s	1	med	med	18	0.4	EB	9504
2017-06-25	5	E	Quad	1	fd	fd	2		EB	422.4
2017-06-25	5	E	Quad	2	pop	pop	0		EB	0
2017-06-25	5	E	Quad	2	cam	cam	94		EB	19852.8
2017-06-25	5	E	Sub-s	2	med	med	13	0.3	EB	9152
2017-06-25	5	E	Quad	2	fd	fd	1		EB	211.2
2017-06-25	5	E	Quad	3	pop	pop	5		EB	1056
2017-06-25	5	E	Quad	3	cam	cam	173		EB	36537.6
2017-06-25	5	E	Quad	3	med	med	17		EB	3590.4
2017-06-25	5	E	Quad	3	fd	fd	0		EB	0
2017-06-25	5	E	Quad	4	pop	pop	2		EB	422.4
2017-06-25	5	E	Quad	4	cam	cam	131		EB	27667.2
2017-06-25	5	E	Sub-s	4	med	med	17	0.5	EB	7180.8
2017-06-25	5	E	Quad	4	fd	fd	0		EB	0
2017-06-25	5	E	Quad	5	pop	pop	2		EB	422.4
2017-06-25	5	E	Quad	5	cam	cam	72		EB	15206.4
2017-06-25	5	E	Quad	5	med	med	34		EB	7180.8
2017-06-25	5	E	Quad	5	fd	fd	0		EB	0
2017-06-25	5	D	Quad	1	pop	pop	8		EB	1689.6
2017-06-25	5	D	Quad	1	cam	cam	0		EB	0
2017-06-25	5	D	Quad	1	med	med	20		EB	4224
2017-06-25	5	D	Quad	1	g1	g1	0		EB	0
2017-06-25	5	D	Quad	1	fd	fd	1		EB	211.2
2017-06-25	5	D	Quad	1	ox	ox	5		EB	1056
2017-06-25	5	D	Quad	2	pop	pop	0		EB	0
2017-06-25	5	D	Quad	2	cam	cam	0		EB	0
2017-06-25	5	D	Quad	2	med	med	63		EB	13305.6
2017-06-25	5	D	Quad	2	g1	g1	0		EB	0
2017-06-25	5	D	Quad	2	fd	fd	3		EB	633.6
2017-06-25	5	D	Quad	2	ox	ox	0		EB	0
2017-06-25	5	D	Quad	3	pop	pop	0		EB	0
2017-06-25	5	D	Quad	3	cam	cam	63		EB	13305.6
2017-06-25	5	D	Quad	3	med	med	19		EB	4012.8
2017-06-25	5	D	Quad	3	g1	g1	1		EB	211.2
2017-06-25	5	D	Quad	3	fd	fd	3		EB	633.6
2017-06-25	5	D	Quad	3	ox	ox	0		EB	0
2017-06-25	5	D	Quad	4	pop	pop	3		EB	633.6
2017-06-25	5	D	Quad	4	cam	cam	100		EB	21120
2017-06-25	5	D	Quad	4	med	med	20		EB	4224
2017-06-25	5	D	Quad	4	g1	g1	0		EB	0
2017-06-25	5	D	Quad	4	fd	fd	1		EB	211.2
2017-06-25	5	D	Quad	4	ox	ox	0		EB	0
2017-06-25	5	D	Quad	5	pop	pop	1		EB	211.2
2017-06-25	5	D	Quad	5	cam	cam	59		EB	12460.8
2017-06-25	5	D	Quad	5	med	med	50		EB	10560
2017-06-25	5	D	Quad	5	g1	g1	0		EB	0
2017-06-25	5	D	Quad	5	fd	fd	2		EB	422.4
2017-06-25	5	D	Quad	5	ox	ox	0		EB	0
2017-06-25	5	D	Entire	All	clo	clo	15		EB	15
2017-06-25	5	F	Quad	1	pop	pop	0		EB	0
2017-06-25	5	F	Quad	1	cam	cam	30		EB	6336
2017-06-25	5	F	Quad	1	med	med	51		EB	10771.2
2017-06-25	5	F	Quad	1	fd	fd	17		EB	3590.4
2017-06-25	5	F	Quad	2	pop	pop	5		EB	1056
2017-06-25	5	F	Quad	2	cam	cam	0		EB	0
2017-06-25	5	F	Quad	2	med	med	0		EB	0
2017-06-25	5	F	Quad	2	fd	fd	78		EB	16473.6
2017-06-25	5	F	Quad	3	pop	pop	2		EB	422.4
2017-06-25	5	F	Quad	3	cam	cam	72		EB	15206.4
2017-06-25	5	F	Sub-s	3	med	med	23	0.2	EB	24288
2017-06-25	5	F	Quad	3	fd	fd	3		EB	633.6
2017-06-25	5	F	Quad	4	pop	pop	0		EB	0
2017-06-25	5	F	Quad	4	cam	cam	40		EB	8448
2017-06-25	5	F	Sub-s	4	med	med	14	0.5	EB	5913.6
2017-06-25	5	F	Quad	4	fd	fd	0		EB	0
2017-06-25	5	F	Quad	5	pop	pop	2		EB	422.4
2017-06-25	5	F	Quad	5	cam	cam	11		EB	2323.2
2017-06-25	5	F	Sub-s	5	med	med	35	0.4	EB	18480
2017-06-25	5	F	Quad	5	fd	fd	0		EB	0
2017-06-25	5	F	Entire	All	ox	ox	40		EB	40
2017-06-25	5	F	Entire	All	clo	clo	10		EB	10
2017-06-29	6	A	Quad	1	pop	pop	10		JB	2112
2017-06-29	6	A	Sub-s	1	cam	cam	104	0.5	JB	43929.6
2017-06-29	6	A	Quad	1	med	med	0		JB	0
2017-06-29	6	A	Quad	1	fd	fd	0		JB	0
2017-06-29	6	A	Quad	2	pop	pop	11		JB	2323.2
2017-06-29	6	A	Quad	2	cam	cam	64		JB	13516.8
2017-06-29	6	A	Quad	2	med	med	9		JB	1900.8
2017-06-29	6	A	Quad	2	fd	fd	0		JB	0
2017-06-29	6	A	Quad	3	pop	pop	0		JB	0
2017-06-29	6	A	Quad	3	cam	cam	48		JB	10137.6
2017-06-29	6	A	Quad	3	med	med	34		JB	7180.8
2017-06-29	6	A	Quad	3	fd	fd	0		JB	0
2017-06-29	6	A	Quad	4	pop	pop	5		JB	1056
2017-06-29	6	A	Sub-s	4	cam	cam	92	0.5	JB	38860.8
2017-06-29	6	A	Quad	4	med	med	5		JB	1056
2017-06-29	6	A	Quad	4	fd	fd	3		JB	633.6
2017-06-29	6	A	Quad	5	pop	pop	6		JB	1267.2
2017-06-29	6	A	Quad	5	cam	cam	36		JB	7603.2
2017-06-29	6	A	Quad	5	med	med	9		JB	1900.8
2017-06-29	6	A	Quad	5	fd	fd	42		JB	8870.4
2017-06-29	6	A	Entire	All	ox	ox	21		JB	21
2017-06-29	6	A	Entire	All	clo	r clo	1		JB	1
2017-06-29	6	A	Entire	All	clo	w clo	10		JB	10
2017-06-29	6	A	Entire	All	kw	kw	1		JB	1
2017-06-29	6	B	Quad	1	pop	pop	5		JB	1056
2017-06-29	6	B	Sub-s	1	cam	cam	50	0.5	JB	21120
2017-06-29	6	B	Quad	1	med	med	16		JB	3379.2
2017-06-29	6	B	Quad	1	fd	fd	0		JB	0
2017-06-29	6	B	Quad	2	pop	pop	1		JB	211.2
2017-06-29	6	B	Sub-s	2	cam	cam	57	0.5	JB	24076.8
2017-06-29	6	B	Quad	2	med	med	1		JB	211.2
2017-06-29	6	B	Quad	2	fd	fd	0		JB	0
2017-06-29	6	B	Quad	3	pop	pop	0		JB	0
2017-06-29	6	B	Quad	3	cam	cam	69		JB	14572.8
2017-06-29	6	B	Quad	3	med	med	6		JB	1267.2
2017-06-29	6	B	Quad	3	fd	fd	0		JB	0
2017-06-29	6	B	Quad	4	pop	pop	2		JB	422.4
2017-06-29	6	B	Quad	4	cam	cam	41		JB	8659.2
2017-06-29	6	B	Quad	4	med	med	43		JB	9081.6
2017-06-29	6	B	Quad	4	fd	fd	0		JB	0
2017-06-29	6	B	Quad	5	pop	pop	2		JB	422.4
2017-06-29	6	B	Quad	5	cam	cam	43		JB	9081.6
2017-06-29	6	B	Quad	5	med	med	0		JB	0
2017-06-29	6	B	Quad	5	fd	fd	0		JB	0
2017-06-29	6	B	Entire	All	ox	ox	10		JB	10
2017-06-29	6	B	Entire	All	clo	r clo	3		JB	3
2017-06-29	6	B	Entire	All	clo	w clo	1		JB	1
2017-06-29	6	B	Entire	All	kw	kw	3		JB	3
2017-06-29	6	F	Quad	1	pop	pop	0		JB	0
2017-06-29	6	F	Sub-s	1	cam	cam	27	0.5	JB	11404.8
2017-06-29	6	F	Sub-s	1	med	med	34	0.25	JB	28723.2
2017-06-29	6	F	Quad	1	fd	fd	1		JB	211.2
2017-06-29	6	F	Quad	2	pop	pop	3		JB	633.6
2017-06-29	6	F	Sub-s	2	cam	cam	59	0.5	JB	24921.6
2017-06-29	6	F	Quad	2	med	med	22		JB	4646.4
2017-06-29	6	F	Quad	2	fd	fd	0		JB	0
2017-06-29	6	F	Quad	3	pop	pop	0		JB	0
2017-06-29	6	F	Quad	3	cam	cam	85		JB	17952
2017-06-29	6	F	Quad	3	med	med	21		JB	4435.2
2017-06-29	6	F	Quad	3	fd	fd	1		JB	211.2
2017-06-29	6	F	Quad	4	pop	pop	1		JB	211.2
2017-06-29	6	F	Quad	4	cam	cam	78		JB	16473.6
2017-06-29	6	F	Quad	4	med	med	0		JB	0
2017-06-29	6	F	Quad	4	fd	fd	0		JB	0
2017-06-29	6	F	Quad	5	pop	pop	1		JB	211.2
2017-06-29	6	F	Quad	5	cam	cam	55		JB	11616
2017-06-29	6	F	Quad	5	med	med	43		JB	9081.6
2017-06-29	6	F	Quad	5	fd	fd	1		JB	211.2
2017-06-29	6	F	Entire	All	ox	ox	57		JB	57
2017-06-29	6	F	Entire	All	clo	r clo	11		JB	11
2017-06-29	6	F	Entire	All	clo	w clo	18		JB	18
2017-06-29	6	F	Entire	All	kw	kw	2		JB	2
2017-06-29	6	D	Quad	1	cam	cam	1		EB	211.2
2017-06-29	6	D	Quad	1	pop	pop	6		EB	1267.2
2017-06-29	6	D	Quad	1	med	med	0		EB	0
2017-06-29	6	D	Quad	1	g1	g1	1		EB	211.2
2017-06-29	6	D	Quad	1	fd	fd	0		EB	0
2017-06-29	6	D	Quad	2	cam	cam	115		EB	24288
2017-06-29	6	D	Quad	2	pop	pop	2		EB	422.4
2017-06-29	6	D	Sub-s	2	med	med	37	0.5	EB	15628.8
2017-06-29	6	D	Quad	2	g1	g1	0		EB	0
2017-06-29	6	D	Quad	2	fd	fd	3		EB	633.6
2017-06-29	6	D	Quad	3	cam	cam	22		EB	4646.4
2017-06-29	6	D	Quad	3	pop	pop	2		EB	422.4
2017-06-29	6	D	Quad	3	med	med	25		EB	5280
2017-06-29	6	D	Quad	3	g1	g1	0		EB	0
2017-06-29	6	D	Quad	3	fd	fd	1		EB	211.2
2017-06-29	6	D	Quad	4	cam	cam	0		EB	0
2017-06-29	6	D	Quad	4	pop	pop	5		EB	1056
2017-06-29	6	D	Quad	4	med	med	2		EB	422.4
2017-06-29	6	D	Quad	4	g1	g1	0		EB	0
2017-06-29	6	D	Quad	4	fd	fd	0		EB	0
2017-06-29	6	D	Quad	5	cam	cam	25		EB	5280
2017-06-29	6	D	Quad	5	pop	pop	5		EB	1056
2017-06-29	6	D	Quad	5	med	med	5		EB	1056
2017-06-29	6	D	Quad	5	g1	g1	0		EB	0
2017-06-29	6	D	Quad	5	fd	fd	0		EB	0
2017-06-29	6	D	Entire	All	ox	ox	35		EB	35
2017-06-29	6	D	Entire	All	clo	w clo	23		EB	23
2017-06-29	6	D	Entire	All	clo	r clo	22		EB	22
2017-06-29	6	E	Quad	1	fd	fd	0		EB	0
2017-06-29	6	E	Quad	1	cam	cam	22		EB	4646.4
2017-06-29	6	E	Quad	1	pop	pop	6		EB	1267.2
2017-06-29	6	E	Quad	1	med	med	5		EB	1056
2017-06-29	6	E	Quad	2	fd	fd	0		EB	0
2017-06-29	6	E	Quad	2	cam	cam	54		EB	11404.8
2017-06-29	6	E	Quad	2	pop	pop	3		EB	633.6
2017-06-29	6	E	Sub-s	2	med	med	40	0.5	EB	16896
2017-06-29	6	E	Quad	3	fd	fd	2		EB	422.4
2017-06-29	6	E	Quad	3	cam	cam	46		EB	9715.2
2017-06-29	6	E	Quad	3	pop	pop	2		EB	422.4
2017-06-29	6	E	Sub-s	3	med	med	44	0.5	EB	18585.6
2017-06-29	6	E	Quad	4	fd	fd	0		EB	0
2017-06-29	6	E	Quad	4	cam	cam	100		EB	21120
2017-06-29	6	E	Quad	4	pop	pop	5		EB	1056
2017-06-29	6	E	Sub-s	4	med	med	16	0.5	EB	6758.4
2017-06-29	6	E	Quad	5	fd	fd	0		EB	0
2017-06-29	6	E	Quad	5	cam	cam	66		EB	13939.2
2017-06-29	6	E	Quad	5	pop	pop	2		EB	422.4
2017-06-29	6	E	Quad	5	med	med	18		EB	3801.6
2017-06-29	6	E	Entire	All	ox	ox	31		EB	31
2017-06-29	6	E	Entire	All	clo	r clo	9		EB	9
2017-06-29	6	E	Entire	All	clo	w clo	14		EB	14
2017-06-29	6	E	Entire	All	kw	kw	4		EB	4
2017-06-29	6	C	Quad	1	fd	fd	12		EB	2534.4
2017-06-29	6	C	Quad	1	cam	cam	51		EB	10771.2
2017-06-29	6	C	Quad	1	pop	pop	0		EB	0
2017-06-29	6	C	Sub-s	1	med	med	20	0.5	EB	8448
2017-06-29	6	C	Quad	2	fd	fd	0		EB	0
2017-06-29	6	C	Quad	2	cam	cam	145		EB	30624
2017-06-29	6	C	Quad	2	pop	pop	0		EB	0
2017-06-29	6	C	Quad	2	med	med	1		EB	211.2
2017-06-29	6	C	Quad	3	fd	fd	3		EB	633.6
2017-06-29	6	C	Quad	3	cam	cam	120		EB	25344
2017-06-29	6	C	Quad	3	pop	pop	0		EB	0
2017-06-29	6	C	Sub-s	3	med	med	33	0.6	EB	11616
2017-06-29	6	C	Quad	4	fd	fd	3		EB	633.6
2017-06-29	6	C	Quad	4	cam	cam	51		EB	10771.2
2017-06-29	6	C	Quad	4	pop	pop	3		EB	633.6
2017-06-29	6	C	Quad	4	med	med	30		EB	6336
2017-06-29	6	C	Quad	5	fd	fd	0		EB	0
2017-06-29	6	C	Quad	5	cam	cam	120		EB	25344
2017-06-29	6	C	Quad	5	pop	pop	2		EB	422.4
2017-06-29	6	C	Quad	5	med	med	6		EB	1267.2
2017-06-29	6	C	Entire	All	ox	ox	5		EB	5
2017-06-29	6	C	Entire	All	clo	r clo	6		EB	6
2017-06-29	6	C	Entire	All	clo	w clo	5		EB	5
2017-06-29	6	C	Entire	All	kw	kw	0		EB	0
2017-06-29	6	C	Entire	All	yd	yd	44		EB	44
2017-07-03	7	A	Quad	1	pop	pop	5		JB	1056
2017-07-03	7	A	Sub-s	1	cam	cam	104	0.5	JB	43929.6
2017-07-03	7	A	Quad	1	med	med	0		JB	0
2017-07-03	7	A	Quad	1	fd	fd	0		JB	0
2017-07-03	7	A	Quad	2	pop	pop	5		JB	1056
2017-07-03	7	A	Quad	2	cam	cam	32		JB	6758.4
2017-07-03	7	A	Quad	2	med	med	24		JB	5068.8
2017-07-03	7	A	Quad	2	fd	fd	6		JB	1267.2
2017-07-03	7	A	Quad	3	pop	pop	9		JB	1900.8
2017-07-03	7	A	Quad	3	cam	cam	0		JB	0
2017-07-03	7	A	Quad	3	med	med	5		JB	1056
2017-07-03	7	A	Quad	3	fd	fd	54		JB	11404.8
2017-07-03	7	A	Quad	4	pop	pop	0		JB	0
2017-07-03	7	A	Sub-s	4	cam	cam	67	0.5	JB	28300.8
2017-07-03	7	A	Quad	4	med	med	4		JB	844.8
2017-07-03	7	A	Quad	4	fd	fd	0		JB	0
2017-07-03	7	A	Quad	5	pop	pop	5		JB	1056
2017-07-03	7	A	Quad	5	cam	cam	7		JB	1478.4
2017-07-03	7	A	Quad	5	med	med	35		JB	7392
2017-07-03	7	A	Quad	5	fd	fd	3		JB	633.6
2017-07-03	7	A	Entire	All	ox	ox	27		JB	27
2017-07-03	7	A	Entire	All	clo	r clo	1		JB	1
2017-07-03	7	A	Entire	All	clo	w clo	17		JB	17
2017-07-03	7	A	Entire	All	kw	kw	2		JB	2
2017-07-03	7	A	Entire	All	yd	yd	50		JB	50
2017-07-03	7	B	Quad	1	pop	pop	0		JB	0
2017-07-03	7	B	Sub-s	1	cam	cam	82	0.25	JB	69273.6
2017-07-03	7	B	Quad	1	med	med	0		JB	0
2017-07-03	7	B	Quad	1	fd	fd	0		JB	0
2017-07-03	7	B	Quad	2	pop	pop	0		JB	0
2017-07-03	7	B	Quad	2	cam	cam	51		JB	10771.2
2017-07-03	7	B	Quad	2	med	med	0		JB	0
2017-07-03	7	B	Quad	2	fd	fd	0		JB	0
2017-07-03	7	B	Quad	3	pop	pop	2		JB	422.4
2017-07-03	7	B	Quad	3	cam	cam	81		JB	17107.2
2017-07-03	7	B	Quad	3	med	med	37		JB	7814.4
2017-07-03	7	B	Quad	3	fd	fd	0		JB	0
2017-07-03	7	B	Quad	4	pop	pop	0		JB	0
2017-07-03	7	B	Quad	4	cam	cam	62		JB	13094.4
2017-07-03	7	B	Quad	4	med	med	11		JB	2323.2
2017-07-03	7	B	Quad	4	fd	fd	0		JB	0
2017-07-03	7	B	Quad	5	pop	pop	0		JB	0
2017-07-03	7	B	Quad	5	cam	cam	57		JB	12038.4
2017-07-03	7	B	Quad	5	med	med	29		JB	6124.8
2017-07-03	7	B	Quad	5	fd	fd	3		JB	633.6
2017-07-03	7	B	Entire	All	ox	ox	10		JB	10
2017-07-03	7	B	Entire	All	clo	r clo	7		JB	7
2017-07-03	7	B	Entire	All	clo	w clo	5		JB	5
2017-07-03	7	B	Entire	All	kw	kw	3		JB	3
2017-07-03	7	B	Entire	All	yd	yd	38		JB	38
2017-07-03	7	C	Quad	1	pop	pop	3		JB	633.6
2017-07-03	7	C	Quad	1	cam	cam	79		JB	16684.8
2017-07-03	7	C	Quad	1	med	med	0		JB	0
2017-07-03	7	C	Quad	1	fd	fd	0		JB	0
2017-07-03	7	C	Quad	2	pop	pop	1		JB	211.2
2017-07-03	7	C	Quad	2	cam	cam	43		JB	9081.6
2017-07-03	7	C	Quad	2	med	med	56		JB	11827.2
2017-07-03	7	C	Quad	2	fd	fd	0		JB	0
2017-07-03	7	C	Quad	3	pop	pop	0		JB	0
2017-07-03	7	C	Sub-s	3	cam	cam	42	0.5	JB	17740.8
2017-07-03	7	C	Quad	3	med	med	9		JB	1900.8
2017-07-03	7	C	Quad	3	fd	fd	22		JB	4646.4
2017-07-03	7	C	Quad	4	pop	pop	2		JB	422.4
2017-07-03	7	C	Quad	4	cam	cam	112		JB	23654.4
2017-07-03	7	C	Quad	4	med	med	19		JB	4012.8
2017-07-03	7	C	Quad	4	fd	fd	4		JB	844.8
2017-07-03	7	C	Quad	5	pop	pop	0		JB	0
2017-07-03	7	C	Sub-s	5	cam	cam	82	0.5	JB	34636.8
2017-07-03	7	C	Quad	5	med	med	0		JB	0
2017-07-03	7	C	Quad	5	fd	fd	7		JB	1478.4
2017-07-03	7	C	Entire	All	ox	ox	20		JB	20
2017-07-03	7	C	Entire	All	clo	r clo	13		JB	13
2017-07-03	7	C	Entire	All	clo	w clo	1		JB	1
2017-07-03	7	C	Entire	All	kw	kw	0		JB	0
2017-07-03	7	C	Entire	All	yd	yd	71		JB	71
2017-07-03	7	D	Quad	1	fd	fd	3		EB	633.6
2017-07-03	7	D	Quad	1	cam	cam	38		EB	8025.6
2017-07-03	7	D	Quad	1	pop	pop	1		EB	211.2
2017-07-03	7	D	Quad	1	med	med	24		EB	5068.8
2017-07-03	7	D	Quad	2	fd	fd	6		EB	1267.2
2017-07-03	7	D	Quad	2	cam	cam	5		EB	1056
2017-07-03	7	D	Quad	2	pop	pop	4		EB	844.8
2017-07-03	7	D	Quad	2	med	med	20		EB	4224
2017-07-03	7	D	Quad	3	fd	fd	0		EB	0
2017-07-03	7	D	Quad	3	cam	cam	37		EB	7814.4
2017-07-03	7	D	Quad	3	pop	pop	0		EB	0
2017-07-03	7	D	Quad	3	med	med	33		EB	6969.6
2017-07-03	7	D	Quad	4	fd	fd	7		EB	1478.4
2017-07-03	7	D	Quad	4	cam	cam	33		EB	6969.6
2017-07-03	7	D	Quad	4	pop	pop	2		EB	422.4
2017-07-03	7	D	Quad	4	med	med	42		EB	8870.4
2017-07-03	7	D	Quad	5	fd	fd	5		EB	1056
2017-07-03	7	D	Quad	5	cam	cam	9		EB	1900.8
2017-07-03	7	D	Quad	5	pop	pop	0		EB	0
2017-07-03	7	D	Quad	5	med	med	9		EB	1900.8
2017-07-03	7	D	Entire	All	clo	w clo	56		EB	56
2017-07-03	7	D	Entire	All	clo	r clo	37		EB	37
2017-07-03	7	D	Entire	All	yd	yd	25		EB	25
2017-07-03	7	D	Entire	All	ox	ox	42		EB	42
2017-07-03	7	E	Quad	1	fd	fd	0		EB	0
2017-07-03	7	E	Quad	1	cam	cam	93		EB	19641.6
2017-07-03	7	E	Quad	1	pop	pop	0		EB	0
2017-07-03	7	E	Quad	1	med	med	22		EB	4646.4
2017-07-03	7	E	Quad	2	fd	fd	0		EB	0
2017-07-03	7	E	Quad	2	cam	cam	25		EB	5280
2017-07-03	7	E	Quad	2	pop	pop	5		EB	1056
2017-07-03	7	E	Quad	2	med	med	49		EB	10348.8
2017-07-03	7	E	Quad	3	fd	fd	0		EB	0
2017-07-03	7	E	Quad	3	cam	cam	165		EB	34848
2017-07-03	7	E	Quad	3	pop	pop	0		EB	0
2017-07-03	7	E	Sub-s	3	med	med	16	0.5	EB	6758.4
2017-07-03	7	E	Quad	4	fd	fd	0		EB	0
2017-07-03	7	E	Quad	4	cam	cam	114		EB	24076.8
2017-07-03	7	E	Quad	4	pop	pop	0		EB	0
2017-07-03	7	E	Sub-s	4	med	med	30	0.5	EB	12672
2017-07-03	7	E	Quad	5	fd	fd	0		EB	0
2017-07-03	7	E	Quad	5	cam	cam	153		EB	32313.6
2017-07-03	7	E	Quad	5	pop	pop	2		EB	422.4
2017-07-03	7	E	Sub-s	5	med	med	16	0.5	EB	6758.4
2017-07-03	7	E	Entire	All	clo	w clo	37		EB	37
2017-07-03	7	E	Entire	All	clo	r clo	20		EB	20
2017-07-03	7	E	Entire	All	yd	yd	2		EB	2
2017-07-03	7	E	Entire	All	ox	ox	37		EB	37
2017-07-03	7	E	Entire	All	kw	kw	4		EB	4
2017-07-03	7	F	Quad	1	fd	fd	0		EB	0
2017-07-03	7	F	Quad	1	cam	cam	27		EB	5702.4
2017-07-03	7	F	Quad	1	pop	pop	0		EB	0
2017-07-03	7	F	Quad	1	ox	ox	1		EB	211.2
2017-07-03	7	F	Quad	1	med	med	20		EB	4224
2017-07-03	7	F	Quad	2	fd	fd	0		EB	0
2017-07-03	7	F	Quad	2	cam	cam	123		EB	25977.6
2017-07-03	7	F	Quad	2	pop	pop	1		EB	211.2
2017-07-03	7	F	Quad	2	ox	ox	1		EB	211.2
2017-07-03	7	F	Quad	2	med	med	26		EB	5491.2
2017-07-03	7	F	Quad	3	fd	fd	3		EB	633.6
2017-07-03	7	F	Quad	3	cam	cam	79		EB	16684.8
2017-07-03	7	F	Quad	3	pop	pop	0		EB	0
2017-07-03	7	F	Quad	3	ox	ox	0		EB	0
2017-07-03	7	F	Sub-s	3	med	med	23	0.5	EB	9715.2
2017-07-03	7	F	Quad	4	fd	fd	0		EB	0
2017-07-03	7	F	Quad	4	cam	cam	135		EB	28512
2017-07-03	7	F	Quad	4	pop	pop	0		EB	0
2017-07-03	7	F	Quad	4	ox	ox	0		EB	0
2017-07-03	7	F	Quad	4	med	med	27		EB	5702.4
2017-07-03	7	F	Quad	5	fd	fd	0		EB	0
2017-07-03	7	F	Quad	5	cam	cam	134		EB	28300.8
2017-07-03	7	F	Quad	5	pop	pop	0		EB	0
2017-07-03	7	F	Quad	5	ox	ox	0		EB	0
2017-07-03	7	F	Sub-s	5	med	med	9	0.5	EB	3801.6
2017-07-03	7	F	Entire	All	clo	w clo	54		EB	54
2017-07-03	7	F	Entire	All	clo	r clo	32		EB	32
2017-07-03	7	F	Entire	All	yd	yd	27		EB	27
2017-07-03	7	F	Entire	All	kw	kw	2		EB	2
2017-07-07	8	C	Quad	1	pop	pop	0		JB	0
2017-07-07	8	C	Sub-s	1	cam	cam	42	0.5	JB	17740.8
2017-07-07	8	C	Sub-s	1	med	med	26	0.5	JB	10982.4
2017-07-07	8	C	Quad	1	fd	fd	4		JB	844.8
2017-07-07	8	C	Quad	2	pop	pop	0		JB	0
2017-07-07	8	C	Quad	2	cam	cam	62		JB	13094.4
2017-07-07	8	C	Quad	2	med	med	22		JB	4646.4
2017-07-07	8	C	Quad	2	fd	fd	0		JB	0
2017-07-07	8	C	Quad	3	pop	pop	1		JB	211.2
2017-07-07	8	C	Quad	3	cam	cam	78		JB	16473.6
2017-07-07	8	C	Quad	3	med	med	15		JB	3168
2017-07-07	8	C	Quad	3	fd	fd	1		JB	211.2
2017-07-07	8	C	Quad	4	pop	pop	4		JB	844.8
2017-07-07	8	C	Sub-s	4	cam	cam	58	0.5	JB	24499.2
2017-07-07	8	C	Quad	4	med	med	0		JB	0
2017-07-07	8	C	Quad	4	fd	fd	0		JB	0
2017-07-07	8	C	Quad	5	pop	pop	0		JB	0
2017-07-07	8	C	Sub-s	5	cam	cam	52	0.5	JB	21964.8
2017-07-07	8	C	Quad	5	med	med	0		JB	0
2017-07-07	8	C	Quad	5	fd	fd	0		JB	0
2017-07-07	8	C	Entire	All	ox	ox	18		JB	18
2017-07-07	8	C	Entire	All	clo	r clo	36		JB	36
2017-07-07	8	C	Entire	All	clo	w clo	23		JB	23
2017-07-07	8	C	Entire	All	kw	kw	0		JB	0
2017-07-07	8	C	Entire	All	yd	yd	70		JB	70
2017-07-07	8	A	Quad	1	pop	pop	0		JB	0
2017-07-07	8	A	Sub-s	1	cam	cam	34	0.5	JB	14361.6
2017-07-07	8	A	Quad	1	med	med	9		JB	1900.8
2017-07-07	8	A	Quad	1	fd	fd	0		JB	0
2017-07-07	8	A	Quad	2	pop	pop	0		JB	0
2017-07-07	8	A	Quad	2	cam	cam	97		JB	20486.4
2017-07-07	8	A	Quad	2	med	med	15		JB	3168
2017-07-07	8	A	Quad	2	fd	fd	0		JB	0
2017-07-07	8	A	Quad	3	pop	pop	9		JB	1900.8
2017-07-07	8	A	Quad	3	cam	cam	49		JB	10348.8
2017-07-07	8	A	Quad	3	med	med	0		JB	0
2017-07-07	8	A	Quad	3	fd	fd	0		JB	0
2017-07-07	8	A	Quad	4	pop	pop	3		JB	633.6
2017-07-07	8	A	Quad	4	cam	cam	58		JB	12249.6
2017-07-07	8	A	Quad	4	med	med	28		JB	5913.6
2017-07-07	8	A	Quad	4	fd	fd	0		JB	0
2017-07-07	8	A	Quad	5	pop	pop	4		JB	844.8
2017-07-07	8	A	Quad	5	cam	cam	48		JB	10137.6
2017-07-07	8	A	Quad	5	med	med	2		JB	422.4
2017-07-07	8	A	Quad	5	fd	fd	0		JB	0
2017-07-07	8	A	Entire	All	ox	ox	12		JB	12
2017-07-07	8	A	Entire	All	clo	r clo	10		JB	10
2017-07-07	8	A	Entire	All	clo	w clo	23		JB	23
2017-07-07	8	A	Entire	All	kw	kw	4		JB	4
2017-07-07	8	A	Entire	All	yd	yd	66		JB	66
2017-07-07	8	B	Quad	1	pop	pop	0		JB	0
2017-07-07	8	B	Sub-s	1	cam	cam	71	0.5	JB	29990.4
2017-07-07	8	B	Quad	1	med	med	0		JB	0
2017-07-07	8	B	Quad	1	fd	fd	0		JB	0
2017-07-07	8	B	Quad	2	pop	pop	0		JB	0
2017-07-07	8	B	Quad	2	cam	cam	47		JB	9926.4
2017-07-07	8	B	Quad	2	med	med	0		JB	0
2017-07-07	8	B	Quad	2	fd	fd	0		JB	0
2017-07-07	8	B	Quad	3	pop	pop	0		JB	0
2017-07-07	8	B	Quad	3	cam	cam	89		JB	18796.8
2017-07-07	8	B	Quad	3	med	med	4		JB	844.8
2017-07-07	8	B	Quad	3	fd	fd	0		JB	0
2017-07-07	8	B	Quad	4	pop	pop	0		JB	0
2017-07-07	8	B	Quad	4	cam	cam	78		JB	16473.6
2017-07-07	8	B	Quad	4	med	med	18		JB	3801.6
2017-07-07	8	B	Quad	4	fd	fd	0		JB	0
2017-07-07	8	B	Quad	5	pop	pop	0		JB	0
2017-07-07	8	B	Quad	5	cam	cam	48		JB	10137.6
2017-07-07	8	B	Quad	5	med	med	0		JB	0
2017-07-07	8	B	Quad	5	fd	fd	0		JB	0
2017-07-07	8	B	Entire	All	ox	ox	14		JB	14
2017-07-07	8	B	Entire	All	clo	r clo	31		JB	31
2017-07-07	8	B	Entire	All	clo	w clo	16		JB	16
2017-07-07	8	B	Entire	All	kw	kw	1		JB	1
2017-07-07	8	B	Entire	All	yd	yd	61		JB	61
2017-07-07	8	D	Quad	1	fd	fd	0		EB	0
2017-07-07	8	D	Quad	1	cam	cam	15		EB	3168
2017-07-07	8	D	Quad	1	pop	pop	4		EB	844.8
2017-07-07	8	D	Quad	1	med	med	1		EB	211.2
2017-07-07	8	D	Quad	2	fd	fd	3		EB	633.6
2017-07-07	8	D	Quad	2	cam	cam	25		EB	5280
2017-07-07	8	D	Quad	2	pop	pop	0		EB	0
2017-07-07	8	D	Quad	2	med	med	45		EB	9504
2017-07-07	8	D	Quad	3	fd	fd	0		EB	0
2017-07-07	8	D	Quad	3	cam	cam	94		EB	19852.8
2017-07-07	8	D	Quad	3	pop	pop	0		EB	0
2017-07-07	8	D	Quad	3	med	med	2		EB	422.4
2017-07-07	8	D	Quad	4	fd	fd	0		EB	0
2017-07-07	8	D	Quad	4	cam	cam	21		EB	4435.2
2017-07-07	8	D	Quad	4	pop	pop	1		EB	211.2
2017-07-07	8	D	Quad	4	med	med	17		EB	3590.4
2017-07-07	8	D	Quad	5	fd	fd	0		EB	0
2017-07-07	8	D	Quad	5	cam	cam	13		EB	2745.6
2017-07-07	8	D	Quad	5	pop	pop	1		EB	211.2
2017-07-07	8	D	Quad	5	med	med	29		EB	6124.8
2017-07-07	8	D	Entire	All	clo	w clo	79		EB	79
2017-07-07	8	D	Entire	All	clo	r clo	94		EB	94
2017-07-07	8	D	Entire	All	yd	yd	23		EB	23
2017-07-07	8	D	Entire	All	kw	kw	0		EB	0
2017-07-07	8	D	Entire	All	ox	ox	16		EB	16
2017-07-07	8	E	Quad	1	fd	fd	0		EB	0
2017-07-07	8	E	Quad	1	cam	cam	103		EB	21753.6
2017-07-07	8	E	Quad	1	pop	pop	0		EB	0
2017-07-07	8	E	Sub-s	1	med	med	10	0.5	EB	4224
2017-07-07	8	E	Quad	2	fd	fd	0		EB	0
2017-07-07	8	E	Quad	2	cam	cam	113		EB	23865.6
2017-07-07	8	E	Quad	2	pop	pop	1		EB	211.2
2017-07-07	8	E	Quad	2	med	med	18		EB	3801.6
2017-07-07	8	E	Quad	3	fd	fd	0		EB	0
2017-07-07	8	E	Quad	3	cam	cam	55		EB	11616
2017-07-07	8	E	Quad	3	pop	pop	0		EB	0
2017-07-07	8	E	Quad	3	med	med	19		EB	4012.8
2017-07-07	8	E	Quad	4	fd	fd	0		EB	0
2017-07-07	8	E	Quad	4	cam	cam	76		EB	16051.2
2017-07-07	8	E	Quad	4	pop	pop	4		EB	844.8
2017-07-07	8	E	Quad	4	med	med	20		EB	4224
2017-07-07	8	E	Quad	5	fd	fd	0		EB	0
2017-07-07	8	E	Quad	5	cam	cam	167		EB	35270.4
2017-07-07	8	E	Quad	5	pop	pop	1		EB	211.2
2017-07-07	8	E	Quad	5	med	med	9		EB	1900.8
2017-07-07	8	E	Entire	All	clo	w clo	45		EB	45
2017-07-07	8	E	Entire	All	clo	r clo	63		EB	63
2017-07-07	8	E	Entire	All	yd	yd	5		EB	5
2017-07-07	8	E	Entire	All	kw	kw	1		EB	1
2017-07-07	8	E	Entire	All	ox	ox	15		EB	15
2017-07-07	8	F	Quad	1	fd	fd	1		EB	211.2
2017-07-07	8	F	Quad	1	cam	cam	88		EB	18585.6
2017-07-07	8	F	Quad	1	pop	pop	0		EB	0
2017-07-07	8	F	Quad	1	med	med	0		EB	0
2017-07-07	8	F	Quad	2	fd	fd	1		EB	211.2
2017-07-07	8	F	Quad	2	cam	cam	148		EB	31257.6
2017-07-07	8	F	Quad	2	pop	pop	0		EB	0
2017-07-07	8	F	Quad	2	med	med	18		EB	3801.6
2017-07-07	8	F	Quad	3	fd	fd	0		EB	0
2017-07-07	8	F	Sub-s	3	cam	cam	121	0.5	EB	51110.4
2017-07-07	8	F	Quad	3	pop	pop	1		EB	211.2
2017-07-07	8	F	Quad	3	med	med	10		EB	2112
2017-07-07	8	F	Quad	4	fd	fd	4		EB	844.8
2017-07-07	8	F	Quad	4	cam	cam	87		EB	18374.4
2017-07-07	8	F	Quad	4	pop	pop	2		EB	422.4
2017-07-07	8	F	Sub-s	4	med	med	38	0.6	EB	13376
2017-07-07	8	F	Quad	5	fd	fd	0		EB	0
2017-07-07	8	F	Sub-s	5	cam	cam	81	0.5	EB	34214.4
2017-07-07	8	F	Quad	5	pop	pop	0		EB	0
2017-07-07	8	F	Quad	5	med	med	12		EB	2534.4
2017-07-07	8	F	Entire	All	clo	w clo	91		EB	91
2017-07-07	8	F	Entire	All	clo	r clo	71		EB	71
2017-07-07	8	F	Entire	All	yd	yd	20		EB	20
2017-07-07	8	F	Entire	All	kw	kw	1		EB	1
2017-07-07	8	F	Entire	All	ox	ox	20		EB	20

## Sheet: Bailesetal_datafile3_ESM.csv
date	comp	min	bee	col_colour	behaviour	flower_type	temp	start	person
2017-06-13	D	1	15	y	n	cam	27	1904-01-01 14:30:00	EB
2017-06-13	D	1	10	y	n	cam	27	1904-01-01 14:30:00	EB
2017-06-13	D	2	6	bl	n	cam	27	1904-01-01 14:30:00	EB
2017-06-13	D	3	um		p, hd	pop	27	1904-01-01 14:30:00	EB
2017-06-13	D	4	37	or	n	leg1	27	1904-01-01 14:30:00	EB
2017-06-13	D	5	31	or	n	cam	27	1904-01-01 14:30:00	EB
2017-06-13	D	6	7	bl	hd	pop	27	1904-01-01 14:30:00	EB
2017-06-13	D	8	1	w	hd	pop	27	1904-01-01 14:30:00	EB
2017-06-13	D	9	20	w	n	cam	27	1904-01-01 14:30:00	EB
2017-06-13	D	11	29	bl	n	cam	27	1904-01-01 14:30:00	EB
2017-06-13	D	12	1	tg	hd	cam	27	1904-01-01 14:30:00	EB
2017-06-13	D	12	31	or	n	cam	27	1904-01-01 14:30:00	EB
2017-06-13	D	12	11	or	n	cam	27	1904-01-01 14:30:00	EB
2017-06-13	D	15	u?	bl	n	cam	27	1904-01-01 14:30:00	EB
2017-06-13	D	15	3	tg	n	cam	27	1904-01-01 14:30:00	EB
2017-06-13	D	16	1	w	hd	clo	27	1904-01-01 14:30:00	EB
2017-06-13	D	16	10	y	p, hd	pop	27	1904-01-01 14:30:00	EB
2017-06-13	D	17	29	bl	n	cam	27	1904-01-01 14:30:00	EB
2017-06-13	D	18	15	y	n	cam	27	1904-01-01 14:30:00	EB
2017-06-13	D	19	2	tg	n	leg1	27	1904-01-01 14:30:00	EB
2017-06-13	C	2	2	li	n	cam	28	1904-01-01 13:33:00	EB
2017-06-13	C	2	16	li	n	cam	28	1904-01-01 13:33:00	EB
2017-06-13	C	4	19	li	n	cam	28	1904-01-01 13:33:00	EB
2017-06-13	C	5	30	li	n	cam	28	1904-01-01 13:33:00	EB
2017-06-13	C	8	28	or	n	cam	28	1904-01-01 13:33:00	EB
2017-06-13	C	9	19	li	n	cam	28	1904-01-01 13:33:00	EB
2017-06-13	C	9	19	li	n	leg1	28	1904-01-01 13:33:00	EB
2017-06-13	C	9	30	li	n	cam	28	1904-01-01 13:33:00	EB
2017-06-13	C	13	19	li	p	pop	28	1904-01-01 13:33:00	EB
2017-06-13	C	14	8	or	p	cam	28	1904-01-01 13:33:00	EB
2017-06-13	C	15	8	or	n	leg1	28	1904-01-01 13:33:00	EB
2017-06-13	C	16	7	li	n	cam	28	1904-01-01 13:33:00	EB
2017-06-13	C	16	19	li	n	cam	28	1904-01-01 13:33:00	EB
2017-06-13	C	19		or	n	leg1	28	1904-01-01 13:33:00	EB
2017-06-13	C	20	19	or	n	gr1	28	1904-01-01 13:33:00	EB
2017-06-13	E	1	23	or	n	cam	27.8	1904-01-01 14:05:00	EB
2017-06-13	E	2	17	y	n	cam	27.8	1904-01-01 14:05:00	EB
2017-06-13	E	3	27	or	n	cam	27.8	1904-01-01 14:05:00	EB
2017-06-13	E	6	17	y	n	cam	27.8	1904-01-01 14:05:00	EB
2017-06-13	E	7	14	y	n	cam	27.8	1904-01-01 14:05:00	EB
2017-06-13	E	8	23	or	n	cam	27.8	1904-01-01 14:05:00	EB
2017-06-13	E	9	25	y	hd	cam	27.8	1904-01-01 14:05:00	EB
2017-06-13	E	9	23	or	n	cam	27.8	1904-01-01 14:05:00	EB
2017-06-13	E	10	14	y	n	leg1	27.8	1904-01-01 14:05:00	EB
2017-06-13	E	11	17	y	n	cam	27.8	1904-01-01 14:05:00	EB
2017-06-13	E	12	2	bl	n	fd	27.8	1904-01-01 14:05:00	EB
2017-06-13	E	14	16	y	n	cam	27.8	1904-01-01 14:05:00	EB
2017-06-13	E	14	21	or	n	cam	27.8	1904-01-01 14:05:00	EB
2017-06-13	E	15	17	y	n	cam	27.8	1904-01-01 14:05:00	EB
2017-06-13	E	15	23	or	n	cam	27.8	1904-01-01 14:05:00	EB
2017-06-13	E	16	2	bl	n	cam	27.8	1904-01-01 14:05:00	EB
2017-06-13	E	17	um		n	cam	27.8	1904-01-01 14:05:00	EB
2017-06-13	E	19	17	y	n	cam	27.8	1904-01-01 14:05:00	EB
2017-06-13	A	1	7	w	hd	cam	28.2	1904-01-01 14:21:00	JB
2017-06-13	A	1	15	ty	p	cam	28.2	1904-01-01 14:21:00	JB
2017-06-13	A	2	15	ty	p	cam	28.2	1904-01-01 14:21:00	JB
2017-06-13	A	2	17	ty	hd	cam	28.2	1904-01-01 14:21:00	JB
2017-06-13	A	3	11	or	p	pop	28.2	1904-01-01 14:21:00	JB
2017-06-13	A	4	30	w	p	pop	28.2	1904-01-01 14:21:00	JB
2017-06-13	A	5	20	ty	n	cam	28.2	1904-01-01 14:21:00	JB
2017-06-13	A	6	7	w	n	cam	28.2	1904-01-01 14:21:00	JB
2017-06-13	A	6	11	or	n	cam	28.2	1904-01-01 14:21:00	JB
2017-06-13	A	7	7	w	n	cam	28.2	1904-01-01 14:21:00	JB
2017-06-13	A	8		ty	hd	cam	28.2	1904-01-01 14:21:00	JB
2017-06-13	A	8	1	w	p	cam	28.2	1904-01-01 14:21:00	JB
2017-06-13	A	9	5	w	n	cam	28.2	1904-01-01 14:21:00	JB
2017-06-13	A	10	11	or	n	cam	28.2	1904-01-01 14:21:00	JB
2017-06-13	A	10	15	w	n	cam	28.2	1904-01-01 14:21:00	JB
2017-06-13	A	11	5	w	n	cam	28.2	1904-01-01 14:21:00	JB
2017-06-13	A	12	11	or	n	cam	28.2	1904-01-01 14:21:00	JB
2017-06-13	A	12	1	w	n	cam	28.2	1904-01-01 14:21:00	JB
2017-06-13	A	13	15	w	n	cam	28.2	1904-01-01 14:21:00	JB
2017-06-13	A	13	20	ty	n	cam	28.2	1904-01-01 14:21:00	JB
2017-06-13	A	15	7	w	n	gr1	28.2	1904-01-01 14:21:00	JB
2017-06-13	A	15	1	w	n	cam	28.2	1904-01-01 14:21:00	JB
2017-06-13	A	16	11	or	n	cam	28.2	1904-01-01 14:21:00	JB
2017-06-13	A	17	20	ty	n	cam	28.2	1904-01-01 14:21:00	JB
2017-06-13	A	17	7	w	n	cam	28.2	1904-01-01 14:21:00	JB
2017-06-13	A	18	5	w	n	cam	28.2	1904-01-01 14:21:00	JB
2017-06-13	A	19	20	ty	n	cam	28.2	1904-01-01 14:21:00	JB
2017-06-13	A	19		ty	n	cam	28.2	1904-01-01 14:21:00	JB
2017-06-13	A	20	7	w	n	cam	28.2	1904-01-01 14:21:00	JB
2017-06-13	B	1	10	y	n	cam	28.7	1904-01-01 13:43:00	JB
2017-06-13	B	3	20	y	n	cam	28.7	1904-01-01 13:43:00	JB
2017-06-13	B	3	4	li	n	cam	28.7	1904-01-01 13:43:00	JB
2017-06-13	B	3	20	y	p	cam	28.7	1904-01-01 13:43:00	JB
2017-06-13	B	5	12	li	n	leg1	28.7	1904-01-01 13:43:00	JB
2017-06-13	B	6		y	n	cam	28.7	1904-01-01 13:43:00	JB
2017-06-13	B	7	9	li	hd	cam	28.7	1904-01-01 13:43:00	JB
2017-06-13	B	8	20	li	hd	cam	28.7	1904-01-01 13:43:00	JB
2017-06-13	B	9	36	y	n	cam	28.7	1904-01-01 13:43:00	JB
2017-06-13	B	9	4	li	n	cam	28.7	1904-01-01 13:43:00	JB
2017-06-13	B	10	20	y	p	pop	28.7	1904-01-01 13:43:00	JB
2017-06-13	B	10	34	li	hd	pop	28.7	1904-01-01 13:43:00	JB
2017-06-13	B	11	9	li	n	cam	28.7	1904-01-01 13:43:00	JB
2017-06-13	B	12	4	li	n	cam	28.7	1904-01-01 13:43:00	JB
2017-06-13	B	12	16	y	hd	cam	28.7	1904-01-01 13:43:00	JB
2017-06-13	B	13		tbl	hd	pop	28.7	1904-01-01 13:43:00	JB
2017-06-13	B	14		tbl	hd	cam	28.7	1904-01-01 13:43:00	JB
2017-06-13	B	15	36	y	n	gr1	28.7	1904-01-01 13:43:00	JB
2017-06-13	B	15	10	y	n	cam	28.7	1904-01-01 13:43:00	JB
2017-06-13	B	16	um		hd	cam	28.7	1904-01-01 13:43:00	JB
2017-06-13	B	16	14	bl	hd	cam	28.7	1904-01-01 13:43:00	JB
2017-06-13	B	17		or	n	gr1	28.7	1904-01-01 13:43:00	JB
2017-06-13	B	18	22	y	hd	pop	28.7	1904-01-01 13:43:00	JB
2017-06-13	B	19	10	y	n	cam	28.7	1904-01-01 13:43:00	JB
2017-06-13	B	19	10	y	n	cam	28.7	1904-01-01 13:43:00	JB
2017-06-13	B	20	22	y	n	gr1	28.7	1904-01-01 13:43:00	JB
2017-06-13	F	1	14	bl	n	ox		1904-01-01 14:49:00	JB
2017-06-13	F	1	2	bl	n	cam		1904-01-01 14:49:00	JB
2017-06-13	F	2	27	bl	n	leg1		1904-01-01 14:49:00	JB
2017-06-13	F	2	24		n	gr1		1904-01-01 14:49:00	JB
2017-06-13	F	3	14	bl	n	cam		1904-01-01 14:49:00	JB
2017-06-13	F	3	12	li	n	cam		1904-01-01 14:49:00	JB
2017-06-13	F	3	15	bl	n	cam		1904-01-01 14:49:00	JB
2017-06-13	F	4	1	li	hd	clo		1904-01-01 14:49:00	JB
2017-06-13	F	5	2	bl	n	cam		1904-01-01 14:49:00	JB
2017-06-13	F	5	30	bl	n	cam		1904-01-01 14:49:00	JB
2017-06-13	F	6	14	bl	n	ox		1904-01-01 14:49:00	JB
2017-06-13	F	6	27	bl	n	cam		1904-01-01 14:49:00	JB
2017-06-13	F	6	15	bl	n	cam		1904-01-01 14:49:00	JB
2017-06-13	F	7	15	bl	n	cam		1904-01-01 14:49:00	JB
2017-06-13	F	7	um		n	leg1		1904-01-01 14:49:00	JB
2017-06-13	F	8	15	or	n	cam		1904-01-01 14:49:00	JB
2017-06-13	F	9	3	w	n	cam		1904-01-01 14:49:00	JB
2017-06-13	F	9	2	li	n	cam		1904-01-01 14:49:00	JB
2017-06-13	F	9	14	w	n	ox		1904-01-01 14:49:00	JB
2017-06-13	F	10	2	li	n	cam		1904-01-01 14:49:00	JB
2017-06-13	F	10	7	bl	n	cam		1904-01-01 14:49:00	JB
2017-06-13	F	10	34	w	p	cam		1904-01-01 14:49:00	JB
2017-06-13	F	11	2	y	n	clo		1904-01-01 14:49:00	JB
2017-06-13	F	11	6	bl	n	cam		1904-01-01 14:49:00	JB
2017-06-13	F	12	36	w	n	cam		1904-01-01 14:49:00	JB
2017-06-13	F	13	9	li	n	cam		1904-01-01 14:49:00	JB
2017-06-13	F	13	24	y	p	pop		1904-01-01 14:49:00	JB
2017-06-13	F	13	um		hd	clo		1904-01-01 14:49:00	JB
2017-06-13	F	14	um		n	cam		1904-01-01 14:49:00	JB
2017-06-13	F	15	30	bl	p	cam		1904-01-01 14:49:00	JB
2017-06-13	F	15	12	li	n	cam		1904-01-01 14:49:00	JB
2017-06-13	F	15	27	bl	n	cam		1904-01-01 14:49:00	JB
2017-06-13	F	16	9	li	n	cam		1904-01-01 14:49:00	JB
2017-06-13	F	16	2	bl	n	cam		1904-01-01 14:49:00	JB
2017-06-13	F	17	15	or	n	cam		1904-01-01 14:49:00	JB
2017-06-13	F	17	6	bl	n	cam		1904-01-01 14:49:00	JB
2017-06-13	F	18	20	li	n	cam		1904-01-01 14:49:00	JB
2017-06-13	F	18	9	li	n	cam		1904-01-01 14:49:00	JB
2017-06-13	F	18	21	bl	n	cam		1904-01-01 14:49:00	JB
2017-06-13	F	18	15	or	n	cam		1904-01-01 14:49:00	JB
2017-06-13	F	19	18	w	n	cam		1904-01-01 14:49:00	JB
2017-06-13	F	19	14	w	n	cam		1904-01-01 14:49:00	JB
2017-06-13	F	20	9	li	n	cam		1904-01-01 14:49:00	JB
2017-06-13	F	20	2	bl	n	cam		1904-01-01 14:49:00	JB
2017-06-17	F	0	4	li	n	fd	31	1904-01-01 15:04:00	EB
2017-06-17	F	1	15	or	n	cam	31	1904-01-01 15:04:00	EB
2017-06-17	F	2	15	or	n	cam	31	1904-01-01 15:04:00	EB
2017-06-17	F	3	UM	male	n	leg1	31	1904-01-01 15:04:00	EB
2017-06-17	F	5	4	li	n	cam	31	1904-01-01 15:04:00	EB
2017-06-17	F	6	17	bl	p	pop	31	1904-01-01 15:04:00	EB
2017-06-17	F	8	17	bl	n	ox	31	1904-01-01 15:04:00	EB
2017-06-17	F	12	4	li	n	fd	31	1904-01-01 15:04:00	EB
2017-06-17	F	13	15	or	n	cam	31	1904-01-01 15:04:00	EB
2017-06-17	F	15	4	li	n	cam	31	1904-01-01 15:04:00	EB
2017-06-17	F	15		li	n	pop	31	1904-01-01 15:04:00	EB
2017-06-17	F	17	15	or	n	cam	31	1904-01-01 15:04:00	EB
2017-06-17	F	18	11	or	n	cam	31	1904-01-01 15:04:00	EB
2017-06-17	F	19		li	p	pop	31	1904-01-01 15:04:00	EB
2017-06-17	D	1	2	or	hd	pop	38	1904-01-01 14:29:00	EB
2017-06-17	D	1	21	tg	n	leg1	38	1904-01-01 14:29:00	EB
2017-06-17	D	2	21	tg	n	leg1	38	1904-01-01 14:29:00	EB
2017-06-17	D	3	3	tg	n	cam	38	1904-01-01 14:29:00	EB
2017-06-17	D	3	3	tg	n	pop	38	1904-01-01 14:29:00	EB
2017-06-17	D	5	3	tg	n	leg1	38	1904-01-01 14:29:00	EB
2017-06-17	D	5	10	y	n	cam	38	1904-01-01 14:29:00	EB
2017-06-17	D	7		or	n	leg1	38	1904-01-01 14:29:00	EB
2017-06-17	D	7	10	or	n	cam	38	1904-01-01 14:29:00	EB
2017-06-17	D	8	21	tg	n	clo	38	1904-01-01 14:29:00	EB
2017-06-17	D	8		li	n	cam	38	1904-01-01 14:29:00	EB
2017-06-17	D	10	24	li	n	fd	38	1904-01-01 14:29:00	EB
2017-06-17	D	10	21	tg	n	pop	38	1904-01-01 14:29:00	EB
2017-06-17	D	12	3	tg	n	leg1	38	1904-01-01 14:29:00	EB
2017-06-17	D	14	11	or	n	pop	38	1904-01-01 14:29:00	EB
2017-06-17	D	15	10	y	n	ox	38	1904-01-01 14:29:00	EB
2017-06-17	D	16	40	tg	n	cam	38	1904-01-01 14:29:00	EB
2017-06-17	D	18	27	w	n	pop	38	1904-01-01 14:29:00	EB
2017-06-17	D	19	10	or	n	cam	38	1904-01-01 14:29:00	EB
2017-06-17	E	1	23	or	n	cam	31	1904-01-01 02:03:00	EB
2017-06-17	E	3	12	y	n	cam	31	1904-01-01 02:03:00	EB
2017-06-17	E	4	24	or	n	cam	31	1904-01-01 02:03:00	EB
2017-06-17	E	4	12	y	n	fd	31	1904-01-01 02:03:00	EB
2017-06-17	E	7	23	or	n	cam	31	1904-01-01 02:03:00	EB
2017-06-17	E	8	22	bl	n	cam	31	1904-01-01 02:03:00	EB
2017-06-17	E	8	22	or	n	ox	31	1904-01-01 02:03:00	EB
2017-06-17	E	9	12	y	n	cam	31	1904-01-01 02:03:00	EB
2017-06-17	E	12	23	or	n	ox	31	1904-01-01 02:03:00	EB
2017-06-17	E	12	12	y	n	gr1	31	1904-01-01 02:03:00	EB
2017-06-17	E	13	12	y	n	ox	31	1904-01-01 02:03:00	EB
2017-06-17	E	15	22	or	n	cam	31	1904-01-01 02:03:00	EB
2017-06-17	E	16	17	y	n	cam	31	1904-01-01 02:03:00	EB
2017-06-17	E	18		y	n	cam	31	1904-01-01 02:03:00	EB
2017-06-17	E	18	12	y	n	cam	31	1904-01-01 02:03:00	EB
2017-06-17	E	18	17	y	n	cam	31	1904-01-01 02:03:00	EB
2017-06-17	C	1	34	li	n	cam	32.1	1904-01-01 15:00:00	JB
2017-06-17	C	2		or	n	leg1	32.1	1904-01-01 15:00:00	JB
2017-06-17	C	2	19	or	n	leg1	32.1	1904-01-01 15:00:00	JB
2017-06-17	C	3	20	bl	n	cam	32.1	1904-01-01 15:00:00	JB
2017-06-17	C	3	34	li	n	cam	32.1	1904-01-01 15:00:00	JB
2017-06-17	C	4	22	li	n	cam	32.1	1904-01-01 15:00:00	JB
2017-06-17	C	6	22	li	p	pop	32.1	1904-01-01 15:00:00	JB
2017-06-17	C	6	34	li	n	cam	32.1	1904-01-01 15:00:00	JB
2017-06-17	C	7	14	or	n	fd	32.1	1904-01-01 15:00:00	JB
2017-06-17	C	8	8	or	n	cam	32.1	1904-01-01 15:00:00	JB
2017-06-17	C	9	34	li	n	clo	32.1	1904-01-01 15:00:00	JB
2017-06-17	C	10		bl	n	cam	32.1	1904-01-01 15:00:00	JB
2017-06-17	C	10	8	or	n	cam	32.1	1904-01-01 15:00:00	JB
2017-06-17	C	11		or	hd	pop	32.1	1904-01-01 15:00:00	JB
2017-06-17	C	12	34	li	n	cam	32.1	1904-01-01 15:00:00	JB
2017-06-17	C	14	9	or	n	cam	32.1	1904-01-01 15:00:00	JB
2017-06-17	C	15	9	or	n	cam	32.1	1904-01-01 15:00:00	JB
2017-06-17	C	16	27	or	n	leg1	32.1	1904-01-01 15:00:00	JB
2017-06-17	C	16	2	bl	hd	cam	32.1	1904-01-01 15:00:00	JB
2017-06-17	C	17	8	or	n	cam	32.1	1904-01-01 15:00:00	JB
2017-06-17	C	17	25	li	n	cam	32.1	1904-01-01 15:00:00	JB
2017-06-17	C	18	20	bl	n	cam	32.1	1904-01-01 15:00:00	JB
2017-06-17	C	18	7	or	n	cam	32.1	1904-01-01 15:00:00	JB
2017-06-17	C	19	6	or	n	cam	32.1	1904-01-01 15:00:00	JB
2017-06-17	C	20	8	or	n	fd	32.1	1904-01-01 15:00:00	JB
2017-06-17	B	1	27	bl	n	cam	39.3	1904-01-01 14:03:00	JB
2017-06-17	B	1	29	y	n	fd	39.3	1904-01-01 14:03:00	JB
2017-06-17	B	2	17	y	hd	pop	39.3	1904-01-01 14:03:00	JB
2017-06-17	B	3	22	bl	n	fd	39.3	1904-01-01 14:03:00	JB
2017-06-17	B	4	26	tbl	n	leg1	39.3	1904-01-01 14:03:00	JB
2017-06-17	B	6	um male		n	fd	39.3	1904-01-01 14:03:00	JB
2017-06-17	B	6	29	y	p	pop	39.3	1904-01-01 14:03:00	JB
2017-06-17	B	9		bl	n	cam	39.3	1904-01-01 14:03:00	JB
2017-06-17	B	9	29	y	n	fd	39.3	1904-01-01 14:03:00	JB
2017-06-17	B	11	22	bl	n	fd	39.3	1904-01-01 14:03:00	JB
2017-06-17	B	12	11	bl	n	cam	39.3	1904-01-01 14:03:00	JB
2017-06-17	B	15	31	bl	hd	fd	39.3	1904-01-01 14:03:00	JB
2017-06-17	B	16	29	y	n	cam	39.3	1904-01-01 14:03:00	JB
2017-06-17	B	17	11	bl	n	fd	39.3	1904-01-01 14:03:00	JB
2017-06-17	B	18	2	tbl	p	pop	39.3	1904-01-01 14:03:00	JB
2017-06-17	B	19	17	y	p	pop	39.3	1904-01-01 14:03:00	JB
2017-06-17	B	19	4	y	p	pop	39.3	1904-01-01 14:03:00	JB
2017-06-17	A	1	18	ty	hd	pop	38.7	1904-01-01 14:30:00	JB
2017-06-17	A	2	8	ty	n	fd	38.7	1904-01-01 14:30:00	JB
2017-06-17	A	2		ty	n	fd	38.7	1904-01-01 14:30:00	JB
2017-06-17	A	3	20	w	n	fd	38.7	1904-01-01 14:30:00	JB
2017-06-17	A	4		ty	n	cam	38.7	1904-01-01 14:30:00	JB
2017-06-17	A	5		ty	n	cam	38.7	1904-01-01 14:30:00	JB
2017-06-17	A	5	40	ty	n	gr1	38.7	1904-01-01 14:30:00	JB
2017-06-17	A	5	20	w	n	fd	38.7	1904-01-01 14:30:00	JB
2017-06-17	A	6		or	n	ox	38.7	1904-01-01 14:30:00	JB
2017-06-17	A	7	20	w	n	fd	38.7	1904-01-01 14:30:00	JB
2017-06-17	A	7		ty	n	cam	38.7	1904-01-01 14:30:00	JB
2017-06-17	A	8	40	ty	n	cam	38.7	1904-01-01 14:30:00	JB
2017-06-17	A	8	15	w	n	cam	38.7	1904-01-01 14:30:00	JB
2017-06-17	A	9		ty	n	cam	38.7	1904-01-01 14:30:00	JB
2017-06-17	A	10	20	w	n	fd	38.7	1904-01-01 14:30:00	JB
2017-06-17	A	11	18	ty	n	cam	38.7	1904-01-01 14:30:00	JB
2017-06-17	A	11	1	ty	hd	clo	38.7	1904-01-01 14:30:00	JB
2017-06-17	A	12		or	n	fd	38.7	1904-01-01 14:30:00	JB
2017-06-17	A	13		ty	n	cam	38.7	1904-01-01 14:30:00	JB
2017-06-17	A	13	17	or	hd	clo	38.7	1904-01-01 14:30:00	JB
2017-06-17	A	14	20	w	hd	fd	38.7	1904-01-01 14:30:00	JB
2017-06-17	A	15	20	ty	n	cam	38.7	1904-01-01 14:30:00	JB
2017-06-17	A	16	17	or	n	clo	38.7	1904-01-01 14:30:00	JB
2017-06-17	A	16	29	w	n	cam	38.7	1904-01-01 14:30:00	JB
2017-06-17	A	17	6	ty	n	cam	38.7	1904-01-01 14:30:00	JB
2017-06-17	A	18	20	w	n	cam	38.7	1904-01-01 14:30:00	JB
2017-06-17	A	19	11	or	n	cam	38.7	1904-01-01 14:30:00	JB
2017-06-17	A	19	11	w	n	cam	38.7	1904-01-01 14:30:00	JB
2017-06-17	A	20	20	ty	n	cam	38.7	1904-01-01 14:30:00	JB
2017-06-22	C	1	44	li	n	cam	25.2	1904-01-01 16:55:00	JB
2017-06-22	C	2	40	or	p	pop	25.2	1904-01-01 16:55:00	JB
2017-06-22	C	4	44	li	n	cam	25.2	1904-01-01 16:55:00	JB
2017-06-22	C	4	14	or	n	cam	25.2	1904-01-01 16:55:00	JB
2017-06-22	C	6	40	or	p	pop	25.2	1904-01-01 16:55:00	JB
2017-06-22	C	7	33	bl	n	cam	25.2	1904-01-01 16:55:00	JB
2017-06-22	C	8	31	li	n	cam	25.2	1904-01-01 16:55:00	JB
2017-06-22	C	8	44	li	n	cam	25.2	1904-01-01 16:55:00	JB
2017-06-22	C	10	14	or	p	pop	25.2	1904-01-01 16:55:00	JB
2017-06-22	C	11	22	li	p	pop	25.2	1904-01-01 16:55:00	JB
2017-06-22	C	11	31	li	n	fd	25.2	1904-01-01 16:55:00	JB
2017-06-22	C	13	14	or	n	cam	25.2	1904-01-01 16:55:00	JB
2017-06-22	C	14	14	li	n	cam	25.2	1904-01-01 16:55:00	JB
2017-06-22	C	14	19	li	p	pop	25.2	1904-01-01 16:55:00	JB
2017-06-22	C	15	35	li	n	fd	25.2	1904-01-01 16:55:00	JB
2017-06-22	C	15	22	li	p	pop	25.2	1904-01-01 16:55:00	JB
2017-06-22	C	16	16	bl	hd	cam	25.2	1904-01-01 16:55:00	JB
2017-06-22	C	17	19	li	p	pop	25.2	1904-01-01 16:55:00	JB
2017-06-22	C	18	34	li	n	cam	25.2	1904-01-01 16:55:00	JB
2017-06-22	C	19	22	li	p	pop	25.2	1904-01-01 16:55:00	JB
2017-06-22	D	2		or	n	cam	31.6	1904-01-01 15:55:00	JB
2017-06-22	D	2		bl	n	cam	31.6	1904-01-01 15:55:00	JB
2017-06-22	D	2	5	w	n	cam	31.6	1904-01-01 15:55:00	JB
2017-06-22	D	3	unm		n	cam	31.6	1904-01-01 15:55:00	JB
2017-06-22	D	3	10	or	p	pop	31.6	1904-01-01 15:55:00	JB
2017-06-22	D	3	1	w	p	pop	31.6	1904-01-01 15:55:00	JB
2017-06-22	D	4	1	w	n	leg1	31.6	1904-01-01 15:55:00	JB
2017-06-22	D	5	55	or	n	cam	31.6	1904-01-01 15:55:00	JB
2017-06-22	D	6		bl	p	pop	31.6	1904-01-01 15:55:00	JB
2017-06-22	D	7	unm		n	cam	31.6	1904-01-01 15:55:00	JB
2017-06-22	D	8	1	w	p	pop	31.6	1904-01-01 15:55:00	JB
2017-06-22	D	9		bl	p	pop	31.6	1904-01-01 15:55:00	JB
2017-06-22	D	9	10	or	p	pop	31.6	1904-01-01 15:55:00	JB
2017-06-22	D	10	17	li	hd	cam	31.6	1904-01-01 15:55:00	JB
2017-06-22	D	11	27	w	hd	clo	31.6	1904-01-01 15:55:00	JB
2017-06-22	D	12	55	or	n	cam	31.6	1904-01-01 15:55:00	JB
2017-06-22	D	13	10	or	p	pop	31.6	1904-01-01 15:55:00	JB
2017-06-22	D	13	44	tg	n	leg1	31.6	1904-01-01 15:55:00	JB
2017-06-22	D	13	5	w	n	cam	31.6	1904-01-01 15:55:00	JB
2017-06-22	D	15	10	or	n	cam	31.6	1904-01-01 15:55:00	JB
2017-06-22	D	16	17	li	hd	clo	31.6	1904-01-01 15:55:00	JB
2017-06-22	D	16	1	w	p	pop	31.6	1904-01-01 15:55:00	JB
2017-06-22	D	17	4	bl	n	cam	31.6	1904-01-01 15:55:00	JB
2017-06-22	D	17	unm		n	cam	31.6	1904-01-01 15:55:00	JB
2017-06-22	D	20	44	tg	n	cam	31.6	1904-01-01 15:55:00	JB
2017-06-22	E	1	23	or	n	ox	26.9	1904-01-01 16:20:00	JB
2017-06-22	E	1		bl	n	cam	26.9	1904-01-01 16:20:00	JB
2017-06-22	E	2	18	y	n	cam	26.9	1904-01-01 16:20:00	JB
2017-06-22	E	3	44	or	hd	pop	26.9	1904-01-01 16:20:00	JB
2017-06-22	E	5	38	y	n	leg1	26.9	1904-01-01 16:20:00	JB
2017-06-22	E	7	50	bl	n	leg1	26.9	1904-01-01 16:20:00	JB
2017-06-22	E	7	14	y	n	cam	26.9	1904-01-01 16:20:00	JB
2017-06-22	E	8	23	or	hd	pop	26.9	1904-01-01 16:20:00	JB
2017-06-22	E	9	32	y	hd	clo	26.9	1904-01-01 16:20:00	JB
2017-06-22	E	11	13	bl	hd	clo	26.9	1904-01-01 16:20:00	JB
2017-06-22	E	11	50	bl	n	leg1	26.9	1904-01-01 16:20:00	JB
2017-06-22	E	12	14	y	n	ox	26.9	1904-01-01 16:20:00	JB
2017-06-22	E	14	44	or	hd	clo	26.9	1904-01-01 16:20:00	JB
2017-06-22	E	15	26	bl	n	cam	26.9	1904-01-01 16:20:00	JB
2017-06-22	E	16	44	or	n	leg1	26.9	1904-01-01 16:20:00	JB
2017-06-22	E	16	14	y	n	cam	26.9	1904-01-01 16:20:00	JB
2017-06-22	E	16	32	bl	n	cam	26.9	1904-01-01 16:20:00	JB
2017-06-22	E	18	26	bl	n	cam	26.9	1904-01-01 16:20:00	JB
2017-06-22	E	19	44	or	n	leg1	26.9	1904-01-01 16:20:00	JB
2017-06-22	E	20	32	bl	n	cam	26.9	1904-01-01 16:20:00	JB
2017-06-22	F	1	3		n	leg1	25.7	1904-01-01 16:47:00	EB
2017-06-22	F	2	24	li	p	pop	25.7	1904-01-01 16:47:00	EB
2017-06-22	F	2	12	li	n	cam	25.7	1904-01-01 16:47:00	EB
2017-06-22	F	5	15	or	n	fd	25.7	1904-01-01 16:47:00	EB
2017-06-22	F	7	9	li	n	cam	25.7	1904-01-01 16:47:00	EB
2017-06-22	F	8	um		n	cam	25.7	1904-01-01 16:47:00	EB
2017-06-22	F	9	15	or	n	cam	25.7	1904-01-01 16:47:00	EB
2017-06-22	F	11	9	li	n	cam	25.7	1904-01-01 16:47:00	EB
2017-06-22	F	12	9	li	n	cam	25.7	1904-01-01 16:47:00	EB
2017-06-22	F	14	15	or	n	fd	25.7	1904-01-01 16:47:00	EB
2017-06-22	F	15		li	n	yedai	25.7	1904-01-01 16:47:00	EB
2017-06-22	F	16	24	li	n	leg1	25.7	1904-01-01 16:47:00	EB
2017-06-22	F	18	20	li	p	pop	25.7	1904-01-01 16:47:00	EB
2017-06-22	F	19	24	li	p	pop	25.7	1904-01-01 16:47:00	EB
2017-06-22	F	19	15	or	n	ox	25.7	1904-01-01 16:47:00	EB
2017-06-22	F	20	6	ty	rest	ox	25.7	1904-01-01 16:47:00	EB
2017-06-22	A	1	8	ty	n	cam	27.6	1904-01-01 16:18:00	EB
2017-06-22	A	1	17	or	p	pop	27.6	1904-01-01 16:18:00	EB
2017-06-22	A	3	20	w	n	fd	27.6	1904-01-01 16:18:00	EB
2017-06-22	A	7	9	ty	p	fd	27.6	1904-01-01 16:18:00	EB
2017-06-22	A	8	17	or	n	fd	27.6	1904-01-01 16:18:00	EB
2017-06-22	A	8	20	w	n	leg1	27.6	1904-01-01 16:18:00	EB
2017-06-22	A	10	8	ty	n	cam	27.6	1904-01-01 16:18:00	EB
2017-06-22	A	11	17	or	p	pop	27.6	1904-01-01 16:18:00	EB
2017-06-22	A	14	25	or	p	pop	27.6	1904-01-01 16:18:00	EB
2017-06-22	A	17	25	or	n	fd	27.6	1904-01-01 16:18:00	EB
2017-06-22	A	19	20	w	rest	clo	27.6	1904-01-01 16:18:00	EB
2017-06-22	B	1	24	or	n	cam	29.8	15:54	EB
2017-06-22	B	2		w	p	pop	29.8	15:54	EB
2017-06-22	B	3	39	y	n	cam	29.8	15:54	EB
2017-06-22	B	7	29	or	n	cam	29.8	15:54	EB
2017-06-22	B	8	8	li	p	pop	29.8	15:54	EB
2017-06-22	B	9	um		n	cam	29.8	15:54	EB
2017-06-22	B	11	23	w	n	cam	29.8	15:54	EB
2017-06-22	B	11	38	y	n	cam	29.8	15:54	EB
2017-06-22	B	13	14	w	hd	pop	29.8	15:54	EB
2017-06-22	B	14	29	or	p	cam	29.8	15:54	EB
2017-06-22	B	15	39	y	n	ox	29.8	15:54	EB
2017-06-22	B	16	24	or	n	cam	29.8	15:54	EB
2017-06-22	B	17	17	ty	p	pop	29.8	15:54	EB
2017-06-22	B	18	17	ty	p	pop	29.8	15:54	EB
2017-06-22	B	19		or	n	cam	29.8	15:54	EB
2017-06-25	D	1	55	or	n	cam	28.4	1904-01-01 14:10:00	JB
2017-06-25	D	1	21	tg	n	clo	28.4	1904-01-01 14:10:00	JB
2017-06-25	D	1		tg	n	clo	28.4	1904-01-01 14:10:00	JB
2017-06-25	D	2	4	w	n	cam	28.4	1904-01-01 14:10:00	JB
2017-06-25	D	2		w	n	leg1	28.4	1904-01-01 14:10:00	JB
2017-06-25	D	2	22	w	n	cam	28.4	1904-01-01 14:10:00	JB
2017-06-25	D	2	4	w	n	cam	28.4	1904-01-01 14:10:00	JB
2017-06-25	D	4	44	or	n	cam	28.4	1904-01-01 14:10:00	JB
2017-06-25	D	5	49	tg	n	cam	28.4	1904-01-01 14:10:00	JB
2017-06-25	D	5	4	w	n	cam	28.4	1904-01-01 14:10:00	JB
2017-06-25	D	6	52	tg	n	cam	28.4	1904-01-01 14:10:00	JB
2017-06-25	D	7	61	tg	n	cam	28.4	1904-01-01 14:10:00	JB
2017-06-25	D	8	4	w	n	leg1	28.4	1904-01-01 14:10:00	JB
2017-06-25	D	8	44	or	n	cam	28.4	1904-01-01 14:10:00	JB
2017-06-25	D	8	56	or	n	cam	28.4	1904-01-01 14:10:00	JB
2017-06-25	D	9	49	tg	n	cam	28.4	1904-01-01 14:10:00	JB
2017-06-25	D	9	11	y	n	leg1	28.4	1904-01-01 14:10:00	JB
2017-06-25	D	10	22	or	hd	clo	28.4	1904-01-01 14:10:00	JB
2017-06-25	D	10	22	w	n	cam	28.4	1904-01-01 14:10:00	JB
2017-06-25	D	12	44	or	n	fd	28.4	1904-01-01 14:10:00	JB
2017-06-25	D	13	45	or	n	cam	28.4	1904-01-01 14:10:00	JB
2017-06-25	D	14	51	tg	n	cam	28.4	1904-01-01 14:10:00	JB
2017-06-25	D	14	49	tg	n	clo	28.4	1904-01-01 14:10:00	JB
2017-06-25	D	15	61	tg	n	leg1	28.4	1904-01-01 14:10:00	JB
2017-06-25	D	15	7	w	n	leg1	28.4	1904-01-01 14:10:00	JB
2017-06-25	D	16	22	or	n	leg1	28.4	1904-01-01 14:10:00	JB
2017-06-25	D	17	52	tg	p	pop	28.4	1904-01-01 14:10:00	JB
2017-06-25	D	17	50	tg	n	cam	28.4	1904-01-01 14:10:00	JB
2017-06-25	D	17	22	w	n	cam	28.4	1904-01-01 14:10:00	JB
2017-06-25	D	18	44	or	n	ox	28.4	1904-01-01 14:10:00	JB
2017-06-25	D	19	55	or	n	ox	28.4	1904-01-01 14:10:00	JB
2017-06-25	D	19	4	w	n	leg1	28.4	1904-01-01 14:10:00	JB
2017-06-25	D	20	56	or	n	leg1	28.4	1904-01-01 14:10:00	JB
2017-06-25	E	1	47	y	n	cam	33.5	1904-01-01 14:35:00	JB
2017-06-25	E	1	35	bl	n	cam	33.5	1904-01-01 14:35:00	JB
2017-06-25	E	2	9	bl	n	cam	33.5	1904-01-01 14:35:00	JB
2017-06-25	E	3		bl	n	cam	33.5	1904-01-01 14:35:00	JB
2017-06-25	E	3	21	or	n	fd	33.5	1904-01-01 14:35:00	JB
2017-06-25	E	4	27	or	n	cam	33.5	1904-01-01 14:35:00	JB
2017-06-25	E	4	32	bl	n	cam	33.5	1904-01-01 14:35:00	JB
2017-06-25	E	5	3	bl	n	cam	33.5	1904-01-01 14:35:00	JB
2017-06-25	E	5	20	bl	n	cam	33.5	1904-01-01 14:35:00	JB
2017-06-25	E	6	46	y	n	cam	33.5	1904-01-01 14:35:00	JB
2017-06-25	E	7	50	y	n	cam	33.5	1904-01-01 14:35:00	JB
2017-06-25	E	7	9	bl	n	cam	33.5	1904-01-01 14:35:00	JB
2017-06-25	E	8	3	bl	n	cam	33.5	1904-01-01 14:35:00	JB
2017-06-25	E	9		y	n	cam	33.5	1904-01-01 14:35:00	JB
2017-06-25	E	9	35	y	n	cam	33.5	1904-01-01 14:35:00	JB
2017-06-25	E	10	9	bl	n	cam	33.5	1904-01-01 14:35:00	JB
2017-06-25	E	10	51	y	n	cam	33.5	1904-01-01 14:35:00	JB
2017-06-25	E	12	20	bl	n	cam	33.5	1904-01-01 14:35:00	JB
2017-06-25	E	13	51	y	n	leg1	33.5	1904-01-01 14:35:00	JB
2017-06-25	E	13	50	y	n	cam	33.5	1904-01-01 14:35:00	JB
2017-06-25	E	14	33	bl	n	cam	33.5	1904-01-01 14:35:00	JB
2017-06-25	E	15	35	y	n	cam	33.5	1904-01-01 14:35:00	JB
2017-06-25	E	15	56	y	n	cam	33.5	1904-01-01 14:35:00	JB
2017-06-25	E	16	51	y	n	cam	33.5	1904-01-01 14:35:00	JB
2017-06-25	E	16	23	or	n	cam	33.5	1904-01-01 14:35:00	JB
2017-06-25	E	16	26	bl	n	cam	33.5	1904-01-01 14:35:00	JB
2017-06-25	E	16	23	or	p	pop	33.5	1904-01-01 14:35:00	JB
2017-06-25	E	18	33	bl	n	cam	33.5	1904-01-01 14:35:00	JB
2017-06-25	E	18	37	bl	n	cam	33.5	1904-01-01 14:35:00	JB
2017-06-25	E	18		y	n	cam	33.5	1904-01-01 14:35:00	JB
2017-06-25	E	18	46	y	n	cam	33.5	1904-01-01 14:35:00	JB
2017-06-25	E	19	61	bl	n	leg1	33.5	1904-01-01 14:35:00	JB
2017-06-25	E	19	23	or	n	cam	33.5	1904-01-01 14:35:00	JB
2017-06-25	E	20	51	y	n	cam	33.5	1904-01-01 14:35:00	JB
2017-06-25	F	1	15	or	n	clo	30.1	1904-01-01 15:03:00	JB
2017-06-25	F	1	40	w	n	cam	30.1	1904-01-01 15:03:00	JB
2017-06-25	F	2	20	li	p	pop	30.1	1904-01-01 15:03:00	JB
2017-06-25	F	2	21	or	n	cam	30.1	1904-01-01 15:03:00	JB
2017-06-25	F	2	1	ty	n	cam	30.1	1904-01-01 15:03:00	JB
2017-06-25	F	2	12	li	n	cam	30.1	1904-01-01 15:03:00	JB
2017-06-25	F	3	1	li	n	cam	30.1	1904-01-01 15:03:00	JB
2017-06-25	F	4	15	or	n	fd	30.1	1904-01-01 15:03:00	JB
2017-06-25	F	4	40	w	n	cam	30.1	1904-01-01 15:03:00	JB
2017-06-25	F	5		li	n	leg1	30.1	1904-01-01 15:03:00	JB
2017-06-25	F	5	40	w	n	cam	30.1	1904-01-01 15:03:00	JB
2017-06-25	F	6		li	n	cam	30.1	1904-01-01 15:03:00	JB
2017-06-25	F	7	15	or	n	clo	30.1	1904-01-01 15:03:00	JB
2017-06-25	F	8	20	li	n	cam	30.1	1904-01-01 15:03:00	JB
2017-06-25	F	9		li	n	ox	30.1	1904-01-01 15:03:00	JB
2017-06-25	F	10	15	or	n	cam	30.1	1904-01-01 15:03:00	JB
2017-06-25	F	11	34	w	n	cam	30.1	1904-01-01 15:03:00	JB
2017-06-25	F	11	1	ty	n	cam	30.1	1904-01-01 15:03:00	JB
2017-06-25	F	11	12	li	n	cam	30.1	1904-01-01 15:03:00	JB
2017-06-25	F	12	23	y	n	gr1	30.1	1904-01-01 15:03:00	JB
2017-06-25	F	13	15	or	n	ox	30.1	1904-01-01 15:03:00	JB
2017-06-25	F	13	34	w	p	pop	30.1	1904-01-01 15:03:00	JB
2017-06-25	F	14	47	w	n	cam	30.1	1904-01-01 15:03:00	JB
2017-06-25	F	14	19	bl	n	cam	30.1	1904-01-01 15:03:00	JB
2017-06-25	F	15	20	li	n	leg1	30.1	1904-01-01 15:03:00	JB
2017-06-25	F	15	23	y	n	cam	30.1	1904-01-01 15:03:00	JB
2017-06-25	F	16	20	li	p	pop	30.1	1904-01-01 15:03:00	JB
2017-06-25	F	16	12	li	n	cam	30.1	1904-01-01 15:03:00	JB
2017-06-25	F	17		li	n	cam	30.1	1904-01-01 15:03:00	JB
2017-06-25	F	17	17	bl	n	clo	30.1	1904-01-01 15:03:00	JB
2017-06-25	F	18	47	w	n	cam	30.1	1904-01-01 15:03:00	JB
2017-06-25	F	18	15	or	n	cam	30.1	1904-01-01 15:03:00	JB
2017-06-25	F	18	34	w	p	pop	30.1	1904-01-01 15:03:00	JB
2017-06-25	F	19	12	li	n	ox	30.1	1904-01-01 15:03:00	JB
2017-06-25	F	20	40	w	n	cam	30.1	1904-01-01 15:03:00	JB
2017-06-25	A	1	17	or	n	cam	27.6	14:06	EB
2017-06-25	A	1	28	or	n	cam	27.6	14:06	EB
2017-06-25	A	1	8	ty	n	cam	27.6	14:06	EB
2017-06-25	A	1		ty	n	cam	27.6	14:06	EB
2017-06-25	A	2	20	ty	n	cam	27.6	14:06	EB
2017-06-25	A	4	10	ty	n	cam	27.6	14:06	EB
2017-06-25	A	4	20	or	n	clo	27.6	14:06	EB
2017-06-25	A	5		or	n	cam	27.6	14:06	EB
2017-06-25	A	5	25	or	n	cam	27.6	14:06	EB
2017-06-25	A	5	40	ty	n	cam	27.6	14:06	EB
2017-06-25	A	6	5	w	n	cam	27.6	14:06	EB
2017-06-25	A	6	26	or	n	cam	27.6	14:06	EB
2017-06-25	A	7	39	ty	n	fd	27.6	14:06	EB
2017-06-25	A	7	25	or	n	fd	27.6	14:06	EB
2017-06-25	A	8	43	ty	n	leg1	27.6	14:06	EB
2017-06-25	A	9	25	or	n	cam	27.6	14:06	EB
2017-06-25	A	10	8	ty	n	cam	27.6	14:06	EB
2017-06-25	A	10	40	ty	n	cam	27.6	14:06	EB
2017-06-25	A	11		ty	n	cam	27.6	14:06	EB
2017-06-25	A	11	14	or	n	yedai	27.6	14:06	EB
2017-06-25	A	12	20	or	n	leg1	27.6	14:06	EB
2017-06-25	A	13	25	or	n	cam	27.6	14:06	EB
2017-06-25	A	14	6	ty	hd	pop	27.6	14:06	EB
2017-06-25	A	15	39	ty	n	fd	27.6	14:06	EB
2017-06-25	A	16	5	w	n	cam	27.6	14:06	EB
2017-06-25	A	16	40	ty	n	cam	27.6	14:06	EB
2017-06-25	A	17			n	yedai	27.6	14:06	EB
2017-06-25	A	18	8	ty	n	cam	27.6	14:06	EB
2017-06-25	A	18		ty	n	cam	27.6	14:06	EB
2017-06-25	A	20	30	or	n	leg1	27.6	14:06	EB
2017-06-25	A	20	19	ty	n	cam	27.6	14:06	EB
2017-06-25	B	1	waxed over		n	cam	30.8	1904-01-01 14:32:00	EB
2017-06-25	B	1		bl	n	cam	30.8	1904-01-01 14:32:00	EB
2017-06-25	B	1		or	n	cam	30.8	1904-01-01 14:32:00	EB
2017-06-25	B	2	11	bl	n	cam	30.8	1904-01-01 14:32:00	EB
2017-06-25	B	2	22	or	n	cam	30.8	1904-01-01 14:32:00	EB
2017-06-25	B	2	12	li	n	cam	30.8	1904-01-01 14:32:00	EB
2017-06-25	B	3	23	or	n	cam	30.8	1904-01-01 14:32:00	EB
2017-06-25	B	3	39	y	n	cam	30.8	1904-01-01 14:32:00	EB
2017-06-25	B	4	23	or	n	cam	30.8	1904-01-01 14:32:00	EB
2017-06-25	B	4	23	li	n	cam	30.8	1904-01-01 14:32:00	EB
2017-06-25	B	5	unm male		n	fd	30.8	1904-01-01 14:32:00	EB
2017-06-25	B	5	32	y	groom	cam	30.8	1904-01-01 14:32:00	EB
2017-06-25	B	6	39	bl	n	cam	30.8	1904-01-01 14:32:00	EB
2017-06-25	B	6	32	y	p	cam	30.8	1904-01-01 14:32:00	EB
2017-06-25	B	7	32	tbl	p	fd	30.8	1904-01-01 14:32:00	EB
2017-06-25	B	7	10	y	n	cam	30.8	1904-01-01 14:32:00	EB
2017-06-25	B	8	33	tbl	n	cam	30.8	1904-01-01 14:32:00	EB
2017-06-25	B	8	31	or	hd	pop	30.8	1904-01-01 14:32:00	EB
2017-06-25	B	9	39	bl	n	cam	30.8	1904-01-01 14:32:00	EB
2017-06-25	B	9	32	or	n	cam	30.8	1904-01-01 14:32:00	EB
2017-06-25	B	11	23	li	n	cam	30.8	1904-01-01 14:32:00	EB
2017-06-25	B	11		li	n	cam	30.8	1904-01-01 14:32:00	EB
2017-06-25	B	11	25	or	n	cam	30.8	1904-01-01 14:32:00	EB
2017-06-25	B	12	22	or	n	cam	30.8	1904-01-01 14:32:00	EB
2017-06-25	B	12	24	or	n	cam	30.8	1904-01-01 14:32:00	EB
2017-06-25	B	13	30	y	n	cam	30.8	1904-01-01 14:32:00	EB
2017-06-25	B	13	4	li	n	cam	30.8	1904-01-01 14:32:00	EB
2017-06-25	B	13	4	li	n	cam	30.8	1904-01-01 14:32:00	EB
2017-06-25	B	14	39	bl	n	cam	30.8	1904-01-01 14:32:00	EB
2017-06-25	B	14	39	or	n	cam	30.8	1904-01-01 14:32:00	EB
2017-06-25	B	14		y	n	cam	30.8	1904-01-01 14:32:00	EB
2017-06-25	B	14		bl	n	cam	30.8	1904-01-01 14:32:00	EB
2017-06-25	B	15	2	or	n	cam	30.8	1904-01-01 14:32:00	EB
2017-06-25	B	16	5	bl	n	cam	30.8	1904-01-01 14:32:00	EB
2017-06-25	B	16	9	li	n	cam	30.8	1904-01-01 14:32:00	EB
2017-06-25	B	17	7	li	n	cam	30.8	1904-01-01 14:32:00	EB
2017-06-25	B	17	32	or	n	cam	30.8	1904-01-01 14:32:00	EB
2017-06-25	B	17	10	y	n	cam	30.8	1904-01-01 14:32:00	EB
2017-06-25	B	17	38	w	n	cam	30.8	1904-01-01 14:32:00	EB
2017-06-25	B	18	13	or	n	cam	30.8	1904-01-01 14:32:00	EB
2017-06-25	B	19	29	or	n	cam	30.8	1904-01-01 14:32:00	EB
2017-06-25	B	19		or	n	cam	30.8	1904-01-01 14:32:00	EB
2017-06-25	B	19	39	bl	n	cam	30.8	1904-01-01 14:32:00	EB
2017-06-25	B	20	10	y	n	cam	30.8	1904-01-01 14:32:00	EB
2017-06-25	B	20	38	w	n	cam	30.8	1904-01-01 14:32:00	EB
2017-06-25	C	1		y	n	cam	no T	no time	EB
2017-06-25	C	1		li	n	cam	no T	no time	EB
2017-06-25	C	1		or	n	cam	no T	no time	EB
2017-06-25	C	2		bl	n	leg1	no T	no time	EB
2017-06-25	C	2	31	or	n	cam	no T	no time	EB
2017-06-25	C	3	23	bl	n	fd	no T	no time	EB
2017-06-25	C	3		li	n	fd	no T	no time	EB
2017-06-25	C	3	16	li	n	cam	no T	no time	EB
2017-06-25	C	3	1	or	n	cam	no T	no time	EB
2017-06-25	C	3	3	li	n	cam	no T	no time	EB
2017-06-25	C	4	38	or	p	fd	no T	no time	EB
2017-06-25	C	5	14	or	n	fd	no T	no time	EB
2017-06-25	C	5		li	n	fd	no T	no time	EB
2017-06-25	C	6	33	li	n	cam	no T	no time	EB
2017-06-25	C	6	11	or	n	cam	no T	no time	EB
2017-06-25	C	7			n	cam	no T	no time	EB
2017-06-25	C	7		or	n	cam	no T	no time	EB
2017-06-25	C	8	34	li	n	cam	no T	no time	EB
2017-06-25	C	8	31	or	n	cam	no T	no time	EB
2017-06-25	C	8		or	n	clo	no T	no time	EB
2017-06-25	C	9	38	li	n	fd	no T	no time	EB
2017-06-25	C	10	10	li	n	cam	no T	no time	EB
2017-06-25	C	10	26	li	n	cam	no T	no time	EB
2017-06-25	C	10	18	li	n	fd	no T	no time	EB
2017-06-25	C	11		or	n	cam	no T	no time	EB
2017-06-25	C	12	14	or	n	cam	no T	no time	EB
2017-06-25	C	12	22	li	n	cam	no T	no time	EB
2017-06-25	C	14	18	li	n	cam	no T	no time	EB
2017-06-25	C	14	34	li	n	fd	no T	no time	EB
2017-06-25	C	14	39	or	n	fd	no T	no time	EB
2017-06-25	C	15	36	li	n	fd	no T	no time	EB
2017-06-25	C	15	35	li	n	cam	no T	no time	EB
2017-06-25	C	16	14	or	n	cam	no T	no time	EB
2017-06-25	C	16	21	bl	n	cam	no T	no time	EB
2017-06-25	C	18	2	li	n	cam	no T	no time	EB
2017-06-25	C	19	14	bl	n	cam	no T	no time	EB
2017-06-25	C	20	36	li	n	cam	no T	no time	EB
2017-06-25	C	20	14	or	n	cam	no T	no time	EB
2017-06-25	C	20	19	li	n	cam	no T	no time	EB
2017-06-25	C	20	33	li	n	cam	no T	no time	EB
2017-06-25	C	20	35	li	n	cam	no T	no time	EB
2017-06-25	C	20	22	li	n	cam	no T	no time	EB
2017-06-29	F	1	14	y	n	cam	28.6	1904-01-01 14:07:00	JB
2017-06-29	F	1	21	or	n	cam	28.6	1904-01-01 14:07:00	JB
2017-06-29	F	1	15	bl	n	cam	28.6	1904-01-01 14:07:00	JB
2017-06-29	F	1	26	or	n	rclo	28.6	1904-01-01 14:07:00	JB
2017-06-29	F	2	47	w	n	cam	28.6	1904-01-01 14:07:00	JB
2017-06-29	F	3	um male		n	cam	28.6	1904-01-01 14:07:00	JB
2017-06-29	F	4	um male		n	cam	28.6	1904-01-01 14:07:00	JB
2017-06-29	F	5		li	n	cam	28.6	1904-01-01 14:07:00	JB
2017-06-29	F	6		li	p	pop	28.6	1904-01-01 14:07:00	JB
2017-06-29	F	6	12	li	n	wclo	28.6	1904-01-01 14:07:00	JB
2017-06-29	F	7	4	w	n	cam	28.6	1904-01-01 14:07:00	JB
2017-06-29	F	7	14	y	n	cam	28.6	1904-01-01 14:07:00	JB
2017-06-29	F	8	21	or	n	cam	28.6	1904-01-01 14:07:00	JB
2017-06-29	F	8	15	bl	n	cam	28.6	1904-01-01 14:07:00	JB
2017-06-29	F	9		li	n	leg1	28.6	1904-01-01 14:07:00	JB
2017-06-29	F	9	26	or	n	cam	28.6	1904-01-01 14:07:00	JB
2017-06-29	F	9	31	w	n	cam	28.6	1904-01-01 14:07:00	JB
2017-06-29	F	11	12	li	n	cam	28.6	1904-01-01 14:07:00	JB
2017-06-29	F	12	31	w	n	cam	28.6	1904-01-01 14:07:00	JB
2017-06-29	F	13	12	li	n	wclo	28.6	1904-01-01 14:07:00	JB
2017-06-29	F	14	47	w	n	cam	28.6	1904-01-01 14:07:00	JB
2017-06-29	F	14	21	or	n	cam	28.6	1904-01-01 14:07:00	JB
2017-06-29	F	15	40	w	n	cam	28.6	1904-01-01 14:07:00	JB
2017-06-29	F	15	47	w	n	cam	28.6	1904-01-01 14:07:00	JB
2017-06-29	F	15	31	w	n	cam	28.6	1904-01-01 14:07:00	JB
2017-06-29	F	16	9	li	n	cam	28.6	1904-01-01 14:07:00	JB
2017-06-29	F	16		or	n	leg1	28.6	1904-01-01 14:07:00	JB
2017-06-29	F	16	30	li	n	kw	28.6	1904-01-01 14:07:00	JB
2017-06-29	F	17	26	or	n	cam	28.6	1904-01-01 14:07:00	JB
2017-06-29	F	18	12	li	n	cam	28.6	1904-01-01 14:07:00	JB
2017-06-29	F	19	30	li	n	wclo	28.6	1904-01-01 14:07:00	JB
2017-06-29	F	20	31	w	n	cam	28.6	1904-01-01 14:07:00	JB
2017-06-29	F	20		w	n	leg1	28.6	1904-01-01 14:07:00	JB
2017-06-29	B	1	4	li	n	cam	24.4	1904-01-01 14:32:00	JB
2017-06-29	B	1	22	li	n	cam	24.4	1904-01-01 14:32:00	JB
2017-06-29	B	2		bl	n	cam	24.4	1904-01-01 14:32:00	JB
2017-06-29	B	2		bl	n	cam	24.4	1904-01-01 14:32:00	JB
2017-06-29	B	3	39	w	n	cam	24.4	1904-01-01 14:32:00	JB
2017-06-29	B	4	11	bl	n	cam	24.4	1904-01-01 14:32:00	JB
2017-06-29	B	4	32	tbl	n	cam	24.4	1904-01-01 14:32:00	JB
2017-06-29	B	4	11	bl	n	rclo	24.4	1904-01-01 14:32:00	JB
2017-06-29	B	5		tbl	n	cam	24.4	1904-01-01 14:32:00	JB
2017-06-29	B	5	22	li	n	cam	24.4	1904-01-01 14:32:00	JB
2017-06-29	B	6	25	or	n	cam	24.4	1904-01-01 14:32:00	JB
2017-06-29	B	8		tbl	p	pop	24.4	1904-01-01 14:32:00	JB
2017-06-29	B	8	23	li	n	cam	24.4	1904-01-01 14:32:00	JB
2017-06-29	B	8	22	or	n	cam	24.4	1904-01-01 14:32:00	JB
2017-06-29	B	9		tbl	n	cam	24.4	1904-01-01 14:32:00	JB
2017-06-29	B	9	23	li	n	cam	24.4	1904-01-01 14:32:00	JB
2017-06-29	B	10	36	bl	p	pop	24.4	1904-01-01 14:32:00	JB
2017-06-29	B	10	25	or	n	cam	24.4	1904-01-01 14:32:00	JB
2017-06-29	B	10		tbl	n	cam	24.4	1904-01-01 14:32:00	JB
2017-06-29	B	11		tbl	n	cam	24.4	1904-01-01 14:32:00	JB
2017-06-29	B	11	39	w	n	cam	24.4	1904-01-01 14:32:00	JB
2017-06-29	B	12		bl	n	cam	24.4	1904-01-01 14:32:00	JB
2017-06-29	B	12	32	or	n	cam	24.4	1904-01-01 14:32:00	JB
2017-06-29	B	13	2	li	n	cam	24.4	1904-01-01 14:32:00	JB
2017-06-29	B	13		bl	n	cam	24.4	1904-01-01 14:32:00	JB
2017-06-29	B	13		bl	n	cam	24.4	1904-01-01 14:32:00	JB
2017-06-29	B	13	4	li	n	cam	24.4	1904-01-01 14:32:00	JB
2017-06-29	B	13	41	li	n	cam	24.4	1904-01-01 14:32:00	JB
2017-06-29	B	14	20	y	n	cam	24.4	1904-01-01 14:32:00	JB
2017-06-29	B	14	32	y	n	yedai	24.4	1904-01-01 14:32:00	JB
2017-06-29	B	15	39	w	n	cam	24.4	1904-01-01 14:32:00	JB
2017-06-29	B	15	25	or	n	cam	24.4	1904-01-01 14:32:00	JB
2017-06-29	B	16	39	bl	p	pop	24.4	1904-01-01 14:32:00	JB
2017-06-29	B	16	27	or	n	cam	24.4	1904-01-01 14:32:00	JB
2017-06-29	B	17	36	tbl	n	cam	24.4	1904-01-01 14:32:00	JB
2017-06-29	B	17	22	li	n	cam	24.4	1904-01-01 14:32:00	JB
2017-06-29	B	18		bl	n	cam	24.4	1904-01-01 14:32:00	JB
2017-06-29	B	18	11	bl	n	cam	24.4	1904-01-01 14:32:00	JB
2017-06-29	B	18	39	y	n	cam	24.4	1904-01-01 14:32:00	JB
2017-06-29	B	19	42	li	n	cam	24.4	1904-01-01 14:32:00	JB
2017-06-29	B	19	4	li	n	cam	24.4	1904-01-01 14:32:00	JB
2017-06-29	B	19	33	w	n	cam	24.4	1904-01-01 14:32:00	JB
2017-06-29	B	19		tbl	n	cam	24.4	1904-01-01 14:32:00	JB
2017-06-29	B	20	35	bl	n	cam	24.4	1904-01-01 14:32:00	JB
2017-06-29	B	20		or	n	cam	24.4	1904-01-01 14:32:00	JB
2017-06-29	B	20	25	or	n	cam	24.4	1904-01-01 14:32:00	JB
2017-06-29	B	20	11	bl	n	cam	24.4	1904-01-01 14:32:00	JB
2017-06-29	A	1	25	or	n	cam	25.6	1904-01-01 14:58:00	JB
2017-06-29	A	1	12	w	n	cam	25.6	1904-01-01 14:58:00	JB
2017-06-29	A	2		or	n	cam	25.6	1904-01-01 14:58:00	JB
2017-06-29	A	2		ty	n	cam	25.6	1904-01-01 14:58:00	JB
2017-06-29	A	3	42	or	n	leg1	25.6	1904-01-01 14:58:00	JB
2017-06-29	A	4	42	or	p	pop	25.6	1904-01-01 14:58:00	JB
2017-06-29	A	4	25	or	n	cam	25.6	1904-01-01 14:58:00	JB
2017-06-29	A	4	12	w	n	cam	25.6	1904-01-01 14:58:00	JB
2017-06-29	A	4		ty	n	cam	25.6	1904-01-01 14:58:00	JB
2017-06-29	A	5	3	w	n	cam	25.6	1904-01-01 14:58:00	JB
2017-06-29	A	5	5	or	n	cam	25.6	1904-01-01 14:58:00	JB
2017-06-29	A	6	25	or	n	cam	25.6	1904-01-01 14:58:00	JB
2017-06-29	A	6	14	or	n	cam	25.6	1904-01-01 14:58:00	JB
2017-06-29	A	6		ty	n	cam	25.6	1904-01-01 14:58:00	JB
2017-06-29	A	8		or	n	cam	25.6	1904-01-01 14:58:00	JB
2017-06-29	A	8		or	p	pop	25.6	1904-01-01 14:58:00	JB
2017-06-29	A	8	8	w	n	cam	25.6	1904-01-01 14:58:00	JB
2017-06-29	A	9	3	w	n	cam	25.6	1904-01-01 14:58:00	JB
2017-06-29	A	10	5	or	n	cam	25.6	1904-01-01 14:58:00	JB
2017-06-29	A	11	25	or	n	cam	25.6	1904-01-01 14:58:00	JB
2017-06-29	A	11	12	w	n	cam	25.6	1904-01-01 14:58:00	JB
2017-06-29	A	11	8	w	n	cam	25.6	1904-01-01 14:58:00	JB
2017-06-29	A	12	30	or	n	rclo	25.6	1904-01-01 14:58:00	JB
2017-06-29	A	14	20	ty	n	wclo	25.6	1904-01-01 14:58:00	JB
2017-06-29	A	14	25	or	n	cam	25.6	1904-01-01 14:58:00	JB
2017-06-29	A	15		or	n	cam	25.6	1904-01-01 14:58:00	JB
2017-06-29	A	15	10	or	n	cam	25.6	1904-01-01 14:58:00	JB
2017-06-29	A	16	5	w	n	cam	25.6	1904-01-01 14:58:00	JB
2017-06-29	A	16		or	n	cam	25.6	1904-01-01 14:58:00	JB
2017-06-29	A	17	12	w	n	cam	25.6	1904-01-01 14:58:00	JB
2017-06-29	A	17		ty	n	cam	25.6	1904-01-01 14:58:00	JB
2017-06-29	A	17	3	w	n	cam	25.6	1904-01-01 14:58:00	JB
2017-06-29	A	18	8	w	n	cam	25.6	1904-01-01 14:58:00	JB
2017-06-29	A	18	14	or	n	cam	25.6	1904-01-01 14:58:00	JB
2017-06-29	A	19	30	or	n	cam	25.6	1904-01-01 14:58:00	JB
2017-06-29	A	20		or	n	cam	25.6	1904-01-01 14:58:00	JB
2017-06-29	A	20	3	w	n	cam	25.6	1904-01-01 14:58:00	JB
2017-06-29	C	1	2	tg	n	cam	26.4	1904-01-01 14:00:00	EB
2017-06-29	C	1	lost tag		n	cam	26.4	1904-01-01 14:00:00	EB
2017-06-29	C	3	33	li	n	cam	26.4	1904-01-01 14:00:00	EB
2017-06-29	C	4	19	or	n	cam	26.4	1904-01-01 14:00:00	EB
2017-06-29	C	5	22	li	n	cam	26.4	1904-01-01 14:00:00	EB
2017-06-29	C	5	14	or	n	cam	26.4	1904-01-01 14:00:00	EB
2017-06-29	C	6	38	li	n	fd	26.4	1904-01-01 14:00:00	EB
2017-06-29	C	7		bl	n	cam	26.4	1904-01-01 14:00:00	EB
2017-06-29	C	7	41	bl	n	cam	26.4	1904-01-01 14:00:00	EB
2017-06-29	C	7	31	or	n	cam	26.4	1904-01-01 14:00:00	EB
2017-06-29	C	8	14	bl	n	cam	26.4	1904-01-01 14:00:00	EB
2017-06-29	C	8	41	bl	n	cam	26.4	1904-01-01 14:00:00	EB
2017-06-29	C	8	19	li	n	cam	26.4	1904-01-01 14:00:00	EB
2017-06-29	C	8	14	bl	n	cam	26.4	1904-01-01 14:00:00	EB
2017-06-29	C	9	41	bl	n	cam	26.4	1904-01-01 14:00:00	EB
2017-06-29	C	9	19	li	n	cam	26.4	1904-01-01 14:00:00	EB
2017-06-29	C	10		li	n	cam	26.4	1904-01-01 14:00:00	EB
2017-06-29	C	10	12	bl	n	cam	26.4	1904-01-01 14:00:00	EB
2017-06-29	C	10	33	li	n	cam	26.4	1904-01-01 14:00:00	EB
2017-06-29	C	11	21	li	n	cam	26.4	1904-01-01 14:00:00	EB
2017-06-29	C	12	22	li	n	cam	26.4	1904-01-01 14:00:00	EB
2017-06-29	C	12	22	bl	n	cam	26.4	1904-01-01 14:00:00	EB
2017-06-29	C	12	wo?	bl	n	cam	26.4	1904-01-01 14:00:00	EB
2017-06-29	C	12	31	or	n	cam	26.4	1904-01-01 14:00:00	EB
2017-06-29	C	13	11	or	n	cam	26.4	1904-01-01 14:00:00	EB
2017-06-29	C	13	lost tag		n	cam	26.4	1904-01-01 14:00:00	EB
2017-06-29	C	13	23		n	cam	26.4	1904-01-01 14:00:00	EB
2017-06-29	C	14	19	li	n	cam	26.4	1904-01-01 14:00:00	EB
2017-06-29	C	15	39	bl	n	cam	26.4	1904-01-01 14:00:00	EB
2017-06-29	C	16	41	bl	n	cam	26.4	1904-01-01 14:00:00	EB
2017-06-29	C	16	19	or	n	leg1	26.4	1904-01-01 14:00:00	EB
2017-06-29	C	17	22	bl	n	cam	26.4	1904-01-01 14:00:00	EB
2017-06-29	C	17	wo?	bl	n	cam	26.4	1904-01-01 14:00:00	EB
2017-06-29	C	18	21	li	n	cam	26.4	1904-01-01 14:00:00	EB
2017-06-29	C	18	22	li	n	cam	26.4	1904-01-01 14:00:00	EB
2017-06-29	C	18	14	bl	n	cam	26.4	1904-01-01 14:00:00	EB
2017-06-29	C	18	lost tag		n	cam	26.4	1904-01-01 14:00:00	EB
2017-06-29	C	18	2	bl	n	cam	26.4	1904-01-01 14:00:00	EB
2017-06-29	C	18	lost tag		n	cam	26.4	1904-01-01 14:00:00	EB
2017-06-29	C	19	16	bl	n	rclo	26.4	1904-01-01 14:00:00	EB
2017-06-29	C	20	23	bl	n	cam	26.4	1904-01-01 14:00:00	EB
2017-06-29	C	20	22	bl	n	cam	26.4	1904-01-01 14:00:00	EB
2017-06-29	E	1	23	or	n	rclo	25.5	1904-01-01 14:30:00	EB
2017-06-29	E	1	20	bl	n	cam	25.5	1904-01-01 14:30:00	EB
2017-06-29	E	2	28	bl	n	cam	25.5	1904-01-01 14:30:00	EB
2017-06-29	E	2	23	or	n	ox	25.5	1904-01-01 14:30:00	EB
2017-06-29	E	2	11	bl	n	cam	25.5	1904-01-01 14:30:00	EB
2017-06-29	E	2	20	li	n	rclo	25.5	1904-01-01 14:30:00	EB
2017-06-29	E	4	51	li	n	cam	25.5	1904-01-01 14:30:00	EB
2017-06-29	E	4		li	n	cam	25.5	1904-01-01 14:30:00	EB
2017-06-29	E	6	50	li	n	leg1	25.5	1904-01-01 14:30:00	EB
2017-06-29	E	6		bl	n	cam	25.5	1904-01-01 14:30:00	EB
2017-06-29	E	7	28	bl	n	cam	25.5	1904-01-01 14:30:00	EB
2017-06-29	E	8		li	n	kw	25.5	1904-01-01 14:30:00	EB
2017-06-29	E	10	20	li	n	rclo	25.5	1904-01-01 14:30:00	EB
2017-06-29	E	10	23	or	n	cam	25.5	1904-01-01 14:30:00	EB
2017-06-29	E	12	23	or	n	cam	25.5	1904-01-01 14:30:00	EB
2017-06-29	E	13	51	li	n	cam	25.5	1904-01-01 14:30:00	EB
2017-06-29	E	13		li	n	cam	25.5	1904-01-01 14:30:00	EB
2017-06-29	E	14	28	li	n	cam	25.5	1904-01-01 14:30:00	EB
2017-06-29	E	14		bl	n	cam	25.5	1904-01-01 14:30:00	EB
2017-06-29	E	15	43	li	n	cam	25.5	1904-01-01 14:30:00	EB
2017-06-29	E	15	48	li	n	cam	25.5	1904-01-01 14:30:00	EB
2017-06-29	E	16	8	bl	n	cam	25.5	1904-01-01 14:30:00	EB
2017-06-29	E	17		bl	n	cam	25.5	1904-01-01 14:30:00	EB
2017-06-29	E	18	50	li	n	cam	25.5	1904-01-01 14:30:00	EB
2017-06-29	E	18	23	or	n	cam	25.5	1904-01-01 14:30:00	EB
2017-06-29	E	18		li	n	cam	25.5	1904-01-01 14:30:00	EB
2017-06-29	E	20	20	bl	n	cam	25.5	1904-01-01 14:30:00	EB
2017-06-29	E	20	20	bl	n	cam	25.5	1904-01-01 14:30:00	EB
2017-06-29	E	20	28	bl	n	cam	25.5	1904-01-01 14:30:00	EB
2017-06-29	E	20	2	bl	n	wclo	25.5	1904-01-01 14:30:00	EB
2017-06-29	E	20	43	li	n	cam	25.5	1904-01-01 14:30:00	EB
2017-06-29	D	1	14	or	n	yedai	24.9	1904-01-01 14:54:00	EB
2017-06-29	D	2	13	w	n	cam	24.9	1904-01-01 14:54:00	EB
2017-06-29	D	3	4	w	n	cam	24.9	1904-01-01 14:54:00	EB
2017-06-29	D	3		w	n	cam	24.9	1904-01-01 14:54:00	EB
2017-06-29	D	4	23	or	p	pop	24.9	1904-01-01 14:54:00	EB
2017-06-29	D	4	4	or	n	rclo	24.9	1904-01-01 14:54:00	EB
2017-06-29	D	5	32	tg	n	kw	24.9	1904-01-01 14:54:00	EB
2017-06-29	D	5		or	n	kw	24.9	1904-01-01 14:54:00	EB
2017-06-29	D	6	3	w	n	cam	24.9	1904-01-01 14:54:00	EB
2017-06-29	D	6	4	or	n	rclo	24.9	1904-01-01 14:54:00	EB
2017-06-29	D	6	32	tg	n	rclo	24.9	1904-01-01 14:54:00	EB
2017-06-29	D	7		w	n	cam	24.9	1904-01-01 14:54:00	EB
2017-06-29	D	7	3	w	n	cam	24.9	1904-01-01 14:54:00	EB
2017-06-29	D	10	12	or	n	wclo	24.9	1904-01-01 14:54:00	EB
2017-06-29	D	11	4	w	n	cam	24.9	1904-01-01 14:54:00	EB
2017-06-29	D	11	3	w	n	cam	24.9	1904-01-01 14:54:00	EB
2017-06-29	D	11		tg	n	wclo	24.9	1904-01-01 14:54:00	EB
2017-06-29	D	12	4	or	n	rclo	24.9	1904-01-01 14:54:00	EB
2017-06-29	D	12		tg	n	leg1	24.9	1904-01-01 14:54:00	EB
2017-06-29	D	13	51	tg	n	cam	24.9	1904-01-01 14:54:00	EB
2017-06-29	D	14	4	w	n	cam	24.9	1904-01-01 14:54:00	EB
2017-06-29	D	15		tg	n	leg1	24.9	1904-01-01 14:54:00	EB
2017-06-29	D	16	32	tg	n	leg1	24.9	1904-01-01 14:54:00	EB
2017-06-29	D	17		tg	n	leg1	24.9	1904-01-01 14:54:00	EB
2017-06-29	D	17	3	w	n	cam	24.9	1904-01-01 14:54:00	EB
2017-06-29	D	18	42	or	p	pop	24.9	1904-01-01 14:54:00	EB
2017-06-29	D	19	3	w	n	cam	24.9	1904-01-01 14:54:00	EB
2017-06-29	D	19	32	tg	n	cam	24.9	1904-01-01 14:54:00	EB
2017-06-29	D	20	4	w	n	cam	24.9	1904-01-01 14:54:00	EB
2017-06-29	D	20	32	tg	n	kw	24.9	1904-01-01 14:54:00	EB
2017-06-29	D	20	38	tg	n	cam	24.9	1904-01-01 14:54:00	EB
2017-06-29	D	20	3	w	n	cam	24.9	1904-01-01 14:54:00	EB
2017-07-03	B	1	24	or	n	cam	33.4	1904-01-01 14:05:00	JB
2017-07-03	B	1	42	li	n	cam	33.4	1904-01-01 14:05:00	JB
2017-07-03	B	2	16	w	n	kw	33.4	1904-01-01 14:05:00	JB
2017-07-03	B	2	46	y	n	cam	33.4	1904-01-01 14:05:00	JB
2017-07-03	B	2	1	bl	n	cam	33.4	1904-01-01 14:05:00	JB
2017-07-03	B	4	39	bl	n	yedai	33.4	1904-01-01 14:05:00	JB
2017-07-03	B	4	32	or	n	cam	33.4	1904-01-01 14:05:00	JB
2017-07-03	B	4	39	y	n	cam	33.4	1904-01-01 14:05:00	JB
2017-07-03	B	4	28	li	n	cam	33.4	1904-01-01 14:05:00	JB
2017-07-03	B	4	25	or	n	cam	33.4	1904-01-01 14:05:00	JB
2017-07-03	B	5	12	bl	n	rclo	33.4	1904-01-01 14:05:00	JB
2017-07-03	B	5		tbl	n	cam	33.4	1904-01-01 14:05:00	JB
2017-07-03	B	6	46	y	n	cam	33.4	1904-01-01 14:05:00	JB
2017-07-03	B	6		tbl	n	cam	33.4	1904-01-01 14:05:00	JB
2017-07-03	B	7	32	or	n	cam	33.4	1904-01-01 14:05:00	JB
2017-07-03	B	8	42	li	n	cam	33.4	1904-01-01 14:05:00	JB
2017-07-03	B	8	22	li	n	cam	33.4	1904-01-01 14:05:00	JB
2017-07-03	B	9	39	y	n	cam	33.4	1904-01-01 14:05:00	JB
2017-07-03	B	9	23	li	n	cam	33.4	1904-01-01 14:05:00	JB
2017-07-03	B	9	11	bl	n	cam	33.4	1904-01-01 14:05:00	JB
2017-07-03	B	10	20	y	n	yedai	33.4	1904-01-01 14:05:00	JB
2017-07-03	B	11		or	n	cam	33.4	1904-01-01 14:05:00	JB
2017-07-03	B	11	39	bl	n	cam	33.4	1904-01-01 14:05:00	JB
2017-07-03	B	12	11	bl	n	cam	33.4	1904-01-01 14:05:00	JB
2017-07-03	B	12	46	y	n	cam	33.4	1904-01-01 14:05:00	JB
2017-07-03	B	13	32	or	n	cam	33.4	1904-01-01 14:05:00	JB
2017-07-03	B	13	20	li	n	cam	33.4	1904-01-01 14:05:00	JB
2017-07-03	B	13	24	or	n	cam	33.4	1904-01-01 14:05:00	JB
2017-07-03	B	14	24	or	n	cam	33.4	1904-01-01 14:05:00	JB
2017-07-03	B	14	42	li	n	cam	33.4	1904-01-01 14:05:00	JB
2017-07-03	B	14	36	tbl	n	cam	33.4	1904-01-01 14:05:00	JB
2017-07-03	B	14	25	or	n	cam	33.4	1904-01-01 14:05:00	JB
2017-07-03	B	15	11	bl	n	cam	33.4	1904-01-01 14:05:00	JB
2017-07-03	B	15	33	y	n	cam	33.4	1904-01-01 14:05:00	JB
2017-07-03	B	16	1	bl	n	cam	33.4	1904-01-01 14:05:00	JB
2017-07-03	B	16	29	li	n	cam	33.4	1904-01-01 14:05:00	JB
2017-07-03	B	16	12	bl	n	cam	33.4	1904-01-01 14:05:00	JB
2017-07-03	B	17	23	li	n	cam	33.4	1904-01-01 14:05:00	JB
2017-07-03	B	18	32	or	n	cam	33.4	1904-01-01 14:05:00	JB
2017-07-03	B	18	46	bl	n	cam	33.4	1904-01-01 14:05:00	JB
2017-07-03	B	18	29	bl	n	cam	33.4	1904-01-01 14:05:00	JB
2017-07-03	B	18	23	li	n	cam	33.4	1904-01-01 14:05:00	JB
2017-07-03	B	19	24	or	n	cam	33.4	1904-01-01 14:05:00	JB
2017-07-03	B	19	42	li	n	cam	33.4	1904-01-01 14:05:00	JB
2017-07-03	B	19	36	tbl	n	cam	33.4	1904-01-01 14:05:00	JB
2017-07-03	B	19		or	n	cam	33.4	1904-01-01 14:05:00	JB
2017-07-03	B	20	24	or	n	cam	33.4	1904-01-01 14:05:00	JB
2017-07-03	C	1	8	or	n	cam	23.5	1904-01-01 14:37:00	JB
2017-07-03	C	1	23	li	n	cam	23.5	1904-01-01 14:37:00	JB
2017-07-03	C	1	21	li	n	cam	23.5	1904-01-01 14:37:00	JB
2017-07-03	C	2	36	li	n	rclo	23.5	1904-01-01 14:37:00	JB
2017-07-03	C	2	36	li	n	rclo	23.5	1904-01-01 14:37:00	JB
2017-07-03	C	2	19	or	n	cam	23.5	1904-01-01 14:37:00	JB
2017-07-03	C	3	36	bl	n	cam	23.5	1904-01-01 14:37:00	JB
2017-07-03	C	3	44	bl	n	cam	23.5	1904-01-01 14:37:00	JB
2017-07-03	C	4	39	bl	n	cam	23.5	1904-01-01 14:37:00	JB
2017-07-03	C	4	21	li	n	cam	23.5	1904-01-01 14:37:00	JB
2017-07-03	C	5	41	bl	n	cam	23.5	1904-01-01 14:37:00	JB
2017-07-03	C	5	14	or	n	cam	23.5	1904-01-01 14:37:00	JB
2017-07-03	C	6	4	bl	n	cam	23.5	1904-01-01 14:37:00	JB
2017-07-03	C	6	23	li	n	cam	23.5	1904-01-01 14:37:00	JB
2017-07-03	C	7	33	li	n	cam	23.5	1904-01-01 14:37:00	JB
2017-07-03	C	7	unm		n	cam	23.5	1904-01-01 14:37:00	JB
2017-07-03	C	7		bl	n	cam	23.5	1904-01-01 14:37:00	JB
2017-07-03	C	8	14	or	n	yedai	23.5	1904-01-01 14:37:00	JB
2017-07-03	C	9	39	bl	n	cam	23.5	1904-01-01 14:37:00	JB
2017-07-03	C	9	19	or	n	cam	23.5	1904-01-01 14:37:00	JB
2017-07-03	C	10	38	li	n	rclo	23.5	1904-01-01 14:37:00	JB
2017-07-03	C	10	33	li	n	rclo	23.5	1904-01-01 14:37:00	JB
2017-07-03	C	11	11	bl	n	cam	23.5	1904-01-01 14:37:00	JB
2017-07-03	C	12	23	li	n	cam	23.5	1904-01-01 14:37:00	JB
2017-07-03	C	12	23	bl	n	cam	23.5	1904-01-01 14:37:00	JB
2017-07-03	C	13	14	bl	n	leg1	23.5	1904-01-01 14:37:00	JB
2017-07-03	C	13	41	bl	n	cam	23.5	1904-01-01 14:37:00	JB
2017-07-03	C	14	23	li	n	cam	23.5	1904-01-01 14:37:00	JB
2017-07-03	C	14	38	li	n	rclo	23.5	1904-01-01 14:37:00	JB
2017-07-03	C	15	38	li	n	cam	23.5	1904-01-01 14:37:00	JB
2017-07-03	C	16		bl	n	cam	23.5	1904-01-01 14:37:00	JB
2017-07-03	C	17	22	bl	n	cam	23.5	1904-01-01 14:37:00	JB
2017-07-03	C	18	unm		n	cam	23.5	1904-01-01 14:37:00	JB
2017-07-03	C	18		or	n	cam	23.5	1904-01-01 14:37:00	JB
2017-07-03	C	19	21	li	n	cam	23.5	1904-01-01 14:37:00	JB
2017-07-03	C	19	38	li	n	cam	23.5	1904-01-01 14:37:00	JB
2017-07-03	C	20	14	bl	n	cam	23.5	1904-01-01 14:37:00	JB
2017-07-03	C	20	14	or	n	cam	23.5	1904-01-01 14:37:00	JB
2017-07-03	E	1		bl	n	cam	23.6	1904-01-01 15:05:00	JB
2017-07-03	E	3	58	y	n	cam	23.6	1904-01-01 15:05:00	JB
2017-07-03	E	4	59	y	n	cam	23.6	1904-01-01 15:05:00	JB
2017-07-03	E	4	20	y	p	pop	23.6	1904-01-01 15:05:00	JB
2017-07-03	E	5	51	y	n	cam	23.6	1904-01-01 15:05:00	JB
2017-07-03	E	5	9	bl	n	cam	23.6	1904-01-01 15:05:00	JB
2017-07-03	E	6	20	y	p	pop	23.6	1904-01-01 15:05:00	JB
2017-07-03	E	7	59	y	n	cam	23.6	1904-01-01 15:05:00	JB
2017-07-03	E	7	58	y	n	cam	23.6	1904-01-01 15:05:00	JB
2017-07-03	E	8	37	bl	n	cam	23.6	1904-01-01 15:05:00	JB
2017-07-03	E	9	65	y	n	wclo	23.6	1904-01-01 15:05:00	JB
2017-07-03	E	12	65	y	n	cam	23.6	1904-01-01 15:05:00	JB
2017-07-03	E	12	59	y	n	cam	23.6	1904-01-01 15:05:00	JB
2017-07-03	E	12		bl	n	cam	23.6	1904-01-01 15:05:00	JB
2017-07-03	E	14	28	bl	n	cam	23.6	1904-01-01 15:05:00	JB
2017-07-03	E	15	19	y	n	cam	23.6	1904-01-01 15:05:00	JB
2017-07-03	E	16	58	y	n	cam	23.6	1904-01-01 15:05:00	JB
2017-07-03	E	16	32	bl	n	leg1	23.6	1904-01-01 15:05:00	JB
2017-07-03	E	17	51	y	n	cam	23.6	1904-01-01 15:05:00	JB
2017-07-03	E	18	20	bl	n	cam	23.6	1904-01-01 15:05:00	JB
2017-07-03	E	19	51	y	n	cam	23.6	1904-01-01 15:05:00	JB
2017-07-03	E	20	33	bl	n	cam	23.6	1904-01-01 15:05:00	JB
2017-07-03	E	20	58	y	n	cam	23.6	1904-01-01 15:05:00	JB
2017-07-03	A	1	57	or	n	cam			EB
2017-07-03	A	1		or	p	pop			EB
2017-07-03	A	2	15	w	n	cam			EB
2017-07-03	A	2	52	or	n	cam			EB
2017-07-03	A	2	46	or	n	cam			EB
2017-07-03	A	3	41	or	n	cam			EB
2017-07-03	A	3	52	or	n	cam			EB
2017-07-03	A	4		ty	n	cam			EB
2017-07-03	A	5	44	ty	n	cam			EB
2017-07-03	A	5		or	n	cam			EB
2017-07-03	A	5		or	n	cam			EB
2017-07-03	A	6		or	n	cam			EB
2017-07-03	A	7	1	ty	n	cam			EB
2017-07-03	A	7		or	p	pop			EB
2017-07-03	A	9	52	or	n	cam			EB
2017-07-03	A	9		ty	n	cam			EB
2017-07-03	A	10		or	n	cam			EB
2017-07-03	A	10	18	w	n	cam			EB
2017-07-03	A	12	14	or	p	cam			EB
2017-07-03	A	16		or	n	cam			EB
2017-07-03	A	16		ty	n	cam			EB
2017-07-03	A	17		ty	n	cam			EB
2017-07-03	A	18		or	n	yedai			EB
2017-07-03	A	18		or	n	wclo			EB
2017-07-03	A	19	52	or	n	cam			EB
2017-07-03	A	20		or	n	cam			EB
2017-07-03	A	20		ty	n	rclo			EB
2017-07-03	A	21?	15	w	n	cam			EB
2017-07-03	F	1		unm male	n	cam	24.8		EB
2017-07-03	F	1	40	w	n	cam	24.8		EB
2017-07-03	F	2	8	li	n	wclo	24.8		EB
2017-07-03	F	4	20	or	n	leg1	24.8		EB
2017-07-03	F	5	40	w	n	cam	24.8		EB
2017-07-03	F	5	7	li	n	cam	24.8		EB
2017-07-03	F	6	12	li	n	wclo	24.8		EB
2017-07-03	F	6	40	w	n	cam	24.8		EB
2017-07-03	F	6	42	y	n	cam	24.8		EB
2017-07-03	F	7	40	w	n	cam	24.8		EB
2017-07-03	F	7	29	ty	n	cam	24.8		EB
2017-07-03	F	7	40	w	n	cam	24.8		EB
2017-07-03	F	7	7	li	n	cam	24.8		EB
2017-07-03	F	7	12	li	n	wclo	24.8		EB
2017-07-03	F	7		unm male	n	cam	24.8		EB
2017-07-03	F	9	8	li	p	pop	24.8		EB
2017-07-03	F	9	47	w	n	cam	24.8		EB
2017-07-03	F	9		unm male	n	cam	24.8		EB
2017-07-03	F	10		unm male	n	cam	24.8		EB
2017-07-03	F	10	12	li	n	wclo	24.8		EB
2017-07-03	F	11	29	ty	n	cam	24.8		EB
2017-07-03	F	11	12	li	n	wclo	24.8		EB
2017-07-03	F	12	8	li	n	rclo	24.8		EB
2017-07-03	F	12		unm male	n	cam	24.8		EB
2017-07-03	F	13	7	li	n	wclo	24.8		EB
2017-07-03	F	14	8	li	p	pop	24.8		EB
2017-07-03	F	15	12	li	n	wclo	24.8		EB
2017-07-03	F	15	8	li	p	pop	24.8		EB
2017-07-03	F	16		unm male	n	leg1	24.8		EB
2017-07-03	F	177	42	w	n	cam	24.8		EB
2017-07-03	F	17	29	ty	n	cam	24.8		EB
2017-07-03	F	19	12	li	n	wclo	24.8		EB
2017-07-03	F	19		unm male	n	cam	24.8		EB
2017-07-03	F	20	7	li	n	cam	24.8		EB
2017-07-03	F	20	46	or	n	cam	24.8		EB
2017-07-03	F	20	8	li	p	wclo	24.8		EB
2017-07-03	D	1	40	tg	n	rclo	23.5	1904-01-01 15:03:00	EB
2017-07-03	D	1	44	tg	n	cam	23.5	1904-01-01 15:03:00	EB
2017-07-03	D	3	15	w	n	cam	23.5	1904-01-01 15:03:00	EB
2017-07-03	D	3	51	tg	n	cam	23.5	1904-01-01 15:03:00	EB
2017-07-03	D	3		w	n	wclo	23.5	1904-01-01 15:03:00	EB
2017-07-03	D	5	14	or	n	cam	23.5	1904-01-01 15:03:00	EB
2017-07-03	D	6	37	tg	n	rclo	23.5	1904-01-01 15:03:00	EB
2017-07-03	D	6	15	w	n	cam	23.5	1904-01-01 15:03:00	EB
2017-07-03	D	8		w	n	cam	23.5	1904-01-01 15:03:00	EB
2017-07-03	D	8	4	or	n	cam	23.5	1904-01-01 15:03:00	EB
2017-07-03	D	9	60	tg	n	rclo	23.5	1904-01-01 15:03:00	EB
2017-07-03	D	11	65	tg	n	wclo	23.5	1904-01-01 15:03:00	EB
2017-07-03	D	13	15	w	n	cam	23.5	1904-01-01 15:03:00	EB
2017-07-03	D	14		w	n	cam	23.5	1904-01-01 15:03:00	EB
2017-07-03	D	14	21	li	n	rclo	23.5	1904-01-01 15:03:00	EB
2017-07-03	D	15		li	n	cam	23.5	1904-01-01 15:03:00	EB
2017-07-03	D	16	21	li	n	rclo	23.5	1904-01-01 15:03:00	EB
2017-07-03	D	17	44	tg	n	cam	23.5	1904-01-01 15:03:00	EB
2017-07-03	D	20	32	tg	n	rclo	23.5	1904-01-01 15:03:00	EB
2017-07-03	D	20	27	w	n	cam	23.5	1904-01-01 15:03:00	EB
2017-07-07	C	1	10	li	n	cam	37.6	1904-01-01 14:13:00	JB
2017-07-07	C	1	30	li	n	cam	37.6	1904-01-01 14:13:00	JB
2017-07-07	C	1	21	li	n	cam	37.6	1904-01-01 14:13:00	JB
2017-07-07	C	2	38	li	n	leg1	37.6	1904-01-01 14:13:00	JB
2017-07-07	C	3	14	or	n	cam	37.6	1904-01-01 14:13:00	JB
2017-07-07	C	3	21	li	n	cam	37.6	1904-01-01 14:13:00	JB
2017-07-07	C	4	43	li	n	cam	37.6	1904-01-01 14:13:00	JB
2017-07-07	C	4	42	or	n	cam	37.6	1904-01-01 14:13:00	JB
2017-07-07	C	4	43	bl	n	cam	37.6	1904-01-01 14:13:00	JB
2017-07-07	C	5	unm		n	cam	37.6	1904-01-01 14:13:00	JB
2017-07-07	C	5		bl	n	cam	37.6	1904-01-01 14:13:00	JB
2017-07-07	C	5	46	or	n	rclo	37.6	1904-01-01 14:13:00	JB
2017-07-07	C	6		bl	n	cam	37.6	1904-01-01 14:13:00	JB
2017-07-07	C	6		bl	n	cam	37.6	1904-01-01 14:13:00	JB
2017-07-07	C	7	51	bl	n	cam	37.6	1904-01-01 14:13:00	JB
2017-07-07	C	7	42	or	n	cam	37.6	1904-01-01 14:13:00	JB
2017-07-07	C	8	24	li	n	wclo	37.6	1904-01-01 14:13:00	JB
2017-07-07	C	8	19	y	n	cam	37.6	1904-01-01 14:13:00	JB
2017-07-07	C	8	6	or	n	cam	37.6	1904-01-01 14:13:00	JB
2017-07-07	C	9	46	or	n	rclo	37.6	1904-01-01 14:13:00	JB
2017-07-07	C	9	41	bl	n	cam	37.6	1904-01-01 14:13:00	JB
2017-07-07	C	9	50	bl	n	cam	37.6	1904-01-01 14:13:00	JB
2017-07-07	C	9	33	li	n	rclo	37.6	1904-01-01 14:13:00	JB
2017-07-07	C	10	14	or	n	cam	37.6	1904-01-01 14:13:00	JB
2017-07-07	C	10	21	li	n	cam	37.6	1904-01-01 14:13:00	JB
2017-07-07	C	11	51	bl	n	cam	37.6	1904-01-01 14:13:00	JB
2017-07-07	C	11	33	li	n	cam	37.6	1904-01-01 14:13:00	JB
2017-07-07	C	11	42	or	n	cam	37.6	1904-01-01 14:13:00	JB
2017-07-07	C	11	11	or	n	rclo	37.6	1904-01-01 14:13:00	JB
2017-07-07	C	11	48	bl	n	rclo	37.6	1904-01-01 14:13:00	JB
2017-07-07	C	12	6	or	n	cam	37.6	1904-01-01 14:13:00	JB
2017-07-07	C	12	30	bl	n	cam	37.6	1904-01-01 14:13:00	JB
2017-07-07	C	13	14	or	n	cam	37.6	1904-01-01 14:13:00	JB
2017-07-07	C	13	unm		n	cam	37.6	1904-01-01 14:13:00	JB
2017-07-07	C	13	45	or	n	cam	37.6	1904-01-01 14:13:00	JB
2017-07-07	C	14	47	bl	n	rclo	37.6	1904-01-01 14:13:00	JB
2017-07-07	C	14	42	or	n	cam	37.6	1904-01-01 14:13:00	JB
2017-07-07	C	14	19	li	n	cam	37.6	1904-01-01 14:13:00	JB
2017-07-07	C	15	6	or	n	cam	37.6	1904-01-01 14:13:00	JB
2017-07-07	C	15	46	or	n	cam	37.6	1904-01-01 14:13:00	JB
2017-07-07	C	15	51	bl	n	rclo	37.6	1904-01-01 14:13:00	JB
2017-07-07	C	16	46	bl	n	rclo	37.6	1904-01-01 14:13:00	JB
2017-07-07	C	16	33	li	n	rclo	37.6	1904-01-01 14:13:00	JB
2017-07-07	C	16	45	or	n	rclo	37.6	1904-01-01 14:13:00	JB
2017-07-07	C	16	11	or	n	rclo	37.6	1904-01-01 14:13:00	JB
2017-07-07	C	16	42	or	n	cam	37.6	1904-01-01 14:13:00	JB
2017-07-07	C	17	38	li	n	cam	37.6	1904-01-01 14:13:00	JB
2017-07-07	C	17	51	bl	n	cam	37.6	1904-01-01 14:13:00	JB
2017-07-07	C	18	53	bl	n	rclo	37.6	1904-01-01 14:13:00	JB
2017-07-07	C	18	46	bl	n	rclo	37.6	1904-01-01 14:13:00	JB
2017-07-07	C	18	47	bl	n	rclo	37.6	1904-01-01 14:13:00	JB
2017-07-07	C	19	45	or	n	cam	37.6	1904-01-01 14:13:00	JB
2017-07-07	C	19	38	li	n	cam	37.6	1904-01-01 14:13:00	JB
2017-07-07	C	20	51	bl	n	cam	37.6	1904-01-01 14:13:00	JB
2017-07-07	C	20	46	or	n	cam	37.6	1904-01-01 14:13:00	JB
2017-07-07	C	20	23	bl	n	cam	37.6	1904-01-01 14:13:00	JB
2017-07-07	C	20	51	bl	n	cam	37.6	1904-01-01 14:13:00	JB
2017-07-07	B	1	unm		n	cam	38.8	1904-01-01 14:46:00	JB
2017-07-07	B	1		tbl	n	cam	38.8	1904-01-01 14:46:00	JB
2017-07-07	B	1	10	y	n	rclo	38.8	1904-01-01 14:46:00	JB
2017-07-07	B	2		bl	n	cam	38.8	1904-01-01 14:46:00	JB
2017-07-07	B	2		bl	n	cam	38.8	1904-01-01 14:46:00	JB
2017-07-07	B	2	50	li	n	cam	38.8	1904-01-01 14:46:00	JB
2017-07-07	B	3	39	bl	n	wclo	38.8	1904-01-01 14:46:00	JB
2017-07-07	B	3	20	w	n	wclo	38.8	1904-01-01 14:46:00	JB
2017-07-07	B	3	36	tbl	n	cam	38.8	1904-01-01 14:46:00	JB
2017-07-07	B	4	unm		n	cam	38.8	1904-01-01 14:46:00	JB
2017-07-07	B	4	18	w	n	cam	38.8	1904-01-01 14:46:00	JB
2017-07-07	B	5	51	li	n	cam	38.8	1904-01-01 14:46:00	JB
2017-07-07	B	5		bl	n	cam	38.8	1904-01-01 14:46:00	JB
2017-07-07	B	5	24	w	n	cam	38.8	1904-01-01 14:46:00	JB
2017-07-07	B	6	20	w	n	yedai	38.8	1904-01-01 14:46:00	JB
2017-07-07	B	6		or	n	cam	38.8	1904-01-01 14:46:00	JB
2017-07-07	B	6	50	li	n	rclo	38.8	1904-01-01 14:46:00	JB
2017-07-07	B	7	18	w	n	cam	38.8	1904-01-01 14:46:00	JB
2017-07-07	B	7	20	w	n	rclo	38.8	1904-01-01 14:46:00	JB
2017-07-07	B	7	25	or	n	cam	38.8	1904-01-01 14:46:00	JB
2017-07-07	B	7	5	y	n	cam	38.8	1904-01-01 14:46:00	JB
2017-07-07	B	8	57	li	n	cam	38.8	1904-01-01 14:46:00	JB
2017-07-07	B	8	56	y	n	cam	38.8	1904-01-01 14:46:00	JB
2017-07-07	B	8		or	n	yedai	38.8	1904-01-01 14:46:00	JB
2017-07-07	B	8	39	w	n	cam	38.8	1904-01-01 14:46:00	JB
2017-07-07	B	9	30	y	n	cam	38.8	1904-01-01 14:46:00	JB
2017-07-07	B	10		bl	n	cam	38.8	1904-01-01 14:46:00	JB
2017-07-07	B	10		tbl	n	cam	38.8	1904-01-01 14:46:00	JB
2017-07-07	B	10		or	n	cam	38.8	1904-01-01 14:46:00	JB
2017-07-07	B	11	11	w	n	cam	38.8	1904-01-01 14:46:00	JB
2017-07-07	B	11	39	bl	n	rclo	38.8	1904-01-01 14:46:00	JB
2017-07-07	B	11	57	bl	n	cam	38.8	1904-01-01 14:46:00	JB
2017-07-07	B	12	30	y	n	cam	38.8	1904-01-01 14:46:00	JB
2017-07-07	B	12	39	w	n	cam	38.8	1904-01-01 14:46:00	JB
2017-07-07	B	12	46	bl	n	cam	38.8	1904-01-01 14:46:00	JB
2017-07-07	B	13	39	bl	n	wclo	38.8	1904-01-01 14:46:00	JB
2017-07-07	B	14	50	li	n	cam	38.8	1904-01-01 14:46:00	JB
2017-07-07	B	14		tbl	n	cam	38.8	1904-01-01 14:46:00	JB
2017-07-07	B	14	64	w	n	cam	38.8	1904-01-01 14:46:00	JB
2017-07-07	B	15		bl	n	cam	38.8	1904-01-01 14:46:00	JB
2017-07-07	B	15		or	n	cam	38.8	1904-01-01 14:46:00	JB
2017-07-07	B	15	39	y	n	cam	38.8	1904-01-01 14:46:00	JB
2017-07-07	B	16	39	bl	n	cam	38.8	1904-01-01 14:46:00	JB
2017-07-07	B	16	41	li	n	cam	38.8	1904-01-01 14:46:00	JB
2017-07-07	B	17		tbl	n	cam	38.8	1904-01-01 14:46:00	JB
2017-07-07	B	17	49	w	n	cam	38.8	1904-01-01 14:46:00	JB
2017-07-07	B	17	18	w	n	cam	38.8	1904-01-01 14:46:00	JB
2017-07-07	B	18		tbl	n	cam	38.8	1904-01-01 14:46:00	JB
2017-07-07	B	18	46	w	n	cam	38.8	1904-01-01 14:46:00	JB
2017-07-07	B	19	18	w	n	cam	38.8	1904-01-01 14:46:00	JB
2017-07-07	B	19	50	li	n	cam	38.8	1904-01-01 14:46:00	JB
2017-07-07	B	20	51	li	n	rclo	38.8	1904-01-01 14:46:00	JB
2017-07-07	B	20	46	y	n	cam	38.8	1904-01-01 14:46:00	JB
2017-07-07	B	20	39	w	n	cam	38.8	1904-01-01 14:46:00	JB
2017-07-07	B	20	5	y	n	cam	38.8	1904-01-01 14:46:00	JB
2017-07-07	A	1		or	n	cam	41.4	1904-01-01 15:14:00	JB
2017-07-07	A	1	30	or	n	cam	41.4	1904-01-01 15:14:00	JB
2017-07-07	A	2	59	or	n	cam	41.4	1904-01-01 15:14:00	JB
2017-07-07	A	2	52	or	n	cam	41.4	1904-01-01 15:14:00	JB
2017-07-07	A	3	30	or	n	cam	41.4	1904-01-01 15:14:00	JB
2017-07-07	A	3	39	ty	n	cam	41.4	1904-01-01 15:14:00	JB
2017-07-07	A	3		w	n	wclo	41.4	1904-01-01 15:14:00	JB
2017-07-07	A	3	66	or	n	cam	41.4	1904-01-01 15:14:00	JB
2017-07-07	A	4	46	or	n	cam	41.4	1904-01-01 15:14:00	JB
2017-07-07	A	4		ty	n	cam	41.4	1904-01-01 15:14:00	JB
2017-07-07	A	5	39	ty	n	cam	41.4	1904-01-01 15:14:00	JB
2017-07-07	A	5	17	w	n	cam	41.4	1904-01-01 15:14:00	JB
2017-07-07	A	6	54	or	n	kw	41.4	1904-01-01 15:14:00	JB
2017-07-07	A	6	30	or	n	cam	41.4	1904-01-01 15:14:00	JB
2017-07-07	A	7	56	or	n	rclo	41.4	1904-01-01 15:14:00	JB
2017-07-07	A	7	66	or	n	rclo	41.4	1904-01-01 15:14:00	JB
2017-07-07	A	8		ty	n	cam	41.4	1904-01-01 15:14:00	JB
2017-07-07	A	8	46	or	n	cam	41.4	1904-01-01 15:14:00	JB
2017-07-07	A	8	54	or	n	cam	41.4	1904-01-01 15:14:00	JB
2017-07-07	A	9		ty	n	cam	41.4	1904-01-01 15:14:00	JB
2017-07-07	A	9		ty	n	cam	41.4	1904-01-01 15:14:00	JB
2017-07-07	A	9	47	ty	n	cam	41.4	1904-01-01 15:14:00	JB
2017-07-07	A	10	22	w	n	cam	41.4	1904-01-01 15:14:00	JB
2017-07-07	A	10	57	or	n	leg1	41.4	1904-01-01 15:14:00	JB
2017-07-07	A	11	54	or	n	cam	41.4	1904-01-01 15:14:00	JB
2017-07-07	A	11	66	or	n	cam	41.4	1904-01-01 15:14:00	JB
2017-07-07	A	11	59	or	n	cam	41.4	1904-01-01 15:14:00	JB
2017-07-07	A	12	51	or	n	cam	41.4	1904-01-01 15:14:00	JB
2017-07-07	A	12		w	n	kw	41.4	1904-01-01 15:14:00	JB
2017-07-07	A	13		w	n	rclo	41.4	1904-01-01 15:14:00	JB
2017-07-07	A	13	39	ty	n	cam	41.4	1904-01-01 15:14:00	JB
2017-07-07	A	14	59	or	n	wclo	41.4	1904-01-01 15:14:00	JB
2017-07-07	A	14	17	w	n	rclo	41.4	1904-01-01 15:14:00	JB
2017-07-07	A	15	54	or	n	cam	41.4	1904-01-01 15:14:00	JB
2017-07-07	A	15	66	or	n	cam	41.4	1904-01-01 15:14:00	JB
2017-07-07	A	15	38	ty	n	cam	41.4	1904-01-01 15:14:00	JB
2017-07-07	A	16	47	ty	n	cam	41.4	1904-01-01 15:14:00	JB
2017-07-07	A	17	30	or	n	cam	41.4	1904-01-01 15:14:00	JB
2017-07-07	A	17	12	w	n	cam	41.4	1904-01-01 15:14:00	JB
2017-07-07	A	17	66	or	n	cam	41.4	1904-01-01 15:14:00	JB
2017-07-07	A	17	46	or	n	cam	41.4	1904-01-01 15:14:00	JB
2017-07-07	A	18	54	or	n	cam	41.4	1904-01-01 15:14:00	JB
2017-07-07	A	18	66	or	n	cam	41.4	1904-01-01 15:14:00	JB
2017-07-07	A	19	46	or	n	cam	41.4	1904-01-01 15:14:00	JB
2017-07-07	A	19	59	or	n	cam	41.4	1904-01-01 15:14:00	JB
2017-07-07	A	20	54	or	n	cam	41.4	1904-01-01 15:14:00	JB
2017-07-07	A	20	57	or	n	cam	41.4	1904-01-01 15:14:00	JB
2017-07-07	F	0	29	ty	n	cam	38	1904-01-01 14:10:00	EB
2017-07-07	F	0	48	w	n	cam	38	1904-01-01 14:10:00	EB
2017-07-07	F	1	12	li	n	rclo	38	1904-01-01 14:10:00	EB
2017-07-07	F	1	8	li	n	wclo	38	1904-01-01 14:10:00	EB
2017-07-07	F	1		li	n	wclo	38	1904-01-01 14:10:00	EB
2017-07-07	F	2	30	li	n	td	38	1904-01-01 14:10:00	EB
2017-07-07	F	2	8	li	n	leg1	38	1904-01-01 14:10:00	EB
2017-07-07	F	3	64	li	n	td	38	1904-01-01 14:10:00	EB
2017-07-07	F	4	29	ty	n	td	38	1904-01-01 14:10:00	EB
2017-07-07	F	4	64	w	n	td	38	1904-01-01 14:10:00	EB
2017-07-07	F	4	8	li	n	td	38	1904-01-01 14:10:00	EB
2017-07-07	F	4	39	bl	n	td	38	1904-01-01 14:10:00	EB
2017-07-07	F	6	12	li	n	leg1	38	1904-01-01 14:10:00	EB
2017-07-07	F	6	6	or	n	cam	38	1904-01-01 14:10:00	EB
2017-07-07	F	7	48	w	n	cam	38	1904-01-01 14:10:00	EB
2017-07-07	F	7	64	li	n	cam	38	1904-01-01 14:10:00	EB
2017-07-07	F	7	12	li	n	rclo	38	1904-01-01 14:10:00	EB
2017-07-07	F	7	67	w	n	td	38	1904-01-01 14:10:00	EB
2017-07-07	F	8	55	li	n	cam	38	1904-01-01 14:10:00	EB
2017-07-07	F	9	48	w	n	cam	38	1904-01-01 14:10:00	EB
2017-07-07	F	9	2	bl	n	cam	38	1904-01-01 14:10:00	EB
2017-07-07	F	9	8	li	n	cam	38	1904-01-01 14:10:00	EB
2017-07-07	F	10	64	w	n	cam	38	1904-01-01 14:10:00	EB
2017-07-07	F	10	39	bl	n	cam	38	1904-01-01 14:10:00	EB
2017-07-07	F	10		ty	n	cam	38	1904-01-01 14:10:00	EB
2017-07-07	F	11	30	li	n	cam	38	1904-01-01 14:10:00	EB
2017-07-07	F	11	27	w	n	rclo	38	1904-01-01 14:10:00	EB
2017-07-07	F	12	12	li	n	td	38	1904-01-01 14:10:00	EB
2017-07-07	F	12	um		n	cam	38	1904-01-01 14:10:00	EB
2017-07-07	F	12	55	li	n	cam	38	1904-01-01 14:10:00	EB
2017-07-07	F	13	6	or	n	wclo	38	1904-01-01 14:10:00	EB
2017-07-07	F	13	12	li	n	rclo	38	1904-01-01 14:10:00	EB
2017-07-07	F	13	12A	li	n	td	38	1904-01-01 14:10:00	EB
2017-07-07	F	14	30	li	n	cam	38	1904-01-01 14:10:00	EB
2017-07-07	F	14	38	w	n	cam	38	1904-01-01 14:10:00	EB
2017-07-07	F	15	24	y	n	rclo	38	1904-01-01 14:10:00	EB
2017-07-07	F	15	2	bl	n	cam	38	1904-01-01 14:10:00	EB
2017-07-07	F	15	30	li	n	cam	38	1904-01-01 14:10:00	EB
2017-07-07	F	15	9	li	n	cam	38	1904-01-01 14:10:00	EB
2017-07-07	F	15	39	bl	n	cam	38	1904-01-01 14:10:00	EB
2017-07-07	F	16	64	w	n	cam	38	1904-01-01 14:10:00	EB
2017-07-07	F	16	54	w	n	rclo	38	1904-01-01 14:10:00	EB
2017-07-07	F	16	29	ty	n	cam	38	1904-01-01 14:10:00	EB
2017-07-07	F	16	2	bl	n	cam	38	1904-01-01 14:10:00	EB
2017-07-07	F	16	61	w	n	cam	38	1904-01-01 14:10:00	EB
2017-07-07	F	17	12	li	n	rclo	38	1904-01-01 14:10:00	EB
2017-07-07	F	18	8	li	n	leg1	38	1904-01-01 14:10:00	EB
2017-07-07	F	19	31	w	n	cam	38	1904-01-01 14:10:00	EB
2017-07-07	F	19	55	li	n	cam	38	1904-01-01 14:10:00	EB
2017-07-07	F	19	61	w	n	cam	38	1904-01-01 14:10:00	EB
2017-07-07	F	19	55	li	n	cam	38	1904-01-01 14:10:00	EB
2017-07-07	F	19	39	bl	n	cam	38	1904-01-01 14:10:00	EB
2017-07-07	F	19	54	li	n	cam	38	1904-01-01 14:10:00	EB
2017-07-07	D	0	39	or	n	cam	38.5	1904-01-01 14:47:00	EB
2017-07-07	D	0	13	w	n	cam	38.5	1904-01-01 14:47:00	EB
2017-07-07	D	0	51	tg	n	cam	38.5	1904-01-01 14:47:00	EB
2017-07-07	D	1	4	w	n	cam	38.5	1904-01-01 14:47:00	EB
2017-07-07	D	1	58	or	n	cam	38.5	1904-01-01 14:47:00	EB
2017-07-07	D	1		tg	n	cam	38.5	1904-01-01 14:47:00	EB
2017-07-07	D	2	56	or	n	rclo	38.5	1904-01-01 14:47:00	EB
2017-07-07	D	2	26	or	n	rclo	38.5	1904-01-01 14:47:00	EB
2017-07-07	D	3		tg	n	rclo	38.5	1904-01-01 14:47:00	EB
2017-07-07	D	3	56	tg	n	cam	38.5	1904-01-01 14:47:00	EB
2017-07-07	D	3	13	w	n	rclo	38.5	1904-01-01 14:47:00	EB
2017-07-07	D	4	65	tg	n	rclo	38.5	1904-01-01 14:47:00	EB
2017-07-07	D	4	19	tg	n	rclo	38.5	1904-01-01 14:47:00	EB
2017-07-07	D	4	60	or		rclo	38.5	1904-01-01 14:47:00	EB
2017-07-07	D	5	38	y	n	rclo	38.5	1904-01-01 14:47:00	EB
2017-07-07	D	6	39	tg	n	rclo	38.5	1904-01-01 14:47:00	EB
2017-07-07	D	7		tg	p	td	38.5	1904-01-01 14:47:00	EB
2017-07-07	D	7	46	or	n	rclo	38.5	1904-01-01 14:47:00	EB
2017-07-07	D	8	74	tg	n	cam	38.5	1904-01-01 14:47:00	EB
2017-07-07	D	8	32	w	n	cam	38.5	1904-01-01 14:47:00	EB
2017-07-07	D	8	2	li	n	cam	38.5	1904-01-01 14:47:00	EB
2017-07-07	D	8	4	w	n	cam	38.5	1904-01-01 14:47:00	EB
2017-07-07	D	8	32	y	n	cam	38.5	1904-01-01 14:47:00	EB
2017-07-07	D	9	51	tg	n	cam	38.5	1904-01-01 14:47:00	EB
2017-07-07	D	9		tg	n	cam	38.5	1904-01-01 14:47:00	EB
2017-07-07	D	10	4	w	n	wclo	38.5	1904-01-01 14:47:00	EB
2017-07-07	D	10	24	y	n	td	38.5	1904-01-01 14:47:00	EB
2017-07-07	D	11	ft	tg	n	cam	38.5	1904-01-01 14:47:00	EB
2017-07-07	D	12	1	tg	n	leg1	38.5	1904-01-01 14:47:00	EB
2017-07-07	D	12	32	tg	n	rclo	38.5	1904-01-01 14:47:00	EB
2017-07-07	D	13	51	tg	n	cam	38.5	1904-01-01 14:47:00	EB
2017-07-07	D	13	3	w	n	cam	38.5	1904-01-01 14:47:00	EB
2017-07-07	D	13	7	tg	n	cam	38.5	1904-01-01 14:47:00	EB
2017-07-07	D	14	41	or	n	cam	38.5	1904-01-01 14:47:00	EB
2017-07-07	D	14	4	w	n	wclo	38.5	1904-01-01 14:47:00	EB
2017-07-07	D	14	22	w	n	cam	38.5	1904-01-01 14:47:00	EB
2017-07-07	D	14	49	tg	n	cam	38.5	1904-01-01 14:47:00	EB
2017-07-07	D	14	wo	tg	n	rclo	38.5	1904-01-01 14:47:00	EB
2017-07-07	D	15	39	or	p	td	38.5	1904-01-01 14:47:00	EB
2017-07-07	D	15	4	w	n	cam	38.5	1904-01-01 14:47:00	EB
2017-07-07	D	15	61	tg	n	cam	38.5	1904-01-01 14:47:00	EB
2017-07-07	D	15	61	tg	n	cam	38.5	1904-01-01 14:47:00	EB
2017-07-07	D	16	54	tg	n	cam	38.5	1904-01-01 14:47:00	EB
2017-07-07	D	16	2	li	n	cam	38.5	1904-01-01 14:47:00	EB
2017-07-07	D	16	73	tg	n	cam	38.5	1904-01-01 14:47:00	EB
2017-07-07	D	17	41	or	n	cam	38.5	1904-01-01 14:47:00	EB
2017-07-07	D	17	49	tg	n	cam	38.5	1904-01-01 14:47:00	EB
2017-07-07	D	18	39	tg	p	rclo	38.5	1904-01-01 14:47:00	EB
2017-07-07	D	18	22	w	n	cam	38.5	1904-01-01 14:47:00	EB
2017-07-07	D	19	52	w	n	cam	38.5	1904-01-01 14:47:00	EB
2017-07-07	D	19	4	w	n	cam	38.5	1904-01-01 14:47:00	EB
2017-07-07	D	19	41	w	n	cam	38.5	1904-01-01 14:47:00	EB
2017-07-07	D	19	wo	tg	n	cam	38.5	1904-01-01 14:47:00	EB
2017-07-07	D	19	51	tg	n	cam	38.5	1904-01-01 14:47:00	EB
2017-07-07	D	19	74	tg	n	cam	38.5	1904-01-01 14:47:00	EB
2017-07-07	D	19	2	li	n	cam	38.5	1904-01-01 14:47:00	EB
2017-07-07	D	19	68	or	n	rclo	38.5	1904-01-01 14:47:00	EB
2017-07-07	D	19	39	or	n	rclo	38.5	1904-01-01 14:47:00	EB
2017-07-07	E	1	51	y	n	cam	41	1904-01-01 15:20:00	EB
2017-07-07	E	1	22	y	n	cam	41	1904-01-01 15:20:00	EB
2017-07-07	E	1	59	y	n	cam	41	1904-01-01 15:20:00	EB
2017-07-07	E	2	28	bl	n	cam	41	1904-01-01 15:20:00	EB
2017-07-07	E	2	64	y	n	cam	41	1904-01-01 15:20:00	EB
2017-07-07	E	3	23	or	n	rclo	41	1904-01-01 15:20:00	EB
2017-07-07	E	3	WO	tbl	n	rclo	41	1904-01-01 15:20:00	EB
2017-07-07	E	4	65	y	n	cam	41	1904-01-01 15:20:00	EB
2017-07-07	E	5	51	y	n	cam	41	1904-01-01 15:20:00	EB
2017-07-07	E	5	65	y	n	cam	41	1904-01-01 15:20:00	EB
2017-07-07	E	5	66	y	n	cam	41	1904-01-01 15:20:00	EB
2017-07-07	E	5	22	bl	n	cam	41	1904-01-01 15:20:00	EB
2017-07-07	E	6	64	y	n	cam	41	1904-01-01 15:20:00	EB
2017-07-07	E	6	51	y	n	rclo	41	1904-01-01 15:20:00	EB
2017-07-07	E	7	28	bl	n	cam	41	1904-01-01 15:20:00	EB
2017-07-07	E	7	66	y	n	cam	41	1904-01-01 15:20:00	EB
2017-07-07	E	7	64	y	n	cam	41	1904-01-01 15:20:00	EB
2017-07-07	E	8	22	or	n	cam	41	1904-01-01 15:20:00	EB
2017-07-07	E	8	42	bl	p	cam	41	1904-01-01 15:20:00	EB
2017-07-07	E	9	41	bl	n	cam	41	1904-01-01 15:20:00	EB
2017-07-07	E	9	64	y	n	cam	41	1904-01-01 15:20:00	EB
2017-07-07	E	9		um (LT)	n	rclo	41	1904-01-01 15:20:00	EB
2017-07-07	E	9	59	y	n	cam	41	1904-01-01 15:20:00	EB
2017-07-07	E	9	51	y	n	cam	41	1904-01-01 15:20:00	EB
2017-07-07	E	10	56	y	n	cam	41	1904-01-01 15:20:00	EB
2017-07-07	E	10	12	bl	n	cam	41	1904-01-01 15:20:00	EB
2017-07-07	E	10	66	y	n	cam	41	1904-01-01 15:20:00	EB
2017-07-07	E	11	11	bl	n	cam	41	1904-01-01 15:20:00	EB
2017-07-07	E	11	32	bl	n	cam	41	1904-01-01 15:20:00	EB
2017-07-07	E	11		y	n	cam	41	1904-01-01 15:20:00	EB
2017-07-07	E	11	66	y	n	cam	41	1904-01-01 15:20:00	EB
2017-07-07	E	12		bl	n	cam	41	1904-01-01 15:20:00	EB
2017-07-07	E	12	63	y	n	cam	41	1904-01-01 15:20:00	EB
2017-07-07	E	13	41	bl	n	cam	41	1904-01-01 15:20:00	EB
2017-07-07	E	13	59	y	n	cam	41	1904-01-01 15:20:00	EB
2017-07-07	E	14	11	bl	n	cam	41	1904-01-01 15:20:00	EB
2017-07-07	E	15	23	or	n	cam	41	1904-01-01 15:20:00	EB
2017-07-07	E	15	28	bl	n	cam	41	1904-01-01 15:20:00	EB
2017-07-07	E	15	20	y	n	wclo	41	1904-01-01 15:20:00	EB
2017-07-07	E	16	68	y	p	td	41	1904-01-01 15:20:00	EB
2017-07-07	E	16	64	y	n	cam	41	1904-01-01 15:20:00	EB
2017-07-07	E	16	23	or	n	cam	41	1904-01-01 15:20:00	EB
2017-07-07	E	16	66	y	n	cam	41	1904-01-01 15:20:00	EB
2017-07-07	E	17	22	or	n	cam	41	1904-01-01 15:20:00	EB
2017-07-07	E	18	64	y	n	cam	41	1904-01-01 15:20:00	EB
2017-07-07	E	18	11	bl	n	cam	41	1904-01-01 15:20:00	EB
2017-07-07	E	18		um (LT)	n	cam	41	1904-01-01 15:20:00	EB
2017-07-07	E	19	41	bl	p	cam	41	1904-01-01 15:20:00	EB
2017-07-07	E	19	32	bl	n	cam	41	1904-01-01 15:20:00	EB

## Sheet: Bailesetal_datafile4_ESM.csv
Colony	Compartment	DateInf	TimeToInf	num_scr	num_inf	prop_inf	event	Density	Treat	AvInCol	nAvInCol	AvInComp	nAvInComp	AvBees	AverageFlowers	FlwPBee	beesFROMany	beesFROMcrit	beesTOcrit	beesTOany	drift2way	avINcrit	avINany	avFROMany	avFROMcrit	totDrift	totCrit	crit2way	nFlwPBee	nbeesFROMany	nbeesFROMcrit	nbeesTOcrit	nbeesTOany	ndrift2way	navINcrit	navINany	navFROMany	navFROMcrit	ntotDrift	ntotCrit	ncrit2way
20	A	2017-06-17	6	5	4	0.8	1	Low	UNinoc	19	1.45485	19.625	1.09217	50.375	19634.7	389.771	0.571429	0.571429	0.571429	0.714286	1.28571	0.0257143	0.0314286	0.0271429	0.0271429	0.0292857	0.0264286	1.14286	0.664669	-0.89579	-0.0413626	0.362062	-0.776322	-1.13091	0.0109109	-1.00616	-1.038	-0.338032	-1.36581	-0.203934	0.219586
8	A	2017-06-17	6	4	2	0.5	1	Low	SBPV	12.25	-0.435677	12.25	-0.819731	50.375	19634.7	389.771	1.28571	1.14286	0	0	1.28571	0	0	0.0942857	0.0757143	0.0471429	0.0378571	1.14286	0.664669	-0.485056	1.11679	-0.686669	-1.23947	-1.13091	-0.676475	-1.33867	-0.385449	1.0986	-1.12421	0.21904	0.219586
12	B	2017-06-19	8	4	2	0.5	1	High	UNinoc	10.875	-0.820784	10.375	-1.30581	86.125	15842	183.942	7.57143	0.857143	0	0.714286	8.28571	0	0.06	0.408571	0.0442857	0.234286	0.0221429	0.857143	-0.810446	3.1294	0.537714	-0.686669	-0.776322	1.74244	-0.676475	-0.70388	2.66905	0.169016	1.40768	-0.362549	-0.13513
37	B	2017-06-19	8	4	1	0.25	1	High	UNinoc	11.5	-0.645735	12.875	-0.657705	86.125	15842	183.942	0.571429	0.142857	0	1.57143	2.14286	0	0.125714	0.0457143	0.00857143	0.0857143	0.00428571	0.142857	-0.810446	-0.89579	-0.909977	-0.686669	-0.220546	-0.779071	-0.676475	-0.00863657	-0.857507	-0.887333	-0.602373	-1.02344	-1.02192
4	B	2017-06-19	8	4	3	0.75	1	High	UNinoc	12.25	-0.435677	16.875	0.379261	86.125	15842	183.942	3.85714	1.57143	2	5.28571	9.14286	0.12	0.311429	0.241429	0.0985714	0.276429	0.109286	3.57143	-0.810446	0.993583	1.9854	2.98389	2.18782	2.09428	2.53133	1.95618	1.04461	1.77467	1.97785	2.86262	3.23468
32	B	2017-06-21	10	4	2	0.5	1	High	SBPV	10.375	-0.960823	13.375	-0.528085	86.125	15842	183.942	0.142857	0	0.857143	3.42857	3.57143	0.0714286	0.27	0.0185714	0	0.144286	0.0357143	0.857143	-0.810446	-1.14223	-1.19952	0.886427	0.983635	-0.192673	1.23293	1.51788	-1.1213	-1.14086	0.190054	0.139732	-0.13513
5	B	2017-06-23	12	3	1	0.333333	1	High	UNinoc	11.875	-0.540706	16.25	0.217235	86.125	15842	183.942	3.71429	0.571429	0.428571	5	8.71429	0.0242857	0.307143	0.245714	0.0357143	0.276429	0.03	1	-0.810446	0.911437	-0.0413626	0.0998791	2.00256	1.91836	-0.0272772	1.91084	1.08626	-0.0845079	1.97785	-0.0717544	0.0422282
10	C	2017-06-19	8	4	3	0.75	1	Low	UNinoc	16.5	0.754655	16.625	0.31445	53.75	27154.5	505.201	2.14286	0.285714	0.142857	0.142857	2.28571	0.0114286	0.0114286	0.105714	0.0142857	0.0585714	0.0128571	0.428571	1.49191	0.00782349	-0.620439	-0.424486	-1.14684	-0.720431	-0.37097	-1.21776	-0.274376	-0.718317	-0.969595	-0.706215	-0.667205
11	C	2017-06-23	12	4	3	0.75	1	Low	SBPV	18.875	1.41984	20.75	1.38382	53.75	27154.5	505.201	0.857143	0.857143	0.285714	2.14286	3	0.0157143	0.0985714	0.0428571	0.0428571	0.0707143	0.0292857	1.14286	1.49191	-0.731496	0.537714	-0.162304	0.149971	-0.427232	-0.256406	-0.295802	-0.885275	0.126762	-0.805311	-0.0981903	0.219586
13	D	2017-06-17	6	4	1	0.25	1	High	UNinoc	10.375	-0.960823	13	-0.6253	107.25	18997.8	177.136	2.28571	0.428571	0.142857	3	5.28571	0.00857143	0.248571	0.195714	0.04	0.222143	0.0242857	0.571429	-0.859224	0.0899701	-0.330901	-0.424486	0.705747	0.511004	-0.447347	1.29117	0.600321	0.0422539	1.2434	-0.283241	-0.489847
14	D	2017-06-17	6	3	1	0.333333	1	High	UNinoc	11.625	-0.610726	12.625	-0.722516	107.25	18997.8	177.136	3.57143	0.142857	0	1.14286	4.71429	0	0.102857	0.251429	0.00857143	0.177143	0.00428571	0.142857	-0.859224	0.82929	-0.909977	-0.686669	-0.498434	0.276445	-0.676475	-0.25046	1.1418	-0.887333	0.634585	-1.02344	-1.02192
15	D	2017-06-17	6	5	1	0.2	1	High	UNinoc	22.25	2.3651	26.125	2.77724	107.25	18997.8	177.136	3.14286	0.142857	0	4.42857	7.57143	0	0.16	0.108571	0.00571429	0.134286	0.00285714	0.142857	-0.859224	0.58285	-0.909977	-0.686669	1.63204	1.44924	-0.676475	0.354099	-0.246608	-0.971841	0.0547612	-1.07632	-1.02192
16	D	2017-06-19	8	4	2	0.5	1	High	UNinoc	12.625	-0.330648	14.375	-0.268843	107.25	18997.8	177.136	2	0.285714	0	2	4	0	0.145714	0.15	0.0242857	0.147857	0.0121429	0.285714	-0.859224	-0.0743232	-0.620439	-0.686669	0.0573419	-0.0167542	-0.676475	0.202959	0.156031	-0.422539	0.238372	-0.732651	-0.844563
30	D	2017-06-19	8	5	1	0.2	1	High	SBPV	18.125	1.20978	19.5	1.05977	107.25	18997.8	177.136	2	0	0	1.57143	3.57143	0	0.0785714	0.0957143	0	0.0871429	0	0	-0.859224	-0.0743232	-1.19952	-0.686669	-0.220546	-0.192673	-0.676475	-0.507398	-0.371564	-1.14086	-0.583046	-1.18206	-1.19928
19	E	2017-06-23	12	4	4	1	1	Low	UNinoc	16.375	0.719645	17.25	0.476476	41.5	23679	570.578	0.285714	0.285714	0.714286	1	1.28571	0.0371429	0.0542857	0.0185714	0.0185714	0.0364286	0.0278571	1	1.96045	-1.06008	-0.620439	0.624245	-0.591063	-1.13091	0.316416	-0.764336	-1.1213	-0.591555	-1.26917	-0.151062	0.0422282
35	E	2017-06-25	14	4	1	0.25	1	Low	SBPV	11.75	-0.575716	13.125	-0.592895	41.5	23679	570.578	0.428571	0.142857	1.57143	1.57143	2	0.125714	0.125714	0.0357143	0.0114286	0.0807143	0.0685714	1.71429	1.96045	-0.977936	-0.909977	2.19734	-0.220546	-0.837711	2.68408	-0.00863657	-0.954696	-0.802825	-0.670019	1.35578	0.92902
17	F	2017-06-17	6	4	1	0.25	1	High	UNinoc	10.875	-0.820784	13	-0.6253	77.125	23154.2	300.216	0.571429	0.285714	0	2.42857	3	0	0.192857	0.0514286	0.0271429	0.122143	0.0135714	0.285714	0.022855	-0.89579	-0.620439	-0.686669	0.33523	-0.427232	-0.676475	0.701721	-0.801971	-0.338032	-0.109522	-0.679779	-0.844563
26	F	2017-06-19	8	4	1	0.25	1	High	UNinoc	12	-0.505696	12.125	-0.852137	77.125	23154.2	300.216	1.42857	0.857143	0.571429	1.85714	3.28571	0.0414286	0.142857	0.0942857	0.0557143	0.118571	0.0485714	1.42857	0.022855	-0.40291	0.537714	0.362062	-0.0352873	-0.309953	0.43098	0.172731	-0.385449	0.507047	-0.157841	0.615578	0.574303
23	F	2017-06-23	12	4	2	0.5	1	High	UNinoc	10.375	-0.960823	11.625	-0.981757	77.125	23154.2	300.216	2.42857	1.28571	0.428571	1.42857	3.85714	0.0314286	0.13	0.194286	0.104286	0.162143	0.0678571	1.71429	0.022855	0.172117	1.40633	0.0998791	-0.313175	-0.075394	0.163663	0.0367054	0.586437	1.94368	0.431647	1.32935	0.92902
24	F	2017-06-23	12	4	3	0.75	1	High	SBPV	14.25	0.124479	14.625	-0.204033	77.125	23154.2	300.216	2.42857	1.14286	0	0.428571	2.85714	0	0.03	0.134286	0.06	0.0821429	0.03	1.14286	0.022855	0.172117	1.11679	-0.686669	-0.96158	-0.485872	-0.676475	-1.02127	0.00330573	0.633809	-0.650692	-0.0717544	0.219586
3	F	2017-06-23	10	3	1	0.333333	1	High	UNinoc	9.25	-1.27591	9.5	-1.53265	77.125	23154.2	300.216	3.42857	1.42857	0.142857	0.285714	3.71429	0.0185714	0.03	0.252857	0.107143	0.141429	0.0628571	1.57143	0.022855	0.747143	1.69587	-0.424486	-1.05421	-0.134034	-0.18003	-1.02127	1.15568	2.02819	0.151399	1.14429	0.751661

## Sheet: Bailesetal_datafile5_ESM.csv
Colony	Compartment	DateInf	TimeToInf	event	Density	Treat	FlwPBee	beesFROMany	beesFROMcrit	beesTOcrit	beesTOany	drift2way	avINcrit	avINany	avFROMany	avFROMcrit	totDrift	totCrit	crit2way	nFlwPBee	nbeesFROMany	nbeesFROMcrit	nbeesTOcrit	nbeesTOany	ndrift2way	navINcrit	navINany	navFROMany	navFROMcrit	ntotDrift	ntotCrit	ncrit2way
10	C	2017-06-19	8	1	Low	UNinoc	505.201	2.14286	0.285714	0.142857	0.142857	2.28571	0.0114286	0.0114286	0.105714	0.0142857	0.0585714	0.0128571	0.428571	1.49191	0.00782349	-0.620439	-0.424486	-1.14684	-0.720431	-0.37097	-1.21776	-0.274376	-0.718317	-0.969595	-0.706215	-0.667205
11	C	2017-06-23	12	1	Low	SBPV	505.201	0.857143	0.857143	0.285714	2.14286	3	0.0157143	0.0985714	0.0428571	0.0428571	0.0707143	0.0292857	1.14286	1.49191	-0.731496	0.537714	-0.162304	0.149971	-0.427232	-0.256406	-0.295802	-0.885275	0.126762	-0.805311	-0.0981903	0.219586
12	B	2017-06-19	8	1	High	UNinoc	183.942	7.57143	0.857143	0	0.714286	8.28571	0	0.06	0.408571	0.0442857	0.234286	0.0221429	0.857143	-0.810446	3.1294	0.537714	-0.686669	-0.776322	1.74244	-0.676475	-0.70388	2.66905	0.169016	1.40768	-0.362549	-0.13513
13	D	2017-06-17	6	1	High	UNinoc	177.136	2.28571	0.428571	0.142857	3	5.28571	0.00857143	0.248571	0.195714	0.04	0.222143	0.0242857	0.571429	-0.859224	0.0899701	-0.330901	-0.424486	0.705747	0.511004	-0.447347	1.29117	0.600321	0.0422539	1.2434	-0.283241	-0.489847
14	D	2017-06-17	6	1	High	UNinoc	177.136	3.57143	0.142857	0	1.14286	4.71429	0	0.102857	0.251429	0.00857143	0.177143	0.00428571	0.142857	-0.859224	0.82929	-0.909977	-0.686669	-0.498434	0.276445	-0.676475	-0.25046	1.1418	-0.887333	0.634585	-1.02344	-1.02192
15	D	2017-06-17	6	1	High	UNinoc	177.136	3.14286	0.142857	0	4.42857	7.57143	0	0.16	0.108571	0.00571429	0.134286	0.00285714	0.142857	-0.859224	0.58285	-0.909977	-0.686669	1.63204	1.44924	-0.676475	0.354099	-0.246608	-0.971841	0.0547612	-1.07632	-1.02192
16	D	2017-06-19	8	1	High	UNinoc	177.136	2	0.285714	0	2	4	0	0.145714	0.15	0.0242857	0.147857	0.0121429	0.285714	-0.859224	-0.0743232	-0.620439	-0.686669	0.0573419	-0.0167542	-0.676475	0.202959	0.156031	-0.422539	0.238372	-0.732651	-0.844563
17	F	2017-06-17	6	1	High	UNinoc	300.216	0.571429	0.285714	0	2.42857	3	0	0.192857	0.0514286	0.0271429	0.122143	0.0135714	0.285714	0.022855	-0.89579	-0.620439	-0.686669	0.33523	-0.427232	-0.676475	0.701721	-0.801971	-0.338032	-0.109522	-0.679779	-0.844563
19	E	2017-06-23	12	1	Low	UNinoc	570.578	0.285714	0.285714	0.714286	1	1.28571	0.0371429	0.0542857	0.0185714	0.0185714	0.0364286	0.0278571	1	1.96045	-1.06008	-0.620439	0.624245	-0.591063	-1.13091	0.316416	-0.764336	-1.1213	-0.591555	-1.26917	-0.151062	0.0422282
20	A	2017-06-17	6	1	Low	UNinoc	389.771	0.571429	0.571429	0.571429	0.714286	1.28571	0.0257143	0.0314286	0.0271429	0.0271429	0.0292857	0.0264286	1.14286	0.664669	-0.89579	-0.0413626	0.362062	-0.776322	-1.13091	0.0109109	-1.00616	-1.038	-0.338032	-1.36581	-0.203934	0.219586
23	F	2017-06-23	12	1	High	UNinoc	300.216	2.42857	1.28571	0.428571	1.42857	3.85714	0.0314286	0.13	0.194286	0.104286	0.162143	0.0678571	1.71429	0.022855	0.172117	1.40633	0.0998791	-0.313175	-0.075394	0.163663	0.0367054	0.586437	1.94368	0.431647	1.32935	0.92902
24	F	2017-06-23	12	1	High	SBPV	300.216	2.42857	1.14286	0	0.428571	2.85714	0	0.03	0.134286	0.06	0.0821429	0.03	1.14286	0.022855	0.172117	1.11679	-0.686669	-0.96158	-0.485872	-0.676475	-1.02127	0.00330573	0.633809	-0.650692	-0.0717544	0.219586
26	F	2017-06-19	8	1	High	UNinoc	300.216	1.42857	0.857143	0.571429	1.85714	3.28571	0.0414286	0.142857	0.0942857	0.0557143	0.118571	0.0485714	1.42857	0.022855	-0.40291	0.537714	0.362062	-0.0352873	-0.309953	0.43098	0.172731	-0.385449	0.507047	-0.157841	0.615578	0.574303
3	F	2017-06-23	12	1	High	UNinoc	300.216	3.42857	1.42857	0.142857	0.285714	3.71429	0.0185714	0.03	0.252857	0.107143	0.141429	0.0628571	1.57143	0.022855	0.747143	1.69587	-0.424486	-1.05421	-0.134034	-0.18003	-1.02127	1.15568	2.02819	0.151399	1.14429	0.751661
30	D	2017-06-19	8	1	High	SBPV	177.136	2	0	0	1.57143	3.57143	0	0.0785714	0.0957143	0	0.0871429	0	0	-0.859224	-0.0743232	-1.19952	-0.686669	-0.220546	-0.192673	-0.676475	-0.507398	-0.371564	-1.14086	-0.583046	-1.18206	-1.19928
32	B	2017-06-21	10	1	High	SBPV	183.942	0.142857	0	0.857143	3.42857	3.57143	0.0714286	0.27	0.0185714	0	0.144286	0.0357143	0.857143	-0.810446	-1.14223	-1.19952	0.886427	0.983635	-0.192673	1.23293	1.51788	-1.1213	-1.14086	0.190054	0.139732	-0.13513
35	E	2017-06-25	14	1	Low	SBPV	570.578	0.428571	0.142857	1.57143	1.57143	2	0.125714	0.125714	0.0357143	0.0114286	0.0807143	0.0685714	1.71429	1.96045	-0.977936	-0.909977	2.19734	-0.220546	-0.837711	2.68408	-0.00863657	-0.954696	-0.802825	-0.670019	1.35578	0.92902
37	B	2017-06-19	8	1	High	UNinoc	183.942	0.571429	0.142857	0	1.57143	2.14286	0	0.125714	0.0457143	0.00857143	0.0857143	0.00428571	0.142857	-0.810446	-0.89579	-0.909977	-0.686669	-0.220546	-0.779071	-0.676475	-0.00863657	-0.857507	-0.887333	-0.602373	-1.02344	-1.02192
4	B	2017-06-19	8	1	High	UNinoc	183.942	3.85714	1.57143	2	5.28571	9.14286	0.12	0.311429	0.241429	0.0985714	0.276429	0.109286	3.57143	-0.810446	0.993583	1.9854	2.98389	2.18782	2.09428	2.53133	1.95618	1.04461	1.77467	1.97785	2.86262	3.23468
5	B	2017-06-23	12	1	High	UNinoc	183.942	3.71429	0.571429	0.428571	5	8.71429	0.0242857	0.307143	0.245714	0.0357143	0.276429	0.03	1	-0.810446	0.911437	-0.0413626	0.0998791	2.00256	1.91836	-0.0272772	1.91084	1.08626	-0.0845079	1.97785	-0.0717544	0.0422282
8	A	2017-06-17	6	1	Low	SBPV	389.771	1.28571	1.14286	0	0	1.28571	0	0	0.0942857	0.0757143	0.0471429	0.0378571	1.14286	0.664669	-0.485056	1.11679	-0.686669	-1.23947	-1.13091	-0.676475	-1.33867	-0.385449	1.0986	-1.12421	0.21904	0.219586

## Sheet: Bailesetal_datafile6_ESM.csv
X	comp	tp	col	treat	den	bee	SBPV_C	Int_C	BeeUI	LowHigh	type	ColNum	AvInCol	AvInComp	AvBees	AverageFlowers	FlwPBee	beesFROMany	beesFROMsbpv	beesTOsbpv	beesTOany	drift2way	sbpv2way	perFROMany	perFROMsbpv	perTOany	perTOsbpv	per2way	persbpv2way
1	A	0	8	SBPV	low	9	1	4	2019-09-08	Low	SBPV	3	9.33333	9.33333	43.2667	20746.5	479.502	1.28571	0	NA	0	1.28571	NA	0.121429	NA	0	NA	0.121429	NA
2	A	0	9	Crithidia	low	33	0	0	1933-09-01	Low	UNinoc	3	14.4	15.4667	43.2667	20746.5	479.502	0.642857	0	0.857143	1.14286	1.78571	0.857143	0.0464286	0	0.0685714	0.0535714	0.115	0.0535714
3	A	0	9	Crithidia	low	27	0	0	2027-09-01	Low	UNinoc	3	14.4	15.4667	43.2667	20746.5	479.502	0.642857	0	0.857143	1.14286	1.78571	0.857143	0.0464286	0	0.0685714	0.0535714	0.115	0.0535714
4	A	0	20	UNinoc	low	16	0	0	20-16	Low	UNinoc	3	17.4667	18.4667	43.2667	20746.5	479.502	0.285714	0	0.428571	1.07143	1.35714	0.428571	0.0135714	0	0.0557143	0.0228571	0.0692857	0.0246154
5	A	0	9	Crithidia	low	25	0	0	2025-09-01	Low	UNinoc	3	14.4	15.4667	43.2667	20746.5	479.502	0.642857	0	0.857143	1.14286	1.78571	0.857143	0.0464286	0	0.0685714	0.0535714	0.115	0.0535714
6	A	0	20	UNinoc	low	8	0	0	2019-08-20	Low	UNinoc	3	17.4667	18.4667	43.2667	20746.5	479.502	0.285714	0	0.428571	1.07143	1.35714	0.428571	0.0135714	0	0.0557143	0.0228571	0.0692857	0.0246154
7	A	0	8	SBPV	low	2	1	3	2019-02-08	Low	SBPV	3	9.33333	9.33333	43.2667	20746.5	479.502	1.28571	0	NA	0	1.28571	NA	0.121429	NA	0	NA	0.121429	NA
8	A	0	20	UNinoc	low	31	0	0	20-31	Low	UNinoc	3	17.4667	18.4667	43.2667	20746.5	479.502	0.285714	0	0.428571	1.07143	1.35714	0.428571	0.0135714	0	0.0557143	0.0228571	0.0692857	0.0246154
9	A	0	8	SBPV	low	16	1	4	2016-08-01	Low	SBPV	3	9.33333	9.33333	43.2667	20746.5	479.502	1.28571	0	NA	0	1.28571	NA	0.121429	NA	0	NA	0.121429	NA
10	A	1	20	UNinoc	low	19	0	0	20-19	Low	UNinoc	3	17.4667	18.4667	43.2667	20746.5	479.502	0.285714	0	0.428571	1.07143	1.35714	0.428571	0.0135714	0	0.0557143	0.0228571	0.0692857	0.0246154
11	A	1	20	UNinoc	low	24	0	0	20-24	Low	UNinoc	3	17.4667	18.4667	43.2667	20746.5	479.502	0.285714	0	0.428571	1.07143	1.35714	0.428571	0.0135714	0	0.0557143	0.0228571	0.0692857	0.0246154
12	A	1	9	Crithidia	low	12	0	0	2019-12-09	Low	UNinoc	3	14.4	15.4667	43.2667	20746.5	479.502	0.642857	0	0.857143	1.14286	1.78571	0.857143	0.0464286	0	0.0685714	0.0535714	0.115	0.0535714
13	A	1	9	Crithidia	low	5	0	0	2019-05-09	Low	UNinoc	3	14.4	15.4667	43.2667	20746.5	479.502	0.642857	0	0.857143	1.14286	1.78571	0.857143	0.0464286	0	0.0685714	0.0535714	0.115	0.0535714
14	A	1	20	UNinoc	low	2	0	0	2019-02-20	Low	UNinoc	3	17.4667	18.4667	43.2667	20746.5	479.502	0.285714	0	0.428571	1.07143	1.35714	0.428571	0.0135714	0	0.0557143	0.0228571	0.0692857	0.0246154
15	A	1	9	Crithidia	low	36	0	0	1936-09-01	Low	UNinoc	3	14.4	15.4667	43.2667	20746.5	479.502	0.642857	0	0.857143	1.14286	1.78571	0.857143	0.0464286	0	0.0685714	0.0535714	0.115	0.0535714
16	A	1	8	SBPV	low	31	1	3	1931-08-01	Low	SBPV	3	9.33333	9.33333	43.2667	20746.5	479.502	1.28571	0	NA	0	1.28571	NA	0.121429	NA	0	NA	0.121429	NA
17	A	1	20	UNinoc	low	27	0	0	20-27	Low	UNinoc	3	17.4667	18.4667	43.2667	20746.5	479.502	0.285714	0	0.428571	1.07143	1.35714	0.428571	0.0135714	0	0.0557143	0.0228571	0.0692857	0.0246154
18	A	1	9	Crithidia	low	16	0	0	2016-09-01	Low	UNinoc	3	14.4	15.4667	43.2667	20746.5	479.502	0.642857	0	0.857143	1.14286	1.78571	0.857143	0.0464286	0	0.0685714	0.0535714	0.115	0.0535714
19	A	1	8	SBPV	low	26	1	3	2026-08-01	Low	SBPV	3	9.33333	9.33333	43.2667	20746.5	479.502	1.28571	0	NA	0	1.28571	NA	0.121429	NA	0	NA	0.121429	NA
20	A	2	20	UNinoc	low	35	0	0	20-35	Low	UNinoc	3	17.4667	18.4667	43.2667	20746.5	479.502	0.285714	0	0.428571	1.07143	1.35714	0.428571	0.0135714	0	0.0557143	0.0228571	0.0692857	0.0246154
21	A	2	20	UNinoc	low	38	0	0	20-38	Low	UNinoc	3	17.4667	18.4667	43.2667	20746.5	479.502	0.285714	0	0.428571	1.07143	1.35714	0.428571	0.0135714	0	0.0557143	0.0228571	0.0692857	0.0246154
22	A	2	20	UNinoc	low	40	0	0	20-40	Low	UNinoc	3	17.4667	18.4667	43.2667	20746.5	479.502	0.285714	0	0.428571	1.07143	1.35714	0.428571	0.0135714	0	0.0557143	0.0228571	0.0692857	0.0246154
23	A	2	9	Crithidia	low	ft2	0	0	9-ft2	Low	UNinoc	3	14.4	15.4667	43.2667	20746.5	479.502	0.642857	0	0.857143	1.14286	1.78571	0.857143	0.0464286	0	0.0685714	0.0535714	0.115	0.0535714
24	A	2	9	Crithidia	low	31	1	1	1931-09-01	Low	UNinoc	3	14.4	15.4667	43.2667	20746.5	479.502	0.642857	0	0.857143	1.14286	1.78571	0.857143	0.0464286	0	0.0685714	0.0535714	0.115	0.0535714
25	A	2	20	UNinoc	low	11	0	0	2019-11-20	Low	UNinoc	3	17.4667	18.4667	43.2667	20746.5	479.502	0.285714	0	0.428571	1.07143	1.35714	0.428571	0.0135714	0	0.0557143	0.0228571	0.0692857	0.0246154
26	A	2	20	UNinoc	low	33	1	1	20-33	Low	UNinoc	3	17.4667	18.4667	43.2667	20746.5	479.502	0.285714	0	0.428571	1.07143	1.35714	0.428571	0.0135714	0	0.0557143	0.0228571	0.0692857	0.0246154
27	A	2	9	Crithidia	low	35	0	0	1935-09-01	Low	UNinoc	3	14.4	15.4667	43.2667	20746.5	479.502	0.642857	0	0.857143	1.14286	1.78571	0.857143	0.0464286	0	0.0685714	0.0535714	0.115	0.0535714
28	A	2	8	SBPV	low	35	1	1	1935-08-01	Low	SBPV	3	9.33333	9.33333	43.2667	20746.5	479.502	1.28571	0	NA	0	1.28571	NA	0.121429	NA	0	NA	0.121429	NA
29	A	2	8	SBPV	low	36	1	1	1936-08-01	Low	SBPV	3	9.33333	9.33333	43.2667	20746.5	479.502	1.28571	0	NA	0	1.28571	NA	0.121429	NA	0	NA	0.121429	NA
30	A	2	8	SBPV	low	37	0	0	1937-08-01	Low	SBPV	3	9.33333	9.33333	43.2667	20746.5	479.502	1.28571	0	NA	0	1.28571	NA	0.121429	NA	0	NA	0.121429	NA
31	A	2	9	Crithidia	low	ft1	1	1	9-ft1	Low	UNinoc	3	14.4	15.4667	43.2667	20746.5	479.502	0.642857	0	0.857143	1.14286	1.78571	0.857143	0.0464286	0	0.0685714	0.0535714	0.115	0.0535714
32	A	3	9	Crithidia	low	3	1	1	2019-03-09	Low	UNinoc	3	14.4	15.4667	43.2667	20746.5	479.502	0.642857	0	0.857143	1.14286	1.78571	0.857143	0.0464286	0	0.0685714	0.0535714	0.115	0.0535714
33	A	3	20	UNinoc	low	13	0	0	20-13	Low	UNinoc	3	17.4667	18.4667	43.2667	20746.5	479.502	0.285714	0	0.428571	1.07143	1.35714	0.428571	0.0135714	0	0.0557143	0.0228571	0.0692857	0.0246154
34	A	3	9	Crithidia	low	37	0	0	1937-09-01	Low	UNinoc	3	14.4	15.4667	43.2667	20746.5	479.502	0.642857	0	0.857143	1.14286	1.78571	0.857143	0.0464286	0	0.0685714	0.0535714	0.115	0.0535714
35	A	3	20	UNinoc	low	22	1	1	20-22	Low	UNinoc	3	17.4667	18.4667	43.2667	20746.5	479.502	0.285714	0	0.428571	1.07143	1.35714	0.428571	0.0135714	0	0.0557143	0.0228571	0.0692857	0.0246154
36	A	3	9	Crithidia	low	42	0	0	1942-09-01	Low	UNinoc	3	14.4	15.4667	43.2667	20746.5	479.502	0.642857	0	0.857143	1.14286	1.78571	0.857143	0.0464286	0	0.0685714	0.0535714	0.115	0.0535714
37	A	3	20	UNinoc	low	32	0	0	20-32	Low	UNinoc	3	17.4667	18.4667	43.2667	20746.5	479.502	0.285714	0	0.428571	1.07143	1.35714	0.428571	0.0135714	0	0.0557143	0.0228571	0.0692857	0.0246154
38	A	3	9	Crithidia	low	38	0	0	1938-09-01	Low	UNinoc	3	14.4	15.4667	43.2667	20746.5	479.502	0.642857	0	0.857143	1.14286	1.78571	0.857143	0.0464286	0	0.0685714	0.0535714	0.115	0.0535714
39	A	3	20	UNinoc	low	47	0	0	20-47	Low	UNinoc	3	17.4667	18.4667	43.2667	20746.5	479.502	0.285714	0	0.428571	1.07143	1.35714	0.428571	0.0135714	0	0.0557143	0.0228571	0.0692857	0.0246154
40	A	4	20	UNinoc	low	37	1	1	20-37	Low	UNinoc	3	17.4667	18.4667	43.2667	20746.5	479.502	0.285714	0	0.428571	1.07143	1.35714	0.428571	0.0135714	0	0.0557143	0.0228571	0.0692857	0.0246154
41	A	4	20	UNinoc	low	20	0	0	20-20	Low	UNinoc	3	17.4667	18.4667	43.2667	20746.5	479.502	0.285714	0	0.428571	1.07143	1.35714	0.428571	0.0135714	0	0.0557143	0.0228571	0.0692857	0.0246154
42	A	4	9	Crithidia	low	16a	0	0	9-16a	Low	UNinoc	3	14.4	15.4667	43.2667	20746.5	479.502	0.642857	0	0.857143	1.14286	1.78571	0.857143	0.0464286	0	0.0685714	0.0535714	0.115	0.0535714
43	A	4	9	Crithidia	low	18	0	0	2018-09-01	Low	UNinoc	3	14.4	15.4667	43.2667	20746.5	479.502	0.642857	0	0.857143	1.14286	1.78571	0.857143	0.0464286	0	0.0685714	0.0535714	0.115	0.0535714
44	A	4	20	UNinoc	low	34	1	1	20-34	Low	UNinoc	3	17.4667	18.4667	43.2667	20746.5	479.502	0.285714	0	0.428571	1.07143	1.35714	0.428571	0.0135714	0	0.0557143	0.0228571	0.0692857	0.0246154
45	A	4	8	SBPV	low	32	1	1	1932-08-01	Low	SBPV	3	9.33333	9.33333	43.2667	20746.5	479.502	1.28571	0	NA	0	1.28571	NA	0.121429	NA	0	NA	0.121429	NA
46	A	4	20	UNinoc	low	21	1	1	20-21	Low	UNinoc	3	17.4667	18.4667	43.2667	20746.5	479.502	0.285714	0	0.428571	1.07143	1.35714	0.428571	0.0135714	0	0.0557143	0.0228571	0.0692857	0.0246154
47	A	4	9	Crithidia	low	29	0	0	2029-09-01	Low	UNinoc	3	14.4	15.4667	43.2667	20746.5	479.502	0.642857	0	0.857143	1.14286	1.78571	0.857143	0.0464286	0	0.0685714	0.0535714	0.115	0.0535714
48	A	4	8	SBPV	low	30	1	3	1930-08-01	Low	SBPV	3	9.33333	9.33333	43.2667	20746.5	479.502	1.28571	0	NA	0	1.28571	NA	0.121429	NA	0	NA	0.121429	NA
49	A	5	8	SBPV	low	38	1	1	1938-08-01	Low	SBPV	3	9.33333	9.33333	43.2667	20746.5	479.502	1.28571	0	NA	0	1.28571	NA	0.121429	NA	0	NA	0.121429	NA
50	A	5	9	Crithidia	low	43	0	0	1943-09-01	Low	UNinoc	3	14.4	15.4667	43.2667	20746.5	479.502	0.642857	0	0.857143	1.14286	1.78571	0.857143	0.0464286	0	0.0685714	0.0535714	0.115	0.0535714
51	A	5	20	UNinoc	low	25	1	1	20-25	Low	UNinoc	3	17.4667	18.4667	43.2667	20746.5	479.502	0.285714	0	0.428571	1.07143	1.35714	0.428571	0.0135714	0	0.0557143	0.0228571	0.0692857	0.0246154
52	A	5	20	UNinoc	low	26	1	1	20-26	Low	UNinoc	3	17.4667	18.4667	43.2667	20746.5	479.502	0.285714	0	0.428571	1.07143	1.35714	0.428571	0.0135714	0	0.0557143	0.0228571	0.0692857	0.0246154
53	A	5	9	Crithidia	low	A	0	0	9-A	Low	UNinoc	3	14.4	15.4667	43.2667	20746.5	479.502	0.642857	0	0.857143	1.14286	1.78571	0.857143	0.0464286	0	0.0685714	0.0535714	0.115	0.0535714
54	A	5	20	UNinoc	low	56	0	0	20-56	Low	UNinoc	3	17.4667	18.4667	43.2667	20746.5	479.502	0.285714	0	0.428571	1.07143	1.35714	0.428571	0.0135714	0	0.0557143	0.0228571	0.0692857	0.0246154
55	A	5	20	UNinoc	low	44	0	0	20-44	Low	UNinoc	3	17.4667	18.4667	43.2667	20746.5	479.502	0.285714	0	0.428571	1.07143	1.35714	0.428571	0.0135714	0	0.0557143	0.0228571	0.0692857	0.0246154
56	A	6	9	Crithidia	low	5a	1	1	9-5a	Low	UNinoc	3	14.4	15.4667	43.2667	20746.5	479.502	0.642857	0	0.857143	1.14286	1.78571	0.857143	0.0464286	0	0.0685714	0.0535714	0.115	0.0535714
57	A	6	20	UNinoc	low	9	0	0	2019-09-20	Low	UNinoc	3	17.4667	18.4667	43.2667	20746.5	479.502	0.285714	0	0.428571	1.07143	1.35714	0.428571	0.0135714	0	0.0557143	0.0228571	0.0692857	0.0246154
58	A	6	20	UNinoc	low	41	1	1	20-41	Low	UNinoc	3	17.4667	18.4667	43.2667	20746.5	479.502	0.285714	0	0.428571	1.07143	1.35714	0.428571	0.0135714	0	0.0557143	0.0228571	0.0692857	0.0246154
59	A	6	9	Crithidia	low	3a	1	1	9-3a	Low	UNinoc	3	14.4	15.4667	43.2667	20746.5	479.502	0.642857	0	0.857143	1.14286	1.78571	0.857143	0.0464286	0	0.0685714	0.0535714	0.115	0.0535714
60	A	6	8	SBPV	low	29	1	2	2029-08-01	Low	SBPV	3	9.33333	9.33333	43.2667	20746.5	479.502	1.28571	0	NA	0	1.28571	NA	0.121429	NA	0	NA	0.121429	NA
61	A	7	20	UNinoc	low	3	1	1	2019-03-20	Low	UNinoc	3	17.4667	18.4667	43.2667	20746.5	479.502	0.285714	0	0.428571	1.07143	1.35714	0.428571	0.0135714	0	0.0557143	0.0228571	0.0692857	0.0246154
62	A	7	9	Crithidia	low	39	0	0	1939-09-01	Low	UNinoc	3	14.4	15.4667	43.2667	20746.5	479.502	0.642857	0	0.857143	1.14286	1.78571	0.857143	0.0464286	0	0.0685714	0.0535714	0.115	0.0535714
63	A	7	20	UNinoc	low	51	0	0	20-51	Low	UNinoc	3	17.4667	18.4667	43.2667	20746.5	479.502	0.285714	0	0.428571	1.07143	1.35714	0.428571	0.0135714	0	0.0557143	0.0228571	0.0692857	0.0246154
64	A	7	20	UNinoc	low	17	1	2	20-17	Low	UNinoc	3	17.4667	18.4667	43.2667	20746.5	479.502	0.285714	0	0.428571	1.07143	1.35714	0.428571	0.0135714	0	0.0557143	0.0228571	0.0692857	0.0246154
65	A	7	8	SBPV	low	17	1	4	2017-08-01	Low	SBPV	3	9.33333	9.33333	43.2667	20746.5	479.502	1.28571	0	NA	0	1.28571	NA	0.121429	NA	0	NA	0.121429	NA
66	A	7	9	Crithidia	low	48	0	0	1948-09-01	Low	UNinoc	3	14.4	15.4667	43.2667	20746.5	479.502	0.642857	0	0.857143	1.14286	1.78571	0.857143	0.0464286	0	0.0685714	0.0535714	0.115	0.0535714
67	A	7	8	SBPV	low	22	1	3	2022-08-01	Low	SBPV	3	9.33333	9.33333	43.2667	20746.5	479.502	1.28571	0	NA	0	1.28571	NA	0.121429	NA	0	NA	0.121429	NA
68	A	7	9	Crithidia	low	44	1	1	1944-09-01	Low	UNinoc	3	14.4	15.4667	43.2667	20746.5	479.502	0.642857	0	0.857143	1.14286	1.78571	0.857143	0.0464286	0	0.0685714	0.0535714	0.115	0.0535714
69	A	7	8	SBPV	low	24	1	2	2024-08-01	Low	SBPV	3	9.33333	9.33333	43.2667	20746.5	479.502	1.28571	0	NA	0	1.28571	NA	0.121429	NA	0	NA	0.121429	NA
70	B	0	32	SBPV	high	7	1	3	32-7	High	SBPV	6	9.93333	13	84.5333	18001.1	212.947	0.5	0	NA	3.28571	3.78571	NA	0.0485714	NA	0.26	NA	0.308571	NA
71	B	0	32	SBPV	high	4	1	3	32-4	High	SBPV	6	9.93333	13	84.5333	18001.1	212.947	0.5	0	NA	3.28571	3.78571	NA	0.0485714	NA	0.26	NA	0.308571	NA
72	B	0	37	UNinoc	high	7	0	0	37-7	High	UNinoc	6	11.1333	13.2667	84.5333	18001.1	212.947	0.714286	0	0	2.28571	3	0	0.0621429	0	0.175	0	0.237143	0
73	B	0	37	UNinoc	high	2	0	0	37-2	High	UNinoc	6	11.1333	13.2667	84.5333	18001.1	212.947	0.714286	0	0	2.28571	3	0	0.0621429	0	0.175	0	0.237143	0
74	B	0	5	UNinoc	high	14	0	0	2014-05-01	High	UNinoc	6	11.2	16.2	84.5333	18001.1	212.947	3.64286	0.928571	0.142857	5.35714	9	1.07143	0.256429	0.0671429	0.34	0.0107143	0.596429	0.0778571
75	B	0	12	UNinoc	high	18	0	0	2018-12-01	High	UNinoc	6	9.33333	9.53333	84.5333	18001.1	212.947	8.21429	1.21429	0.0714286	0.857143	9.07143	1.28571	0.475714	0.07	0.0792857	0.00785714	0.555	0.0778571
76	B	0	4	UNinoc	high	3	0	0	2019-03-04	High	UNinoc	6	11.1333	16.1333	84.5333	18001.1	212.947	3.64286	0.714286	0.0714286	5.35714	9	0.785714	0.256429	0.0542857	0.340714	0	0.597143	0.0542857
77	B	0	5	UNinoc	high	18	0	0	2018-05-01	High	UNinoc	6	11.2	16.2	84.5333	18001.1	212.947	3.64286	0.928571	0.142857	5.35714	9	1.07143	0.256429	0.0671429	0.34	0.0107143	0.596429	0.0778571
78	B	0	37	UNinoc	high	6	0	0	37-6	High	UNinoc	6	11.1333	13.2667	84.5333	18001.1	212.947	0.714286	0	0	2.28571	3	0	0.0621429	0	0.175	0	0.237143	0
79	B	0	4	UNinoc	high	19	0	0	2019-04-01	High	UNinoc	6	11.1333	16.1333	84.5333	18001.1	212.947	3.64286	0.714286	0.0714286	5.35714	9	0.785714	0.256429	0.0542857	0.340714	0	0.597143	0.0542857
80	B	0	4	UNinoc	high	23	0	0	2023-04-01	High	UNinoc	6	11.1333	16.1333	84.5333	18001.1	212.947	3.64286	0.714286	0.0714286	5.35714	9	0.785714	0.256429	0.0542857	0.340714	0	0.597143	0.0542857
81	B	0	12	UNinoc	high	17	0	0	2017-12-01	High	UNinoc	6	9.33333	9.53333	84.5333	18001.1	212.947	8.21429	1.21429	0.0714286	0.857143	9.07143	1.28571	0.475714	0.07	0.0792857	0.00785714	0.555	0.0778571
82	B	0	7	Crithidia	high	21	0	0	2021-07-01	High	UNinoc	6	13.7333	16.4	84.5333	18001.1	212.947	3.28571	0.428571	0.214286	2.85714	6.14286	0.642857	0.197143	0.0242857	0.174286	0.0107143	0.371429	0.035
83	B	0	12	UNinoc	high	20	0	0	2020-12-01	High	UNinoc	6	9.33333	9.53333	84.5333	18001.1	212.947	8.21429	1.21429	0.0714286	0.857143	9.07143	1.28571	0.475714	0.07	0.0792857	0.00785714	0.555	0.0778571
84	B	0	7	Crithidia	high	31	0	0	1931-07-01	High	UNinoc	6	13.7333	16.4	84.5333	18001.1	212.947	3.28571	0.428571	0.214286	2.85714	6.14286	0.642857	0.197143	0.0242857	0.174286	0.0107143	0.371429	0.035
85	B	0	32	SBPV	high	9	1	3	32-9	High	SBPV	6	9.93333	13	84.5333	18001.1	212.947	0.5	0	NA	3.28571	3.78571	NA	0.0485714	NA	0.26	NA	0.308571	NA
86	B	0	7	Crithidia	high	34	0	0	1934-07-01	High	UNinoc	6	13.7333	16.4	84.5333	18001.1	212.947	3.28571	0.428571	0.214286	2.85714	6.14286	0.642857	0.197143	0.0242857	0.174286	0.0107143	0.371429	0.035
87	B	0	5	UNinoc	high	19	0	0	2019-05-01	High	UNinoc	6	11.2	16.2	84.5333	18001.1	212.947	3.64286	0.928571	0.142857	5.35714	9	1.07143	0.256429	0.0671429	0.34	0.0107143	0.596429	0.0778571
88	B	1	4	UNinoc	high	27	0	0	2027-04-01	High	UNinoc	6	11.1333	16.1333	84.5333	18001.1	212.947	3.64286	0.714286	0.0714286	5.35714	9	0.785714	0.256429	0.0542857	0.340714	0	0.597143	0.0542857
89	B	1	12	UNinoc	high	3	0	0	2019-03-12	High	UNinoc	6	9.33333	9.53333	84.5333	18001.1	212.947	8.21429	1.21429	0.0714286	0.857143	9.07143	1.28571	0.475714	0.07	0.0792857	0.00785714	0.555	0.0778571
90	B	1	4	UNinoc	high	20	0	0	2020-04-01	High	UNinoc	6	11.1333	16.1333	84.5333	18001.1	212.947	3.64286	0.714286	0.0714286	5.35714	9	0.785714	0.256429	0.0542857	0.340714	0	0.597143	0.0542857
91	B	1	5	UNinoc	high	31	0	0	1931-05-01	High	UNinoc	6	11.2	16.2	84.5333	18001.1	212.947	3.64286	0.928571	0.142857	5.35714	9	1.07143	0.256429	0.0671429	0.34	0.0107143	0.596429	0.0778571
92	B	1	5	UNinoc	high	25	1	1	2025-05-01	High	UNinoc	6	11.2	16.2	84.5333	18001.1	212.947	3.64286	0.928571	0.142857	5.35714	9	1.07143	0.256429	0.0671429	0.34	0.0107143	0.596429	0.0778571
93	B	1	12	UNinoc	high	23	0	0	2023-12-01	High	UNinoc	6	9.33333	9.53333	84.5333	18001.1	212.947	8.21429	1.21429	0.0714286	0.857143	9.07143	1.28571	0.475714	0.07	0.0792857	0.00785714	0.555	0.0778571
94	B	1	7	Crithidia	high	40	0	0	1940-07-01	High	UNinoc	6	13.7333	16.4	84.5333	18001.1	212.947	3.28571	0.428571	0.214286	2.85714	6.14286	0.642857	0.197143	0.0242857	0.174286	0.0107143	0.371429	0.035
95	B	1	7	Crithidia	high	41	0	0	1941-07-01	High	UNinoc	6	13.7333	16.4	84.5333	18001.1	212.947	3.28571	0.428571	0.214286	2.85714	6.14286	0.642857	0.197143	0.0242857	0.174286	0.0107143	0.371429	0.035
96	B	1	7	Crithidia	high	19	1	1	2019-07-01	High	UNinoc	6	13.7333	16.4	84.5333	18001.1	212.947	3.28571	0.428571	0.214286	2.85714	6.14286	0.642857	0.197143	0.0242857	0.174286	0.0107143	0.371429	0.035
97	B	2	12	UNinoc	high	4	0	0	2019-04-12	High	UNinoc	6	9.33333	9.53333	84.5333	18001.1	212.947	8.21429	1.21429	0.0714286	0.857143	9.07143	1.28571	0.475714	0.07	0.0792857	0.00785714	0.555	0.0778571
98	B	2	5	UNinoc	high	5	0	0	2019-05-05	High	UNinoc	6	11.2	16.2	84.5333	18001.1	212.947	3.64286	0.928571	0.142857	5.35714	9	1.07143	0.256429	0.0671429	0.34	0.0107143	0.596429	0.0778571
99	B	2	37	UNinoc	high	ft	0	0	37-ft	High	UNinoc	6	11.1333	13.2667	84.5333	18001.1	212.947	0.714286	0	0	2.28571	3	0	0.0621429	0	0.175	0	0.237143	0
100	B	2	7	Crithidia	high	29	0	0	2029-07-01	High	UNinoc	6	13.7333	16.4	84.5333	18001.1	212.947	3.28571	0.428571	0.214286	2.85714	6.14286	0.642857	0.197143	0.0242857	0.174286	0.0107143	0.371429	0.035
101	B	2	4	UNinoc	high	37	0	0	1937-04-01	High	UNinoc	6	11.1333	16.1333	84.5333	18001.1	212.947	3.64286	0.714286	0.0714286	5.35714	9	0.785714	0.256429	0.0542857	0.340714	0	0.597143	0.0542857
102	B	2	37	UNinoc	high	29	0	0	37-29	High	UNinoc	6	11.1333	13.2667	84.5333	18001.1	212.947	0.714286	0	0	2.28571	3	0	0.0621429	0	0.175	0	0.237143	0
103	B	2	12	UNinoc	high	36	0	0	1936-12-01	High	UNinoc	6	9.33333	9.53333	84.5333	18001.1	212.947	8.21429	1.21429	0.0714286	0.857143	9.07143	1.28571	0.475714	0.07	0.0792857	0.00785714	0.555	0.0778571
104	B	2	5	UNinoc	high	9	0	0	2019-09-05	High	UNinoc	6	11.2	16.2	84.5333	18001.1	212.947	3.64286	0.928571	0.142857	5.35714	9	1.07143	0.256429	0.0671429	0.34	0.0107143	0.596429	0.0778571
105	B	2	7	Crithidia	high	42	0	0	1942-07-01	High	UNinoc	6	13.7333	16.4	84.5333	18001.1	212.947	3.28571	0.428571	0.214286	2.85714	6.14286	0.642857	0.197143	0.0242857	0.174286	0.0107143	0.371429	0.035
106	B	2	32	SBPV	high	34	1	1	32-34	High	SBPV	6	9.93333	13	84.5333	18001.1	212.947	0.5	0	NA	3.28571	3.78571	NA	0.0485714	NA	0.26	NA	0.308571	NA
107	B	2	4	UNinoc	high	29	1	1	2029-04-01	High	UNinoc	6	11.1333	16.1333	84.5333	18001.1	212.947	3.64286	0.714286	0.0714286	5.35714	9	0.785714	0.256429	0.0542857	0.340714	0	0.597143	0.0542857
108	B	2	7	Crithidia	high	43	1	1	1943-07-01	High	UNinoc	6	13.7333	16.4	84.5333	18001.1	212.947	3.28571	0.428571	0.214286	2.85714	6.14286	0.642857	0.197143	0.0242857	0.174286	0.0107143	0.371429	0.035
109	B	2	37	UNinoc	high	27	0	0	37-27	High	UNinoc	6	11.1333	13.2667	84.5333	18001.1	212.947	0.714286	0	0	2.28571	3	0	0.0621429	0	0.175	0	0.237143	0
110	B	3	37	UNinoc	high	30	0	0	37-30	High	UNinoc	6	11.1333	13.2667	84.5333	18001.1	212.947	0.714286	0	0	2.28571	3	0	0.0621429	0	0.175	0	0.237143	0
111	B	3	5	UNinoc	high	1	0	0	2019-01-05	High	UNinoc	6	11.2	16.2	84.5333	18001.1	212.947	3.64286	0.928571	0.142857	5.35714	9	1.07143	0.256429	0.0671429	0.34	0.0107143	0.596429	0.0778571
112	B	3	7	Crithidia	high	54	0	0	1954-07-01	High	UNinoc	6	13.7333	16.4	84.5333	18001.1	212.947	3.28571	0.428571	0.214286	2.85714	6.14286	0.642857	0.197143	0.0242857	0.174286	0.0107143	0.371429	0.035
113	B	3	5	UNinoc	high	45	0	0	1945-05-01	High	UNinoc	6	11.2	16.2	84.5333	18001.1	212.947	3.64286	0.928571	0.142857	5.35714	9	1.07143	0.256429	0.0671429	0.34	0.0107143	0.596429	0.0778571
114	B	3	32	SBPV	high	44	1	3	32-44	High	SBPV	6	9.93333	13	84.5333	18001.1	212.947	0.5	0	NA	3.28571	3.78571	NA	0.0485714	NA	0.26	NA	0.308571	NA
115	B	3	4	UNinoc	high	26	0	0	2026-04-01	High	UNinoc	6	11.1333	16.1333	84.5333	18001.1	212.947	3.64286	0.714286	0.0714286	5.35714	9	0.785714	0.256429	0.0542857	0.340714	0	0.597143	0.0542857
116	B	3	4	UNinoc	high	40	0	0	1940-04-01	High	UNinoc	6	11.1333	16.1333	84.5333	18001.1	212.947	3.64286	0.714286	0.0714286	5.35714	9	0.785714	0.256429	0.0542857	0.340714	0	0.597143	0.0542857
117	B	3	5	UNinoc	high	49	0	0	1949-05-01	High	UNinoc	6	11.2	16.2	84.5333	18001.1	212.947	3.64286	0.928571	0.142857	5.35714	9	1.07143	0.256429	0.0671429	0.34	0.0107143	0.596429	0.0778571
118	B	3	32	SBPV	high	36	1	1	32-36	High	SBPV	6	9.93333	13	84.5333	18001.1	212.947	0.5	0	NA	3.28571	3.78571	NA	0.0485714	NA	0.26	NA	0.308571	NA
119	B	3	7	Crithidia	high	53	0	0	1953-07-01	High	UNinoc	6	13.7333	16.4	84.5333	18001.1	212.947	3.28571	0.428571	0.214286	2.85714	6.14286	0.642857	0.197143	0.0242857	0.174286	0.0107143	0.371429	0.035
120	B	3	37	UNinoc	high	ft2	0	0	37-ft2	High	UNinoc	6	11.1333	13.2667	84.5333	18001.1	212.947	0.714286	0	0	2.28571	3	0	0.0621429	0	0.175	0	0.237143	0
121	B	3	7	Crithidia	high	45	0	0	1945-07-01	High	UNinoc	6	13.7333	16.4	84.5333	18001.1	212.947	3.28571	0.428571	0.214286	2.85714	6.14286	0.642857	0.197143	0.0242857	0.174286	0.0107143	0.371429	0.035
122	B	4	12	UNinoc	high	8	1	1	2019-08-12	High	UNinoc	6	9.33333	9.53333	84.5333	18001.1	212.947	8.21429	1.21429	0.0714286	0.857143	9.07143	1.28571	0.475714	0.07	0.0792857	0.00785714	0.555	0.0778571
123	B	4	37	UNinoc	high	19a	0	0	37-19a	High	UNinoc	6	11.1333	13.2667	84.5333	18001.1	212.947	0.714286	0	0	2.28571	3	0	0.0621429	0	0.175	0	0.237143	0
124	B	4	7	Crithidia	high	2	0	0	2019-02-07	High	UNinoc	6	13.7333	16.4	84.5333	18001.1	212.947	3.28571	0.428571	0.214286	2.85714	6.14286	0.642857	0.197143	0.0242857	0.174286	0.0107143	0.371429	0.035
125	B	4	12	UNinoc	high	33	0	0	1933-12-01	High	UNinoc	6	9.33333	9.53333	84.5333	18001.1	212.947	8.21429	1.21429	0.0714286	0.857143	9.07143	1.28571	0.475714	0.07	0.0792857	0.00785714	0.555	0.0778571
126	B	4	32	SBPV	high	35A	0	0	32-35A	High	SBPV	6	9.93333	13	84.5333	18001.1	212.947	0.5	0	NA	3.28571	3.78571	NA	0.0485714	NA	0.26	NA	0.308571	NA
127	B	4	4	UNinoc	high	41	0	0	1941-04-01	High	UNinoc	6	11.1333	16.1333	84.5333	18001.1	212.947	3.64286	0.714286	0.0714286	5.35714	9	0.785714	0.256429	0.0542857	0.340714	0	0.597143	0.0542857
128	B	4	4	UNinoc	high	10	0	0	2019-10-04	High	UNinoc	6	11.1333	16.1333	84.5333	18001.1	212.947	3.64286	0.714286	0.0714286	5.35714	9	0.785714	0.256429	0.0542857	0.340714	0	0.597143	0.0542857
129	B	4	32	SBPV	high	45	0	0	32-45	High	SBPV	6	9.93333	13	84.5333	18001.1	212.947	0.5	0	NA	3.28571	3.78571	NA	0.0485714	NA	0.26	NA	0.308571	NA
130	B	4	37	UNinoc	high	32	0	0	37-32	High	UNinoc	6	11.1333	13.2667	84.5333	18001.1	212.947	0.714286	0	0	2.28571	3	0	0.0621429	0	0.175	0	0.237143	0
131	B	4	7	Crithidia	high	16	0	0	2016-07-01	High	UNinoc	6	13.7333	16.4	84.5333	18001.1	212.947	3.28571	0.428571	0.214286	2.85714	6.14286	0.642857	0.197143	0.0242857	0.174286	0.0107143	0.371429	0.035
132	B	4	5	UNinoc	high	44	0	0	1944-05-01	High	UNinoc	6	11.2	16.2	84.5333	18001.1	212.947	3.64286	0.928571	0.142857	5.35714	9	1.07143	0.256429	0.0671429	0.34	0.0107143	0.596429	0.0778571
133	B	4	5	UNinoc	high	46	0	0	1946-05-01	High	UNinoc	6	11.2	16.2	84.5333	18001.1	212.947	3.64286	0.928571	0.142857	5.35714	9	1.07143	0.256429	0.0671429	0.34	0.0107143	0.596429	0.0778571
134	B	4	7	Crithidia	high	15	0	0	2015-07-01	High	UNinoc	6	13.7333	16.4	84.5333	18001.1	212.947	3.28571	0.428571	0.214286	2.85714	6.14286	0.642857	0.197143	0.0242857	0.174286	0.0107143	0.371429	0.035
135	B	4	4	UNinoc	high	38	1	1	1938-04-01	High	UNinoc	6	11.1333	16.1333	84.5333	18001.1	212.947	3.64286	0.714286	0.0714286	5.35714	9	0.785714	0.256429	0.0542857	0.340714	0	0.597143	0.0542857
136	B	5	4	UNinoc	high	43	0	0	1943-04-01	High	UNinoc	6	11.1333	16.1333	84.5333	18001.1	212.947	3.64286	0.714286	0.0714286	5.35714	9	0.785714	0.256429	0.0542857	0.340714	0	0.597143	0.0542857
137	B	5	12	UNinoc	high	22	0	0	2022-12-01	High	UNinoc	6	9.33333	9.53333	84.5333	18001.1	212.947	8.21429	1.21429	0.0714286	0.857143	9.07143	1.28571	0.475714	0.07	0.0792857	0.00785714	0.555	0.0778571
138	B	5	5	UNinoc	high	40	0	0	1940-05-01	High	UNinoc	6	11.2	16.2	84.5333	18001.1	212.947	3.64286	0.928571	0.142857	5.35714	9	1.07143	0.256429	0.0671429	0.34	0.0107143	0.596429	0.0778571
139	B	5	7	Crithidia	high	32	0	0	1932-07-01	High	UNinoc	6	13.7333	16.4	84.5333	18001.1	212.947	3.28571	0.428571	0.214286	2.85714	6.14286	0.642857	0.197143	0.0242857	0.174286	0.0107143	0.371429	0.035
140	B	5	32	SBPV	high	42	0	0	32-42	High	SBPV	6	9.93333	13	84.5333	18001.1	212.947	0.5	0	NA	3.28571	3.78571	NA	0.0485714	NA	0.26	NA	0.308571	NA
141	B	5	37	UNinoc	high	31	0	0	37-31	High	UNinoc	6	11.1333	13.2667	84.5333	18001.1	212.947	0.714286	0	0	2.28571	3	0	0.0621429	0	0.175	0	0.237143	0
142	B	5	7	Crithidia	high	6	0	0	2019-06-07	High	UNinoc	6	13.7333	16.4	84.5333	18001.1	212.947	3.28571	0.428571	0.214286	2.85714	6.14286	0.642857	0.197143	0.0242857	0.174286	0.0107143	0.371429	0.035
143	B	5	4	UNinoc	high	49	0	0	1949-04-01	High	UNinoc	6	11.1333	16.1333	84.5333	18001.1	212.947	3.64286	0.714286	0.0714286	5.35714	9	0.785714	0.256429	0.0542857	0.340714	0	0.597143	0.0542857
144	B	5	4	UNinoc	high	45	0	0	1945-04-01	High	UNinoc	6	11.1333	16.1333	84.5333	18001.1	212.947	3.64286	0.714286	0.0714286	5.35714	9	0.785714	0.256429	0.0542857	0.340714	0	0.597143	0.0542857
145	B	5	7	Crithidia	high	55	0	0	1955-07-01	High	UNinoc	6	13.7333	16.4	84.5333	18001.1	212.947	3.28571	0.428571	0.214286	2.85714	6.14286	0.642857	0.197143	0.0242857	0.174286	0.0107143	0.371429	0.035
146	B	5	12	UNinoc	high	30	0	0	1930-12-01	High	UNinoc	6	9.33333	9.53333	84.5333	18001.1	212.947	8.21429	1.21429	0.0714286	0.857143	9.07143	1.28571	0.475714	0.07	0.0792857	0.00785714	0.555	0.0778571
147	B	5	5	UNinoc	high	43	0	0	1943-05-01	High	UNinoc	6	11.2	16.2	84.5333	18001.1	212.947	3.64286	0.928571	0.142857	5.35714	9	1.07143	0.256429	0.0671429	0.34	0.0107143	0.596429	0.0778571
148	B	5	37	UNinoc	high	38	0	0	37-38	High	UNinoc	6	11.1333	13.2667	84.5333	18001.1	212.947	0.714286	0	0	2.28571	3	0	0.0621429	0	0.175	0	0.237143	0
149	B	5	32	SBPV	high	40	1	1	32-40	High	SBPV	6	9.93333	13	84.5333	18001.1	212.947	0.5	0	NA	3.28571	3.78571	NA	0.0485714	NA	0.26	NA	0.308571	NA
150	B	5	7	Crithidia	high	50	0	0	1950-07-01	High	UNinoc	6	13.7333	16.4	84.5333	18001.1	212.947	3.28571	0.428571	0.214286	2.85714	6.14286	0.642857	0.197143	0.0242857	0.174286	0.0107143	0.371429	0.035
151	B	6	12	UNinoc	high	14	0	0	2014-12-01	High	UNinoc	6	9.33333	9.53333	84.5333	18001.1	212.947	8.21429	1.21429	0.0714286	0.857143	9.07143	1.28571	0.475714	0.07	0.0792857	0.00785714	0.555	0.0778571
152	B	6	5	UNinoc	high	47	0	0	1947-05-01	High	UNinoc	6	11.2	16.2	84.5333	18001.1	212.947	3.64286	0.928571	0.142857	5.35714	9	1.07143	0.256429	0.0671429	0.34	0.0107143	0.596429	0.0778571
153	B	6	7	Crithidia	high	4	0	0	2019-04-07	High	UNinoc	6	13.7333	16.4	84.5333	18001.1	212.947	3.28571	0.428571	0.214286	2.85714	6.14286	0.642857	0.197143	0.0242857	0.174286	0.0107143	0.371429	0.035
154	B	6	4	UNinoc	high	16	0	0	2016-04-01	High	UNinoc	6	11.1333	16.1333	84.5333	18001.1	212.947	3.64286	0.714286	0.0714286	5.35714	9	0.785714	0.256429	0.0542857	0.340714	0	0.597143	0.0542857
155	B	6	37	UNinoc	high	22	0	0	37-22	High	UNinoc	6	11.1333	13.2667	84.5333	18001.1	212.947	0.714286	0	0	2.28571	3	0	0.0621429	0	0.175	0	0.237143	0
156	B	6	5	UNinoc	high	4	0	0	2019-04-05	High	UNinoc	6	11.2	16.2	84.5333	18001.1	212.947	3.64286	0.928571	0.142857	5.35714	9	1.07143	0.256429	0.0671429	0.34	0.0107143	0.596429	0.0778571
157	B	6	12	UNinoc	high	21	0	0	2021-12-01	High	UNinoc	6	9.33333	9.53333	84.5333	18001.1	212.947	8.21429	1.21429	0.0714286	0.857143	9.07143	1.28571	0.475714	0.07	0.0792857	0.00785714	0.555	0.0778571
158	B	6	32	SBPV	high	47	1	1	32-47	High	SBPV	6	9.93333	13	84.5333	18001.1	212.947	0.5	0	NA	3.28571	3.78571	NA	0.0485714	NA	0.26	NA	0.308571	NA
159	B	6	37	UNinoc	high	46	1	1	37-46	High	UNinoc	6	11.1333	13.2667	84.5333	18001.1	212.947	0.714286	0	0	2.28571	3	0	0.0621429	0	0.175	0	0.237143	0
160	B	6	37	UNinoc	high	19	0	0	37-19	High	UNinoc	6	11.1333	13.2667	84.5333	18001.1	212.947	0.714286	0	0	2.28571	3	0	0.0621429	0	0.175	0	0.237143	0
161	B	6	32	SBPV	high	35	0	0	32-35	High	SBPV	6	9.93333	13	84.5333	18001.1	212.947	0.5	0	NA	3.28571	3.78571	NA	0.0485714	NA	0.26	NA	0.308571	NA
162	B	6	7	Crithidia	high	58	0	0	1958-07-01	High	UNinoc	6	13.7333	16.4	84.5333	18001.1	212.947	3.28571	0.428571	0.214286	2.85714	6.14286	0.642857	0.197143	0.0242857	0.174286	0.0107143	0.371429	0.035
163	B	6	7	Crithidia	high	52	0	0	1952-07-01	High	UNinoc	6	13.7333	16.4	84.5333	18001.1	212.947	3.28571	0.428571	0.214286	2.85714	6.14286	0.642857	0.197143	0.0242857	0.174286	0.0107143	0.371429	0.035
164	B	7	12	UNinoc	high	5	0	0	2019-05-12	High	UNinoc	6	9.33333	9.53333	84.5333	18001.1	212.947	8.21429	1.21429	0.0714286	0.857143	9.07143	1.28571	0.475714	0.07	0.0792857	0.00785714	0.555	0.0778571
165	B	7	12	UNinoc	high	12	0	0	2019-12-12	High	UNinoc	6	9.33333	9.53333	84.5333	18001.1	212.947	8.21429	1.21429	0.0714286	0.857143	9.07143	1.28571	0.475714	0.07	0.0792857	0.00785714	0.555	0.0778571
166	B	7	4	UNinoc	high	44	0	0	1944-04-01	High	UNinoc	6	11.1333	16.1333	84.5333	18001.1	212.947	3.64286	0.714286	0.0714286	5.35714	9	0.785714	0.256429	0.0542857	0.340714	0	0.597143	0.0542857
167	B	7	12	UNinoc	high	7	0	0	2019-07-12	High	UNinoc	6	9.33333	9.53333	84.5333	18001.1	212.947	8.21429	1.21429	0.0714286	0.857143	9.07143	1.28571	0.475714	0.07	0.0792857	0.00785714	0.555	0.0778571
168	B	7	37	UNinoc	high	34	0	0	37-34	High	UNinoc	6	11.1333	13.2667	84.5333	18001.1	212.947	0.714286	0	0	2.28571	3	0	0.0621429	0	0.175	0	0.237143	0
169	B	7	5	UNinoc	high	50	0	0	1950-05-01	High	UNinoc	6	11.2	16.2	84.5333	18001.1	212.947	3.64286	0.928571	0.142857	5.35714	9	1.07143	0.256429	0.0671429	0.34	0.0107143	0.596429	0.0778571
170	B	7	7	Crithidia	high	3	0	0	2019-03-07	High	UNinoc	6	13.7333	16.4	84.5333	18001.1	212.947	3.28571	0.428571	0.214286	2.85714	6.14286	0.642857	0.197143	0.0242857	0.174286	0.0107143	0.371429	0.035
171	B	7	7	Crithidia	high	1	0	0	2019-01-07	High	UNinoc	6	13.7333	16.4	84.5333	18001.1	212.947	3.28571	0.428571	0.214286	2.85714	6.14286	0.642857	0.197143	0.0242857	0.174286	0.0107143	0.371429	0.035
172	B	7	4	UNinoc	high	31	0	0	1931-04-01	High	UNinoc	6	11.1333	16.1333	84.5333	18001.1	212.947	3.64286	0.714286	0.0714286	5.35714	9	0.785714	0.256429	0.0542857	0.340714	0	0.597143	0.0542857
173	B	7	4	UNinoc	high	36	0	0	1936-04-01	High	UNinoc	6	11.1333	16.1333	84.5333	18001.1	212.947	3.64286	0.714286	0.0714286	5.35714	9	0.785714	0.256429	0.0542857	0.340714	0	0.597143	0.0542857
174	B	7	37	UNinoc	high	1	0	0	37-1	High	UNinoc	6	11.1333	13.2667	84.5333	18001.1	212.947	0.714286	0	0	2.28571	3	0	0.0621429	0	0.175	0	0.237143	0
175	B	7	5	UNinoc	high	54	0	0	1954-05-01	High	UNinoc	6	11.2	16.2	84.5333	18001.1	212.947	3.64286	0.928571	0.142857	5.35714	9	1.07143	0.256429	0.0671429	0.34	0.0107143	0.596429	0.0778571
176	B	7	32	SBPV	high	5	0	0	32-5	High	SBPV	6	9.93333	13	84.5333	18001.1	212.947	0.5	0	NA	3.28571	3.78571	NA	0.0485714	NA	0.26	NA	0.308571	NA
177	B	7	32	SBPV	high	48	0	0	32-48	High	SBPV	6	9.93333	13	84.5333	18001.1	212.947	0.5	0	NA	3.28571	3.78571	NA	0.0485714	NA	0.26	NA	0.308571	NA
178	B	7	7	Crithidia	high	5	0	0	2019-05-07	High	UNinoc	6	13.7333	16.4	84.5333	18001.1	212.947	3.28571	0.428571	0.214286	2.85714	6.14286	0.642857	0.197143	0.0242857	0.174286	0.0107143	0.371429	0.035
179	B	7	37	UNinoc	high	37	0	0	37-37	High	UNinoc	6	11.1333	13.2667	84.5333	18001.1	212.947	0.714286	0	0	2.28571	3	0	0.0621429	0	0.175	0	0.237143	0
180	B	7	5	UNinoc	high	29	0	0	2029-05-01	High	UNinoc	6	11.2	16.2	84.5333	18001.1	212.947	3.64286	0.928571	0.142857	5.35714	9	1.07143	0.256429	0.0671429	0.34	0.0107143	0.596429	0.0778571
181	C	0	6	Crithidia	low	C	0	0	6-C	Low	UNinoc	3	14.8	16	51.2667	26456.5	516.057	0.5	0.428571	0.928571	1.28571	1.78571	1.35714	0.0321429	0.0292857	0.0842857	0.0614286	0.116429	0.0907143
182	C	0	10	UNinoc	low	5	1	1	2019-05-10	Low	UNinoc	3	16	16.1333	51.2667	26456.5	516.057	2.78571	2.42857	0.0714286	0.142857	2.92857	2.5	0.145	0.127143	0.00928571	0.00357143	0.154286	0.130714
183	C	0	6	Crithidia	low	B	0	0	6-B	Low	UNinoc	3	14.8	16	51.2667	26456.5	516.057	0.5	0.428571	0.928571	1.28571	1.78571	1.35714	0.0321429	0.0292857	0.0842857	0.0614286	0.116429	0.0907143
184	C	0	11	SBPV	low	11	1	1	2019-11-11	Low	SBPV	3	16.4667	19.1333	51.2667	26456.5	516.057	1	0	NA	2.85714	3.85714	NA	0.0578571	NA	0.152143	NA	0.21	NA
185	C	0	10	UNinoc	low	1	0	0	2019-01-10	Low	UNinoc	3	16	16.1333	51.2667	26456.5	516.057	2.78571	2.42857	0.0714286	0.142857	2.92857	2.5	0.145	0.127143	0.00928571	0.00357143	0.154286	0.130714
186	C	0	6	Crithidia	low	26	0	0	2026-06-01	Low	UNinoc	3	14.8	16	51.2667	26456.5	516.057	0.5	0.428571	0.928571	1.28571	1.78571	1.35714	0.0321429	0.0292857	0.0842857	0.0614286	0.116429	0.0907143
187	C	0	11	SBPV	low	3	1	2	2019-03-11	Low	SBPV	3	16.4667	19.1333	51.2667	26456.5	516.057	1	0	NA	2.85714	3.85714	NA	0.0578571	NA	0.152143	NA	0.21	NA
188	C	1	10	UNinoc	low	4	0	0	2019-04-10	Low	UNinoc	3	16	16.1333	51.2667	26456.5	516.057	2.78571	2.42857	0.0714286	0.142857	2.92857	2.5	0.145	0.127143	0.00928571	0.00357143	0.154286	0.130714
189	C	1	11	SBPV	low	28	1	3	2028-11-01	Low	SBPV	3	16.4667	19.1333	51.2667	26456.5	516.057	1	0	NA	2.85714	3.85714	NA	0.0578571	NA	0.152143	NA	0.21	NA
190	C	1	11	SBPV	low	36	1	1	1936-11-01	Low	SBPV	3	16.4667	19.1333	51.2667	26456.5	516.057	1	0	NA	2.85714	3.85714	NA	0.0578571	NA	0.152143	NA	0.21	NA
191	C	1	6	Crithidia	low	30	0	0	1930-06-01	Low	UNinoc	3	14.8	16	51.2667	26456.5	516.057	0.5	0.428571	0.928571	1.28571	1.78571	1.35714	0.0321429	0.0292857	0.0842857	0.0614286	0.116429	0.0907143
192	C	1	11	SBPV	low	32	1	1	1932-11-01	Low	SBPV	3	16.4667	19.1333	51.2667	26456.5	516.057	1	0	NA	2.85714	3.85714	NA	0.0578571	NA	0.152143	NA	0.21	NA
193	C	1	6	Crithidia	low	29	0	0	2029-06-01	Low	UNinoc	3	14.8	16	51.2667	26456.5	516.057	0.5	0.428571	0.928571	1.28571	1.78571	1.35714	0.0321429	0.0292857	0.0842857	0.0614286	0.116429	0.0907143
194	C	1	10	UNinoc	low	18	0	0	2018-10-01	Low	UNinoc	3	16	16.1333	51.2667	26456.5	516.057	2.78571	2.42857	0.0714286	0.142857	2.92857	2.5	0.145	0.127143	0.00928571	0.00357143	0.154286	0.130714
195	C	1	6	Crithidia	low	21	0	0	2021-06-01	Low	UNinoc	3	14.8	16	51.2667	26456.5	516.057	0.5	0.428571	0.928571	1.28571	1.78571	1.35714	0.0321429	0.0292857	0.0842857	0.0614286	0.116429	0.0907143
196	C	2	11	SBPV	low	29	1	2	2029-11-01	Low	SBPV	3	16.4667	19.1333	51.2667	26456.5	516.057	1	0	NA	2.85714	3.85714	NA	0.0578571	NA	0.152143	NA	0.21	NA
197	C	2	6	Crithidia	low	28	0	0	2028-06-01	Low	UNinoc	3	14.8	16	51.2667	26456.5	516.057	0.5	0.428571	0.928571	1.28571	1.78571	1.35714	0.0321429	0.0292857	0.0842857	0.0614286	0.116429	0.0907143
198	C	2	11	SBPV	low	31	1	1	1931-11-01	Low	SBPV	3	16.4667	19.1333	51.2667	26456.5	516.057	1	0	NA	2.85714	3.85714	NA	0.0578571	NA	0.152143	NA	0.21	NA
199	C	2	11	SBPV	low	37	1	2	1937-11-01	Low	SBPV	3	16.4667	19.1333	51.2667	26456.5	516.057	1	0	NA	2.85714	3.85714	NA	0.0578571	NA	0.152143	NA	0.21	NA
200	C	2	10	UNinoc	low	20	0	0	2020-10-01	Low	UNinoc	3	16	16.1333	51.2667	26456.5	516.057	2.78571	2.42857	0.0714286	0.142857	2.92857	2.5	0.145	0.127143	0.00928571	0.00357143	0.154286	0.130714
201	C	2	11	SBPV	low	47	1	3	1947-11-01	Low	SBPV	3	16.4667	19.1333	51.2667	26456.5	516.057	1	0	NA	2.85714	3.85714	NA	0.0578571	NA	0.152143	NA	0.21	NA
202	C	2	10	UNinoc	low	24	0	0	2024-10-01	Low	UNinoc	3	16	16.1333	51.2667	26456.5	516.057	2.78571	2.42857	0.0714286	0.142857	2.92857	2.5	0.145	0.127143	0.00928571	0.00357143	0.154286	0.130714
203	C	2	6	Crithidia	low	27	0	0	2027-06-01	Low	UNinoc	3	14.8	16	51.2667	26456.5	516.057	0.5	0.428571	0.928571	1.28571	1.78571	1.35714	0.0321429	0.0292857	0.0842857	0.0614286	0.116429	0.0907143
204	C	2	6	Crithidia	low	22	0	0	2022-06-01	Low	UNinoc	3	14.8	16	51.2667	26456.5	516.057	0.5	0.428571	0.928571	1.28571	1.78571	1.35714	0.0321429	0.0292857	0.0842857	0.0614286	0.116429	0.0907143
205	C	3	6	Crithidia	low	37	1	1	1937-06-01	Low	UNinoc	3	14.8	16	51.2667	26456.5	516.057	0.5	0.428571	0.928571	1.28571	1.78571	1.35714	0.0321429	0.0292857	0.0842857	0.0614286	0.116429	0.0907143
206	C	3	11	SBPV	low	46	0	0	1946-11-01	Low	SBPV	3	16.4667	19.1333	51.2667	26456.5	516.057	1	0	NA	2.85714	3.85714	NA	0.0578571	NA	0.152143	NA	0.21	NA
207	C	3	6	Crithidia	low	34	0	0	1934-06-01	Low	UNinoc	3	14.8	16	51.2667	26456.5	516.057	0.5	0.428571	0.928571	1.28571	1.78571	1.35714	0.0321429	0.0292857	0.0842857	0.0614286	0.116429	0.0907143
208	C	3	10	UNinoc	low	31	0	0	1931-10-01	Low	UNinoc	3	16	16.1333	51.2667	26456.5	516.057	2.78571	2.42857	0.0714286	0.142857	2.92857	2.5	0.145	0.127143	0.00928571	0.00357143	0.154286	0.130714
209	C	3	10	UNinoc	low	6	0	0	2019-06-10	Low	UNinoc	3	16	16.1333	51.2667	26456.5	516.057	2.78571	2.42857	0.0714286	0.142857	2.92857	2.5	0.145	0.127143	0.00928571	0.00357143	0.154286	0.130714
210	C	3	11	SBPV	low	44	1	1	1944-11-01	Low	SBPV	3	16.4667	19.1333	51.2667	26456.5	516.057	1	0	NA	2.85714	3.85714	NA	0.0578571	NA	0.152143	NA	0.21	NA
211	C	3	10	UNinoc	low	35	0	0	1935-10-01	Low	UNinoc	3	16	16.1333	51.2667	26456.5	516.057	2.78571	2.42857	0.0714286	0.142857	2.92857	2.5	0.145	0.127143	0.00928571	0.00357143	0.154286	0.130714
212	C	3	11	SBPV	low	42	1	1	1942-11-01	Low	SBPV	3	16.4667	19.1333	51.2667	26456.5	516.057	1	0	NA	2.85714	3.85714	NA	0.0578571	NA	0.152143	NA	0.21	NA
213	C	3	11	SBPV	low	40	0	0	1940-11-01	Low	SBPV	3	16.4667	19.1333	51.2667	26456.5	516.057	1	0	NA	2.85714	3.85714	NA	0.0578571	NA	0.152143	NA	0.21	NA
214	C	3	10	UNinoc	low	26	0	0	2026-10-01	Low	UNinoc	3	16	16.1333	51.2667	26456.5	516.057	2.78571	2.42857	0.0714286	0.142857	2.92857	2.5	0.145	0.127143	0.00928571	0.00357143	0.154286	0.130714
215	C	3	6	Crithidia	low	32	0	0	1932-06-01	Low	UNinoc	3	14.8	16	51.2667	26456.5	516.057	0.5	0.428571	0.928571	1.28571	1.78571	1.35714	0.0321429	0.0292857	0.0842857	0.0614286	0.116429	0.0907143
216	C	4	10	UNinoc	low	30	0	0	1930-10-01	Low	UNinoc	3	16	16.1333	51.2667	26456.5	516.057	2.78571	2.42857	0.0714286	0.142857	2.92857	2.5	0.145	0.127143	0.00928571	0.00357143	0.154286	0.130714
217	C	4	11	SBPV	low	34	1	1	1934-11-01	Low	SBPV	3	16.4667	19.1333	51.2667	26456.5	516.057	1	0	NA	2.85714	3.85714	NA	0.0578571	NA	0.152143	NA	0.21	NA
218	C	4	11	SBPV	low	35	1	1	1935-11-01	Low	SBPV	3	16.4667	19.1333	51.2667	26456.5	516.057	1	0	NA	2.85714	3.85714	NA	0.0578571	NA	0.152143	NA	0.21	NA
219	C	4	10	UNinoc	low	29	0	0	2029-10-01	Low	UNinoc	3	16	16.1333	51.2667	26456.5	516.057	2.78571	2.42857	0.0714286	0.142857	2.92857	2.5	0.145	0.127143	0.00928571	0.00357143	0.154286	0.130714
220	C	4	6	Crithidia	low	18	0	0	2018-06-01	Low	UNinoc	3	14.8	16	51.2667	26456.5	516.057	0.5	0.428571	0.928571	1.28571	1.78571	1.35714	0.0321429	0.0292857	0.0842857	0.0614286	0.116429	0.0907143
221	C	4	10	UNinoc	low	12	0	0	2019-12-10	Low	UNinoc	3	16	16.1333	51.2667	26456.5	516.057	2.78571	2.42857	0.0714286	0.142857	2.92857	2.5	0.145	0.127143	0.00928571	0.00357143	0.154286	0.130714
222	C	4	11	SBPV	low	26	1	1	2026-11-01	Low	SBPV	3	16.4667	19.1333	51.2667	26456.5	516.057	1	0	NA	2.85714	3.85714	NA	0.0578571	NA	0.152143	NA	0.21	NA
223	C	4	6	Crithidia	low	39	1	1	1939-06-01	Low	UNinoc	3	14.8	16	51.2667	26456.5	516.057	0.5	0.428571	0.928571	1.28571	1.78571	1.35714	0.0321429	0.0292857	0.0842857	0.0614286	0.116429	0.0907143
224	C	4	10	UNinoc	low	27	0	0	2027-10-01	Low	UNinoc	3	16	16.1333	51.2667	26456.5	516.057	2.78571	2.42857	0.0714286	0.142857	2.92857	2.5	0.145	0.127143	0.00928571	0.00357143	0.154286	0.130714
225	C	4	6	Crithidia	low	36	0	0	1936-06-01	Low	UNinoc	3	14.8	16	51.2667	26456.5	516.057	0.5	0.428571	0.928571	1.28571	1.78571	1.35714	0.0321429	0.0292857	0.0842857	0.0614286	0.116429	0.0907143
226	C	5	10	UNinoc	low	49	0	0	1949-10-01	Low	UNinoc	3	16	16.1333	51.2667	26456.5	516.057	2.78571	2.42857	0.0714286	0.142857	2.92857	2.5	0.145	0.127143	0.00928571	0.00357143	0.154286	0.130714
227	C	5	11	SBPV	low	43	1	1	1943-11-01	Low	SBPV	3	16.4667	19.1333	51.2667	26456.5	516.057	1	0	NA	2.85714	3.85714	NA	0.0578571	NA	0.152143	NA	0.21	NA
228	C	5	10	UNinoc	low	22	0	0	2022-10-01	Low	UNinoc	3	16	16.1333	51.2667	26456.5	516.057	2.78571	2.42857	0.0714286	0.142857	2.92857	2.5	0.145	0.127143	0.00928571	0.00357143	0.154286	0.130714
229	C	5	6	Crithidia	low	40	0	0	1940-06-01	Low	UNinoc	3	14.8	16	51.2667	26456.5	516.057	0.5	0.428571	0.928571	1.28571	1.78571	1.35714	0.0321429	0.0292857	0.0842857	0.0614286	0.116429	0.0907143
230	C	5	11	SBPV	low	51	1	2	1951-11-01	Low	SBPV	3	16.4667	19.1333	51.2667	26456.5	516.057	1	0	NA	2.85714	3.85714	NA	0.0578571	NA	0.152143	NA	0.21	NA
231	C	5	10	UNinoc	low	13	0	0	2013-10-01	Low	UNinoc	3	16	16.1333	51.2667	26456.5	516.057	2.78571	2.42857	0.0714286	0.142857	2.92857	2.5	0.145	0.127143	0.00928571	0.00357143	0.154286	0.130714
232	C	5	6	Crithidia	low	35	0	0	1935-06-01	Low	UNinoc	3	14.8	16	51.2667	26456.5	516.057	0.5	0.428571	0.928571	1.28571	1.78571	1.35714	0.0321429	0.0292857	0.0842857	0.0614286	0.116429	0.0907143
233	C	5	11	SBPV	low	50	1	1	1950-11-01	Low	SBPV	3	16.4667	19.1333	51.2667	26456.5	516.057	1	0	NA	2.85714	3.85714	NA	0.0578571	NA	0.152143	NA	0.21	NA
234	C	5	6	Crithidia	low	4	0	0	2019-04-06	Low	UNinoc	3	14.8	16	51.2667	26456.5	516.057	0.5	0.428571	0.928571	1.28571	1.78571	1.35714	0.0321429	0.0292857	0.0842857	0.0614286	0.116429	0.0907143
235	C	6	10	UNinoc	low	19	0	0	2019-10-01	Low	UNinoc	3	16	16.1333	51.2667	26456.5	516.057	2.78571	2.42857	0.0714286	0.142857	2.92857	2.5	0.145	0.127143	0.00928571	0.00357143	0.154286	0.130714
236	C	6	11	SBPV	low	39	1	1	1939-11-01	Low	SBPV	3	16.4667	19.1333	51.2667	26456.5	516.057	1	0	NA	2.85714	3.85714	NA	0.0578571	NA	0.152143	NA	0.21	NA
237	C	6	10	UNinoc	low	32	0	0	1932-10-01	Low	UNinoc	3	16	16.1333	51.2667	26456.5	516.057	2.78571	2.42857	0.0714286	0.142857	2.92857	2.5	0.145	0.127143	0.00928571	0.00357143	0.154286	0.130714
238	C	6	10	UNinoc	low	2	1	1	2019-02-10	Low	UNinoc	3	16	16.1333	51.2667	26456.5	516.057	2.78571	2.42857	0.0714286	0.142857	2.92857	2.5	0.145	0.127143	0.00928571	0.00357143	0.154286	0.130714
239	C	6	6	Crithidia	low	6	0	0	2019-06-06	Low	UNinoc	3	14.8	16	51.2667	26456.5	516.057	0.5	0.428571	0.928571	1.28571	1.78571	1.35714	0.0321429	0.0292857	0.0842857	0.0614286	0.116429	0.0907143
240	C	6	11	SBPV	low	55	1	2	1955-11-01	Low	SBPV	3	16.4667	19.1333	51.2667	26456.5	516.057	1	0	NA	2.85714	3.85714	NA	0.0578571	NA	0.152143	NA	0.21	NA
241	C	6	11	SBPV	low	41	1	1	1941-11-01	Low	SBPV	3	16.4667	19.1333	51.2667	26456.5	516.057	1	0	NA	2.85714	3.85714	NA	0.0578571	NA	0.152143	NA	0.21	NA
242	C	6	6	Crithidia	low	41	0	0	1941-06-01	Low	UNinoc	3	14.8	16	51.2667	26456.5	516.057	0.5	0.428571	0.928571	1.28571	1.78571	1.35714	0.0321429	0.0292857	0.0842857	0.0614286	0.116429	0.0907143
243	C	6	6	Crithidia	low	3	0	0	2019-03-06	Low	UNinoc	3	14.8	16	51.2667	26456.5	516.057	0.5	0.428571	0.928571	1.28571	1.78571	1.35714	0.0321429	0.0292857	0.0842857	0.0614286	0.116429	0.0907143
244	C	7	10	UNinoc	low	38	0	0	1938-10-01	Low	UNinoc	3	16	16.1333	51.2667	26456.5	516.057	2.78571	2.42857	0.0714286	0.142857	2.92857	2.5	0.145	0.127143	0.00928571	0.00357143	0.154286	0.130714
245	C	7	10	UNinoc	low	43	0	0	1943-10-01	Low	UNinoc	3	16	16.1333	51.2667	26456.5	516.057	2.78571	2.42857	0.0714286	0.142857	2.92857	2.5	0.145	0.127143	0.00928571	0.00357143	0.154286	0.130714
246	C	7	11	SBPV	low	52	1	1	1952-11-01	Low	SBPV	3	16.4667	19.1333	51.2667	26456.5	516.057	1	0	NA	2.85714	3.85714	NA	0.0578571	NA	0.152143	NA	0.21	NA
247	C	7	6	Crithidia	low	45	0	0	1945-06-01	Low	UNinoc	3	14.8	16	51.2667	26456.5	516.057	0.5	0.428571	0.928571	1.28571	1.78571	1.35714	0.0321429	0.0292857	0.0842857	0.0614286	0.116429	0.0907143
248	C	7	6	Crithidia	low	44	0	0	1944-06-01	Low	UNinoc	3	14.8	16	51.2667	26456.5	516.057	0.5	0.428571	0.928571	1.28571	1.78571	1.35714	0.0321429	0.0292857	0.0842857	0.0614286	0.116429	0.0907143
249	C	7	6	Crithidia	low	31	0	0	1931-06-01	Low	UNinoc	3	14.8	16	51.2667	26456.5	516.057	0.5	0.428571	0.928571	1.28571	1.78571	1.35714	0.0321429	0.0292857	0.0842857	0.0614286	0.116429	0.0907143
250	C	7	11	SBPV	low	10	0	0	2019-10-11	Low	SBPV	3	16.4667	19.1333	51.2667	26456.5	516.057	1	0	NA	2.85714	3.85714	NA	0.0578571	NA	0.152143	NA	0.21	NA
251	C	7	10	UNinoc	low	28	0	0	2028-10-01	Low	UNinoc	3	16	16.1333	51.2667	26456.5	516.057	2.78571	2.42857	0.0714286	0.142857	2.92857	2.5	0.145	0.127143	0.00928571	0.00357143	0.154286	0.130714
252	C	7	11	SBPV	low	49	1	1	1949-11-01	Low	SBPV	3	16.4667	19.1333	51.2667	26456.5	516.057	1	0	NA	2.85714	3.85714	NA	0.0578571	NA	0.152143	NA	0.21	NA
253	D	0	16	UNinoc	high	3	0	0	2019-03-16	High	UNinoc	6	10.0667	12.3333	94.4667	16361.7	173.201	2.92857	0.714286	0.714286	2.42857	5.35714	1.42857	0.256429	0.0671429	0.221429	0.0628571	0.477857	0.13
254	D	0	13	UNinoc	high	10	0	0	2019-10-13	High	UNinoc	6	7.53333	9.93333	94.4667	16361.7	173.201	2.07143	0.785714	0.214286	2.57143	4.64286	1	0.277143	0.147143	0.328571	0.0378571	0.605714	0.185
255	D	0	30	SBPV	high	33	1	3	30-33	High	SBPV	6	18.6	21.7333	94.4667	16361.7	173.201	1.92857	0	NA	4.35714	6.28571	NA	0.0942857	NA	0.152857	NA	0.247143	NA
256	D	0	16	UNinoc	high	6	0	0	2019-06-16	High	UNinoc	6	10.0667	12.3333	94.4667	16361.7	173.201	2.92857	0.714286	0.714286	2.42857	5.35714	1.42857	0.256429	0.0671429	0.221429	0.0628571	0.477857	0.13
257	D	0	14	UNinoc	high	10	0	0	2019-10-14	High	UNinoc	6	8.06667	8.86667	94.4667	16361.7	173.201	3.57143	0.714286	0.0714286	0.857143	4.42857	0.785714	0.367857	0.085	0.101429	0.0121429	0.469286	0.0971429
258	D	0	29	Crithidia	high	B	0	0	29-B	High	UNinoc	6	17.4667	18.5333	94.4667	16361.7	173.201	0.214286	0.0714286	0.0714286	1.14286	1.35714	0.142857	0.0107143	0.00357143	0.0635714	0	0.0742857	0.00357143
259	D	0	14	UNinoc	high	11	0	0	2019-11-14	High	UNinoc	6	8.06667	8.86667	94.4667	16361.7	173.201	3.57143	0.714286	0.0714286	0.857143	4.42857	0.785714	0.367857	0.085	0.101429	0.0121429	0.469286	0.0971429
260	D	0	15	UNinoc	high	34	0	0	15-34	High	UNinoc	6	19.7333	23.0667	94.4667	16361.7	173.201	4.21429	2.07143	0.857143	3.57143	7.78571	2.92857	0.17	0.0914286	0.152143	0.0292857	0.322143	0.120714
261	D	0	15	UNinoc	high	28	0	0	15-28	High	UNinoc	6	19.7333	23.0667	94.4667	16361.7	173.201	4.21429	2.07143	0.857143	3.57143	7.78571	2.92857	0.17	0.0914286	0.152143	0.0292857	0.322143	0.120714
262	D	0	29	Crithidia	high	6	0	0	2019-06-29	High	UNinoc	6	17.4667	18.5333	94.4667	16361.7	173.201	0.214286	0.0714286	0.0714286	1.14286	1.35714	0.142857	0.0107143	0.00357143	0.0635714	0	0.0742857	0.00357143
263	D	0	13	UNinoc	high	16	0	0	13-16	High	UNinoc	6	7.53333	9.93333	94.4667	16361.7	173.201	2.07143	0.785714	0.214286	2.57143	4.64286	1	0.277143	0.147143	0.328571	0.0378571	0.605714	0.185
264	D	0	13	UNinoc	high	A	0	0	13-A	High	UNinoc	6	7.53333	9.93333	94.4667	16361.7	173.201	2.07143	0.785714	0.214286	2.57143	4.64286	1	0.277143	0.147143	0.328571	0.0378571	0.605714	0.185
265	D	0	16	UNinoc	high	13	0	0	16-13	High	UNinoc	6	10.0667	12.3333	94.4667	16361.7	173.201	2.92857	0.714286	0.714286	2.42857	5.35714	1.42857	0.256429	0.0671429	0.221429	0.0628571	0.477857	0.13
266	D	0	30	SBPV	high	22	1	3	30-22	High	SBPV	6	18.6	21.7333	94.4667	16361.7	173.201	1.92857	0	NA	4.35714	6.28571	NA	0.0942857	NA	0.152857	NA	0.247143	NA
267	D	0	15	UNinoc	high	15	0	0	15-15	High	UNinoc	6	19.7333	23.0667	94.4667	16361.7	173.201	4.21429	2.07143	0.857143	3.57143	7.78571	2.92857	0.17	0.0914286	0.152143	0.0292857	0.322143	0.120714
268	D	0	14	UNinoc	high	19	0	0	14-19	High	UNinoc	6	8.06667	8.86667	94.4667	16361.7	173.201	3.57143	0.714286	0.0714286	0.857143	4.42857	0.785714	0.367857	0.085	0.101429	0.0121429	0.469286	0.0971429
269	D	0	29	Crithidia	high	21	0	0	29-21	High	UNinoc	6	17.4667	18.5333	94.4667	16361.7	173.201	0.214286	0.0714286	0.0714286	1.14286	1.35714	0.142857	0.0107143	0.00357143	0.0635714	0	0.0742857	0.00357143
270	D	1	15	UNinoc	high	36	0	0	15-36	High	UNinoc	6	19.7333	23.0667	94.4667	16361.7	173.201	4.21429	2.07143	0.857143	3.57143	7.78571	2.92857	0.17	0.0914286	0.152143	0.0292857	0.322143	0.120714
271	D	1	15	UNinoc	high	1	1	2	2019-01-15	High	UNinoc	6	19.7333	23.0667	94.4667	16361.7	173.201	4.21429	2.07143	0.857143	3.57143	7.78571	2.92857	0.17	0.0914286	0.152143	0.0292857	0.322143	0.120714
272	D	1	13	UNinoc	high	19	0	0	13-19	High	UNinoc	6	7.53333	9.93333	94.4667	16361.7	173.201	2.07143	0.785714	0.214286	2.57143	4.64286	1	0.277143	0.147143	0.328571	0.0378571	0.605714	0.185
273	D	1	14	UNinoc	high	16	1	1	14-16	High	UNinoc	6	8.06667	8.86667	94.4667	16361.7	173.201	3.57143	0.714286	0.0714286	0.857143	4.42857	0.785714	0.367857	0.085	0.101429	0.0121429	0.469286	0.0971429
274	D	1	14	UNinoc	high	5	0	0	2019-05-14	High	UNinoc	6	8.06667	8.86667	94.4667	16361.7	173.201	3.57143	0.714286	0.0714286	0.857143	4.42857	0.785714	0.367857	0.085	0.101429	0.0121429	0.469286	0.0971429
275	D	1	29	Crithidia	high	33	1	1	29-33	High	UNinoc	6	17.4667	18.5333	94.4667	16361.7	173.201	0.214286	0.0714286	0.0714286	1.14286	1.35714	0.142857	0.0107143	0.00357143	0.0635714	0	0.0742857	0.00357143
276	D	1	30	SBPV	high	40	1	1	30-40	High	SBPV	6	18.6	21.7333	94.4667	16361.7	173.201	1.92857	0	NA	4.35714	6.28571	NA	0.0942857	NA	0.152857	NA	0.247143	NA
277	D	1	15	UNinoc	high	23	0	0	15-23	High	UNinoc	6	19.7333	23.0667	94.4667	16361.7	173.201	4.21429	2.07143	0.857143	3.57143	7.78571	2.92857	0.17	0.0914286	0.152143	0.0292857	0.322143	0.120714
278	D	1	14	UNinoc	high	15	1	1	14-15	High	UNinoc	6	8.06667	8.86667	94.4667	16361.7	173.201	3.57143	0.714286	0.0714286	0.857143	4.42857	0.785714	0.367857	0.085	0.101429	0.0121429	0.469286	0.0971429
279	D	1	13	UNinoc	high	2	0	0	2019-02-13	High	UNinoc	6	7.53333	9.93333	94.4667	16361.7	173.201	2.07143	0.785714	0.214286	2.57143	4.64286	1	0.277143	0.147143	0.328571	0.0378571	0.605714	0.185
280	D	1	29	Crithidia	high	30	1	1	29-30	High	UNinoc	6	17.4667	18.5333	94.4667	16361.7	173.201	0.214286	0.0714286	0.0714286	1.14286	1.35714	0.142857	0.0107143	0.00357143	0.0635714	0	0.0742857	0.00357143
281	D	1	16	UNinoc	high	22	1	1	16-22	High	UNinoc	6	10.0667	12.3333	94.4667	16361.7	173.201	2.92857	0.714286	0.714286	2.42857	5.35714	1.42857	0.256429	0.0671429	0.221429	0.0628571	0.477857	0.13
282	D	1	29	Crithidia	high	28	0	0	29-28	High	UNinoc	6	17.4667	18.5333	94.4667	16361.7	173.201	0.214286	0.0714286	0.0714286	1.14286	1.35714	0.142857	0.0107143	0.00357143	0.0635714	0	0.0742857	0.00357143
283	D	1	30	SBPV	high	39	1	2	30-39	High	SBPV	6	18.6	21.7333	94.4667	16361.7	173.201	1.92857	0	NA	4.35714	6.28571	NA	0.0942857	NA	0.152857	NA	0.247143	NA
284	D	1	30	SBPV	high	26	1	4	30-26	High	SBPV	6	18.6	21.7333	94.4667	16361.7	173.201	1.92857	0	NA	4.35714	6.28571	NA	0.0942857	NA	0.152857	NA	0.247143	NA
285	D	1	16	UNinoc	high	10	0	0	2019-10-16	High	UNinoc	6	10.0667	12.3333	94.4667	16361.7	173.201	2.92857	0.714286	0.714286	2.42857	5.35714	1.42857	0.256429	0.0671429	0.221429	0.0628571	0.477857	0.13
286	D	1	15	UNinoc	high	8	0	0	2019-08-15	High	UNinoc	6	19.7333	23.0667	94.4667	16361.7	173.201	4.21429	2.07143	0.857143	3.57143	7.78571	2.92857	0.17	0.0914286	0.152143	0.0292857	0.322143	0.120714
287	D	1	29	Crithidia	high	26	1	1	29-26	High	UNinoc	6	17.4667	18.5333	94.4667	16361.7	173.201	0.214286	0.0714286	0.0714286	1.14286	1.35714	0.142857	0.0107143	0.00357143	0.0635714	0	0.0742857	0.00357143
288	D	1	16	UNinoc	high	8	0	0	2019-08-16	High	UNinoc	6	10.0667	12.3333	94.4667	16361.7	173.201	2.92857	0.714286	0.714286	2.42857	5.35714	1.42857	0.256429	0.0671429	0.221429	0.0628571	0.477857	0.13
289	D	1	13	UNinoc	high	12	1	1	2019-12-13	High	UNinoc	6	7.53333	9.93333	94.4667	16361.7	173.201	2.07143	0.785714	0.214286	2.57143	4.64286	1	0.277143	0.147143	0.328571	0.0378571	0.605714	0.185
290	D	2	15	UNinoc	high	32	1	1	15-32	High	UNinoc	6	19.7333	23.0667	94.4667	16361.7	173.201	4.21429	2.07143	0.857143	3.57143	7.78571	2.92857	0.17	0.0914286	0.152143	0.0292857	0.322143	0.120714
291	D	2	13	UNinoc	high	5	1	1	2019-05-13	High	UNinoc	6	7.53333	9.93333	94.4667	16361.7	173.201	2.07143	0.785714	0.214286	2.57143	4.64286	1	0.277143	0.147143	0.328571	0.0378571	0.605714	0.185
292	D	2	30	SBPV	high	12	1	3	2019-12-30	High	SBPV	6	18.6	21.7333	94.4667	16361.7	173.201	1.92857	0	NA	4.35714	6.28571	NA	0.0942857	NA	0.152857	NA	0.247143	NA
293	D	2	15	UNinoc	high	7	0	0	2019-07-15	High	UNinoc	6	19.7333	23.0667	94.4667	16361.7	173.201	4.21429	2.07143	0.857143	3.57143	7.78571	2.92857	0.17	0.0914286	0.152143	0.0292857	0.322143	0.120714
294	D	2	15	UNinoc	high	26	0	0	15-26	High	UNinoc	6	19.7333	23.0667	94.4667	16361.7	173.201	4.21429	2.07143	0.857143	3.57143	7.78571	2.92857	0.17	0.0914286	0.152143	0.0292857	0.322143	0.120714
295	D	2	29	Crithidia	high	40	0	0	29-40	High	UNinoc	6	17.4667	18.5333	94.4667	16361.7	173.201	0.214286	0.0714286	0.0714286	1.14286	1.35714	0.142857	0.0107143	0.00357143	0.0635714	0	0.0742857	0.00357143
296	D	2	30	SBPV	high	34	1	2	30-34	High	SBPV	6	18.6	21.7333	94.4667	16361.7	173.201	1.92857	0	NA	4.35714	6.28571	NA	0.0942857	NA	0.152857	NA	0.247143	NA
297	D	2	30	SBPV	high	20	1	3	30-20	High	SBPV	6	18.6	21.7333	94.4667	16361.7	173.201	1.92857	0	NA	4.35714	6.28571	NA	0.0942857	NA	0.152857	NA	0.247143	NA
298	D	2	15	UNinoc	high	24	1	2	15-24	High	UNinoc	6	19.7333	23.0667	94.4667	16361.7	173.201	4.21429	2.07143	0.857143	3.57143	7.78571	2.92857	0.17	0.0914286	0.152143	0.0292857	0.322143	0.120714
299	D	2	29	Crithidia	high	29	0	0	29-29	High	UNinoc	6	17.4667	18.5333	94.4667	16361.7	173.201	0.214286	0.0714286	0.0714286	1.14286	1.35714	0.142857	0.0107143	0.00357143	0.0635714	0	0.0742857	0.00357143
300	D	2	13	UNinoc	high	23	0	0	13-23	High	UNinoc	6	7.53333	9.93333	94.4667	16361.7	173.201	2.07143	0.785714	0.214286	2.57143	4.64286	1	0.277143	0.147143	0.328571	0.0378571	0.605714	0.185
301	D	2	16	UNinoc	high	5	0	0	2019-05-16	High	UNinoc	6	10.0667	12.3333	94.4667	16361.7	173.201	2.92857	0.714286	0.714286	2.42857	5.35714	1.42857	0.256429	0.0671429	0.221429	0.0628571	0.477857	0.13
302	D	2	16	UNinoc	high	26	1	1	16-26	High	UNinoc	6	10.0667	12.3333	94.4667	16361.7	173.201	2.92857	0.714286	0.714286	2.42857	5.35714	1.42857	0.256429	0.0671429	0.221429	0.0628571	0.477857	0.13
303	D	2	29	Crithidia	high	31	0	0	29-31	High	UNinoc	6	17.4667	18.5333	94.4667	16361.7	173.201	0.214286	0.0714286	0.0714286	1.14286	1.35714	0.142857	0.0107143	0.00357143	0.0635714	0	0.0742857	0.00357143
304	D	2	30	SBPV	high	45	1	4	30-45	High	SBPV	6	18.6	21.7333	94.4667	16361.7	173.201	1.92857	0	NA	4.35714	6.28571	NA	0.0942857	NA	0.152857	NA	0.247143	NA
305	D	2	16	UNinoc	high	23	0	0	16-23	High	UNinoc	6	10.0667	12.3333	94.4667	16361.7	173.201	2.92857	0.714286	0.714286	2.42857	5.35714	1.42857	0.256429	0.0671429	0.221429	0.0628571	0.477857	0.13
306	D	2	29	Crithidia	high	23	1	1	29-23	High	UNinoc	6	17.4667	18.5333	94.4667	16361.7	173.201	0.214286	0.0714286	0.0714286	1.14286	1.35714	0.142857	0.0107143	0.00357143	0.0635714	0	0.0742857	0.00357143
307	D	2	15	UNinoc	high	38	0	0	15-38	High	UNinoc	6	19.7333	23.0667	94.4667	16361.7	173.201	4.21429	2.07143	0.857143	3.57143	7.78571	2.92857	0.17	0.0914286	0.152143	0.0292857	0.322143	0.120714
308	D	2	29	Crithidia	high	37	1	1	29-37	High	UNinoc	6	17.4667	18.5333	94.4667	16361.7	173.201	0.214286	0.0714286	0.0714286	1.14286	1.35714	0.142857	0.0107143	0.00357143	0.0635714	0	0.0742857	0.00357143
309	D	3	30	SBPV	high	54	1	4	30-54	High	SBPV	6	18.6	21.7333	94.4667	16361.7	173.201	1.92857	0	NA	4.35714	6.28571	NA	0.0942857	NA	0.152857	NA	0.247143	NA
310	D	3	16	UNinoc	high	21	0	0	16-21	High	UNinoc	6	10.0667	12.3333	94.4667	16361.7	173.201	2.92857	0.714286	0.714286	2.42857	5.35714	1.42857	0.256429	0.0671429	0.221429	0.0628571	0.477857	0.13
311	D	3	16	UNinoc	high	27	0	0	16-27	High	UNinoc	6	10.0667	12.3333	94.4667	16361.7	173.201	2.92857	0.714286	0.714286	2.42857	5.35714	1.42857	0.256429	0.0671429	0.221429	0.0628571	0.477857	0.13
312	D	3	29	Crithidia	high	39	1	1	29-39	High	UNinoc	6	17.4667	18.5333	94.4667	16361.7	173.201	0.214286	0.0714286	0.0714286	1.14286	1.35714	0.142857	0.0107143	0.00357143	0.0635714	0	0.0742857	0.00357143
313	D	3	15	UNinoc	high	13	0	0	15-13	High	UNinoc	6	19.7333	23.0667	94.4667	16361.7	173.201	4.21429	2.07143	0.857143	3.57143	7.78571	2.92857	0.17	0.0914286	0.152143	0.0292857	0.322143	0.120714
314	D	3	15	UNinoc	high	52	0	0	15-52	High	UNinoc	6	19.7333	23.0667	94.4667	16361.7	173.201	4.21429	2.07143	0.857143	3.57143	7.78571	2.92857	0.17	0.0914286	0.152143	0.0292857	0.322143	0.120714
315	D	3	29	Crithidia	high	46	0	0	29-46	High	UNinoc	6	17.4667	18.5333	94.4667	16361.7	173.201	0.214286	0.0714286	0.0714286	1.14286	1.35714	0.142857	0.0107143	0.00357143	0.0635714	0	0.0742857	0.00357143
316	D	3	29	Crithidia	high	38	0	0	29-38	High	UNinoc	6	17.4667	18.5333	94.4667	16361.7	173.201	0.214286	0.0714286	0.0714286	1.14286	1.35714	0.142857	0.0107143	0.00357143	0.0635714	0	0.0742857	0.00357143
317	D	3	15	UNinoc	high	61	0	0	15-61	High	UNinoc	6	19.7333	23.0667	94.4667	16361.7	173.201	4.21429	2.07143	0.857143	3.57143	7.78571	2.92857	0.17	0.0914286	0.152143	0.0292857	0.322143	0.120714
318	D	3	30	SBPV	high	55	1	1	30-55	High	SBPV	6	18.6	21.7333	94.4667	16361.7	173.201	1.92857	0	NA	4.35714	6.28571	NA	0.0942857	NA	0.152857	NA	0.247143	NA
319	D	3	14	UNinoc	high	7	1	1	2019-07-14	High	UNinoc	6	8.06667	8.86667	94.4667	16361.7	173.201	3.57143	0.714286	0.0714286	0.857143	4.42857	0.785714	0.367857	0.085	0.101429	0.0121429	0.469286	0.0971429
320	D	3	29	Crithidia	high	49	0	0	29-49	High	UNinoc	6	17.4667	18.5333	94.4667	16361.7	173.201	0.214286	0.0714286	0.0714286	1.14286	1.35714	0.142857	0.0107143	0.00357143	0.0635714	0	0.0742857	0.00357143
321	D	3	30	SBPV	high	50	1	2	30-50	High	SBPV	6	18.6	21.7333	94.4667	16361.7	173.201	1.92857	0	NA	4.35714	6.28571	NA	0.0942857	NA	0.152857	NA	0.247143	NA
322	D	3	30	SBPV	high	58	1	1	30-58	High	SBPV	6	18.6	21.7333	94.4667	16361.7	173.201	1.92857	0	NA	4.35714	6.28571	NA	0.0942857	NA	0.152857	NA	0.247143	NA
323	D	3	15	UNinoc	high	3	0	0	2019-03-15	High	UNinoc	6	19.7333	23.0667	94.4667	16361.7	173.201	4.21429	2.07143	0.857143	3.57143	7.78571	2.92857	0.17	0.0914286	0.152143	0.0292857	0.322143	0.120714
324	D	3	14	UNinoc	high	1	1	2	2019-01-14	High	UNinoc	6	8.06667	8.86667	94.4667	16361.7	173.201	3.57143	0.714286	0.0714286	0.857143	4.42857	0.785714	0.367857	0.085	0.101429	0.0121429	0.469286	0.0971429
325	D	4	16	UNinoc	high	35	1	1	16-35	High	UNinoc	6	10.0667	12.3333	94.4667	16361.7	173.201	2.92857	0.714286	0.714286	2.42857	5.35714	1.42857	0.256429	0.0671429	0.221429	0.0628571	0.477857	0.13
326	D	4	30	SBPV	high	52	1	2	30-52	High	SBPV	6	18.6	21.7333	94.4667	16361.7	173.201	1.92857	0	NA	4.35714	6.28571	NA	0.0942857	NA	0.152857	NA	0.247143	NA
327	D	4	29	Crithidia	high	35	1	1	29-35	High	UNinoc	6	17.4667	18.5333	94.4667	16361.7	173.201	0.214286	0.0714286	0.0714286	1.14286	1.35714	0.142857	0.0107143	0.00357143	0.0635714	0	0.0742857	0.00357143
328	D	4	14	UNinoc	high	24	1	1	14-24	High	UNinoc	6	8.06667	8.86667	94.4667	16361.7	173.201	3.57143	0.714286	0.0714286	0.857143	4.42857	0.785714	0.367857	0.085	0.101429	0.0121429	0.469286	0.0971429
329	D	4	15	UNinoc	high	47	1	1	15-47	High	UNinoc	6	19.7333	23.0667	94.4667	16361.7	173.201	4.21429	2.07143	0.857143	3.57143	7.78571	2.92857	0.17	0.0914286	0.152143	0.0292857	0.322143	0.120714
330	D	4	16	UNinoc	high	24	1	1	16-24	High	UNinoc	6	10.0667	12.3333	94.4667	16361.7	173.201	2.92857	0.714286	0.714286	2.42857	5.35714	1.42857	0.256429	0.0671429	0.221429	0.0628571	0.477857	0.13
331	D	4	15	UNinoc	high	44	1	1	15-44	High	UNinoc	6	19.7333	23.0667	94.4667	16361.7	173.201	4.21429	2.07143	0.857143	3.57143	7.78571	2.92857	0.17	0.0914286	0.152143	0.0292857	0.322143	0.120714
332	D	4	30	SBPV	high	42	1	4	30-42	High	SBPV	6	18.6	21.7333	94.4667	16361.7	173.201	1.92857	0	NA	4.35714	6.28571	NA	0.0942857	NA	0.152857	NA	0.247143	NA
333	D	4	29	Crithidia	high	53	0	0	29-53	High	UNinoc	6	17.4667	18.5333	94.4667	16361.7	173.201	0.214286	0.0714286	0.0714286	1.14286	1.35714	0.142857	0.0107143	0.00357143	0.0635714	0	0.0742857	0.00357143
334	D	4	29	Crithidia	high	9	0	0	2019-09-29	High	UNinoc	6	17.4667	18.5333	94.4667	16361.7	173.201	0.214286	0.0714286	0.0714286	1.14286	1.35714	0.142857	0.0107143	0.00357143	0.0635714	0	0.0742857	0.00357143
335	D	4	13	UNinoc	high	18	1	1	13-18	High	UNinoc	6	7.53333	9.93333	94.4667	16361.7	173.201	2.07143	0.785714	0.214286	2.57143	4.64286	1	0.277143	0.147143	0.328571	0.0378571	0.605714	0.185
336	D	4	15	UNinoc	high	6	1	2	2019-06-15	High	UNinoc	6	19.7333	23.0667	94.4667	16361.7	173.201	4.21429	2.07143	0.857143	3.57143	7.78571	2.92857	0.17	0.0914286	0.152143	0.0292857	0.322143	0.120714
337	D	4	14	UNinoc	high	3	0	0	2019-03-14	High	UNinoc	6	8.06667	8.86667	94.4667	16361.7	173.201	3.57143	0.714286	0.0714286	0.857143	4.42857	0.785714	0.367857	0.085	0.101429	0.0121429	0.469286	0.0971429
338	D	4	15	UNinoc	high	58	1	1	15-58	High	UNinoc	6	19.7333	23.0667	94.4667	16361.7	173.201	4.21429	2.07143	0.857143	3.57143	7.78571	2.92857	0.17	0.0914286	0.152143	0.0292857	0.322143	0.120714
339	D	4	15	UNinoc	high	12	1	1	2019-12-15	High	UNinoc	6	19.7333	23.0667	94.4667	16361.7	173.201	4.21429	2.07143	0.857143	3.57143	7.78571	2.92857	0.17	0.0914286	0.152143	0.0292857	0.322143	0.120714
340	D	4	29	Crithidia	high	45	0	0	29-45	High	UNinoc	6	17.4667	18.5333	94.4667	16361.7	173.201	0.214286	0.0714286	0.0714286	1.14286	1.35714	0.142857	0.0107143	0.00357143	0.0635714	0	0.0742857	0.00357143
341	D	4	13	UNinoc	high	24	1	1	13-24	High	UNinoc	6	7.53333	9.93333	94.4667	16361.7	173.201	2.07143	0.785714	0.214286	2.57143	4.64286	1	0.277143	0.147143	0.328571	0.0378571	0.605714	0.185
342	D	4	30	SBPV	high	57	0	0	30-57	High	SBPV	6	18.6	21.7333	94.4667	16361.7	173.201	1.92857	0	NA	4.35714	6.28571	NA	0.0942857	NA	0.152857	NA	0.247143	NA
343	D	5	13	UNinoc	high	22	1	2	13-22	High	UNinoc	6	7.53333	9.93333	94.4667	16361.7	173.201	2.07143	0.785714	0.214286	2.57143	4.64286	1	0.277143	0.147143	0.328571	0.0378571	0.605714	0.185
344	D	5	30	SBPV	high	64	1	1	30-64	High	SBPV	6	18.6	21.7333	94.4667	16361.7	173.201	1.92857	0	NA	4.35714	6.28571	NA	0.0942857	NA	0.152857	NA	0.247143	NA
345	D	5	15	UNinoc	high	2	1	1	2019-02-15	High	UNinoc	6	19.7333	23.0667	94.4667	16361.7	173.201	4.21429	2.07143	0.857143	3.57143	7.78571	2.92857	0.17	0.0914286	0.152143	0.0292857	0.322143	0.120714
346	D	5	14	UNinoc	high	6	1	2	2019-06-14	High	UNinoc	6	8.06667	8.86667	94.4667	16361.7	173.201	3.57143	0.714286	0.0714286	0.857143	4.42857	0.785714	0.367857	0.085	0.101429	0.0121429	0.469286	0.0971429
347	D	5	29	Crithidia	high	50	1	1	29-50	High	UNinoc	6	17.4667	18.5333	94.4667	16361.7	173.201	0.214286	0.0714286	0.0714286	1.14286	1.35714	0.142857	0.0107143	0.00357143	0.0635714	0	0.0742857	0.00357143
348	D	5	15	UNinoc	high	10	1	2	2019-10-15	High	UNinoc	6	19.7333	23.0667	94.4667	16361.7	173.201	4.21429	2.07143	0.857143	3.57143	7.78571	2.92857	0.17	0.0914286	0.152143	0.0292857	0.322143	0.120714
349	D	5	16	UNinoc	high	25	1	1	16-25	High	UNinoc	6	10.0667	12.3333	94.4667	16361.7	173.201	2.92857	0.714286	0.714286	2.42857	5.35714	1.42857	0.256429	0.0671429	0.221429	0.0628571	0.477857	0.13
350	D	5	13	UNinoc	high	26	1	2	13-26	High	UNinoc	6	7.53333	9.93333	94.4667	16361.7	173.201	2.07143	0.785714	0.214286	2.57143	4.64286	1	0.277143	0.147143	0.328571	0.0378571	0.605714	0.185
351	D	5	29	Crithidia	high	54	1	1	29-54	High	UNinoc	6	17.4667	18.5333	94.4667	16361.7	173.201	0.214286	0.0714286	0.0714286	1.14286	1.35714	0.142857	0.0107143	0.00357143	0.0635714	0	0.0742857	0.00357143
352	D	5	30	SBPV	high	66	1	2	30-66	High	SBPV	6	18.6	21.7333	94.4667	16361.7	173.201	1.92857	0	NA	4.35714	6.28571	NA	0.0942857	NA	0.152857	NA	0.247143	NA
353	D	5	16	UNinoc	high	31	1	1	16-31	High	UNinoc	6	10.0667	12.3333	94.4667	16361.7	173.201	2.92857	0.714286	0.714286	2.42857	5.35714	1.42857	0.256429	0.0671429	0.221429	0.0628571	0.477857	0.13
354	D	5	15	UNinoc	high	46	1	2	15-46	High	UNinoc	6	19.7333	23.0667	94.4667	16361.7	173.201	4.21429	2.07143	0.857143	3.57143	7.78571	2.92857	0.17	0.0914286	0.152143	0.0292857	0.322143	0.120714
355	D	5	14	UNinoc	high	8	1	1	2019-08-14	High	UNinoc	6	8.06667	8.86667	94.4667	16361.7	173.201	3.57143	0.714286	0.0714286	0.857143	4.42857	0.785714	0.367857	0.085	0.101429	0.0121429	0.469286	0.0971429
356	D	5	15	UNinoc	high	21	1	1	15-21	High	UNinoc	6	19.7333	23.0667	94.4667	16361.7	173.201	4.21429	2.07143	0.857143	3.57143	7.78571	2.92857	0.17	0.0914286	0.152143	0.0292857	0.322143	0.120714
357	D	5	30	SBPV	high	67	1	1	30-67	High	SBPV	6	18.6	21.7333	94.4667	16361.7	173.201	1.92857	0	NA	4.35714	6.28571	NA	0.0942857	NA	0.152857	NA	0.247143	NA
358	D	5	16	UNinoc	high	11	1	1	2019-11-16	High	UNinoc	6	10.0667	12.3333	94.4667	16361.7	173.201	2.92857	0.714286	0.714286	2.42857	5.35714	1.42857	0.256429	0.0671429	0.221429	0.0628571	0.477857	0.13
359	D	5	30	SBPV	high	69	1	2	30-69	High	SBPV	6	18.6	21.7333	94.4667	16361.7	173.201	1.92857	0	NA	4.35714	6.28571	NA	0.0942857	NA	0.152857	NA	0.247143	NA
360	D	6	13	UNinoc	high	4	1	1	2019-04-13	High	UNinoc	6	7.53333	9.93333	94.4667	16361.7	173.201	2.07143	0.785714	0.214286	2.57143	4.64286	1	0.277143	0.147143	0.328571	0.0378571	0.605714	0.185
361	D	6	30	SBPV	high	68	1	2	30-68	High	SBPV	6	18.6	21.7333	94.4667	16361.7	173.201	1.92857	0	NA	4.35714	6.28571	NA	0.0942857	NA	0.152857	NA	0.247143	NA
362	D	6	14	UNinoc	high	17	1	1	14-17	High	UNinoc	6	8.06667	8.86667	94.4667	16361.7	173.201	3.57143	0.714286	0.0714286	0.857143	4.42857	0.785714	0.367857	0.085	0.101429	0.0121429	0.469286	0.0971429
363	D	6	16	UNinoc	high	30	0	0	16-30	High	UNinoc	6	10.0667	12.3333	94.4667	16361.7	173.201	2.92857	0.714286	0.714286	2.42857	5.35714	1.42857	0.256429	0.0671429	0.221429	0.0628571	0.477857	0.13
364	D	6	29	Crithidia	high	43	0	0	29-43	High	UNinoc	6	17.4667	18.5333	94.4667	16361.7	173.201	0.214286	0.0714286	0.0714286	1.14286	1.35714	0.142857	0.0107143	0.00357143	0.0635714	0	0.0742857	0.00357143
365	D	6	13	UNinoc	high	11	1	1	2019-11-13	High	UNinoc	6	7.53333	9.93333	94.4667	16361.7	173.201	2.07143	0.785714	0.214286	2.57143	4.64286	1	0.277143	0.147143	0.328571	0.0378571	0.605714	0.185
366	D	6	30	SBPV	high	76	1	2	30-76	High	SBPV	6	18.6	21.7333	94.4667	16361.7	173.201	1.92857	0	NA	4.35714	6.28571	NA	0.0942857	NA	0.152857	NA	0.247143	NA
367	D	6	15	UNinoc	high	64	1	1	15-64	High	UNinoc	6	19.7333	23.0667	94.4667	16361.7	173.201	4.21429	2.07143	0.857143	3.57143	7.78571	2.92857	0.17	0.0914286	0.152143	0.0292857	0.322143	0.120714
368	D	6	14	UNinoc	high	21	1	1	14-21	High	UNinoc	6	8.06667	8.86667	94.4667	16361.7	173.201	3.57143	0.714286	0.0714286	0.857143	4.42857	0.785714	0.367857	0.085	0.101429	0.0121429	0.469286	0.0971429
369	D	6	29	Crithidia	high	34	0	0	29-34	High	UNinoc	6	17.4667	18.5333	94.4667	16361.7	173.201	0.214286	0.0714286	0.0714286	1.14286	1.35714	0.142857	0.0107143	0.00357143	0.0635714	0	0.0742857	0.00357143
370	D	6	30	SBPV	high	53	1	4	30-53	High	SBPV	6	18.6	21.7333	94.4667	16361.7	173.201	1.92857	0	NA	4.35714	6.28571	NA	0.0942857	NA	0.152857	NA	0.247143	NA
371	D	6	30	SBPV	high	72	1	3	30-72	High	SBPV	6	18.6	21.7333	94.4667	16361.7	173.201	1.92857	0	NA	4.35714	6.28571	NA	0.0942857	NA	0.152857	NA	0.247143	NA
372	D	6	30	SBPV	high	75	1	2	30-75	High	SBPV	6	18.6	21.7333	94.4667	16361.7	173.201	1.92857	0	NA	4.35714	6.28571	NA	0.0942857	NA	0.152857	NA	0.247143	NA
373	D	6	29	Crithidia	high	19	1	1	29-19	High	UNinoc	6	17.4667	18.5333	94.4667	16361.7	173.201	0.214286	0.0714286	0.0714286	1.14286	1.35714	0.142857	0.0107143	0.00357143	0.0635714	0	0.0742857	0.00357143
374	D	6	16	UNinoc	high	36	1	1	16-36	High	UNinoc	6	10.0667	12.3333	94.4667	16361.7	173.201	2.92857	0.714286	0.714286	2.42857	5.35714	1.42857	0.256429	0.0671429	0.221429	0.0628571	0.477857	0.13
375	D	6	15	UNinoc	high	40	1	1	15-40	High	UNinoc	6	19.7333	23.0667	94.4667	16361.7	173.201	4.21429	2.07143	0.857143	3.57143	7.78571	2.92857	0.17	0.0914286	0.152143	0.0292857	0.322143	0.120714
376	D	6	15	UNinoc	high	72	1	1	15-72	High	UNinoc	6	19.7333	23.0667	94.4667	16361.7	173.201	4.21429	2.07143	0.857143	3.57143	7.78571	2.92857	0.17	0.0914286	0.152143	0.0292857	0.322143	0.120714
377	D	7	16	UNinoc	high	19	1	3	16-19	High	UNinoc	6	10.0667	12.3333	94.4667	16361.7	173.201	2.92857	0.714286	0.714286	2.42857	5.35714	1.42857	0.256429	0.0671429	0.221429	0.0628571	0.477857	0.13
378	D	7	30	SBPV	high	77	1	3	30-77	High	SBPV	6	18.6	21.7333	94.4667	16361.7	173.201	1.92857	0	NA	4.35714	6.28571	NA	0.0942857	NA	0.152857	NA	0.247143	NA
379	D	7	15	UNinoc	high	5	1	2	2019-05-15	High	UNinoc	6	19.7333	23.0667	94.4667	16361.7	173.201	4.21429	2.07143	0.857143	3.57143	7.78571	2.92857	0.17	0.0914286	0.152143	0.0292857	0.322143	0.120714
380	D	7	14	UNinoc	high	2	1	2	2019-02-14	High	UNinoc	6	8.06667	8.86667	94.4667	16361.7	173.201	3.57143	0.714286	0.0714286	0.857143	4.42857	0.785714	0.367857	0.085	0.101429	0.0121429	0.469286	0.0971429
381	D	7	29	Crithidia	high	16	0	0	29-16	High	UNinoc	6	17.4667	18.5333	94.4667	16361.7	173.201	0.214286	0.0714286	0.0714286	1.14286	1.35714	0.142857	0.0107143	0.00357143	0.0635714	0	0.0742857	0.00357143
382	D	7	30	SBPV	high	51	1	2	30-51	High	SBPV	6	18.6	21.7333	94.4667	16361.7	173.201	1.92857	0	NA	4.35714	6.28571	NA	0.0942857	NA	0.152857	NA	0.247143	NA
383	D	7	16	UNinoc	high	38	1	2	16-38	High	UNinoc	6	10.0667	12.3333	94.4667	16361.7	173.201	2.92857	0.714286	0.714286	2.42857	5.35714	1.42857	0.256429	0.0671429	0.221429	0.0628571	0.477857	0.13
384	D	7	29	Crithidia	high	4	1	1	2019-04-29	High	UNinoc	6	17.4667	18.5333	94.4667	16361.7	173.201	0.214286	0.0714286	0.0714286	1.14286	1.35714	0.142857	0.0107143	0.00357143	0.0635714	0	0.0742857	0.00357143
385	D	7	30	SBPV	high	8	1	2	2019-08-30	High	SBPV	6	18.6	21.7333	94.4667	16361.7	173.201	1.92857	0	NA	4.35714	6.28571	NA	0.0942857	NA	0.152857	NA	0.247143	NA
386	D	7	15	UNinoc	high	29	1	1	15-29	High	UNinoc	6	19.7333	23.0667	94.4667	16361.7	173.201	4.21429	2.07143	0.857143	3.57143	7.78571	2.92857	0.17	0.0914286	0.152143	0.0292857	0.322143	0.120714
387	D	7	13	UNinoc	high	14	1	2	13-14	High	UNinoc	6	7.53333	9.93333	94.4667	16361.7	173.201	2.07143	0.785714	0.214286	2.57143	4.64286	1	0.277143	0.147143	0.328571	0.0378571	0.605714	0.185
388	D	7	29	Crithidia	high	22	1	3	29-22	High	UNinoc	6	17.4667	18.5333	94.4667	16361.7	173.201	0.214286	0.0714286	0.0714286	1.14286	1.35714	0.142857	0.0107143	0.00357143	0.0635714	0	0.0742857	0.00357143
389	D	7	16	UNinoc	high	32	1	4	16-32	High	UNinoc	6	10.0667	12.3333	94.4667	16361.7	173.201	2.92857	0.714286	0.714286	2.42857	5.35714	1.42857	0.256429	0.0671429	0.221429	0.0628571	0.477857	0.13
390	D	7	14	UNinoc	high	25	1	1	14-25	High	UNinoc	6	8.06667	8.86667	94.4667	16361.7	173.201	3.57143	0.714286	0.0714286	0.857143	4.42857	0.785714	0.367857	0.085	0.101429	0.0121429	0.469286	0.0971429
391	D	7	15	UNinoc	high	41	1	2	15-41	High	UNinoc	6	19.7333	23.0667	94.4667	16361.7	173.201	4.21429	2.07143	0.857143	3.57143	7.78571	2.92857	0.17	0.0914286	0.152143	0.0292857	0.322143	0.120714
392	E	0	28	Crithidia	low	18	0	0	28-18	Low	UNinoc	3	10.7333	11.2	39.4	24797.4	629.376	2.35714	0.785714	0.214286	0.5	2.85714	1	0.187143	0.0628571	0.0464286	0.0192857	0.233571	0.0821429
393	E	0	19	UNinoc	low	21	0	0	19-21	Low	UNinoc	3	15.2	16.9333	39.4	24797.4	629.376	0.5	0.214286	0.285714	1.85714	2.35714	0.5	0.0342857	0.0135714	0.109286	0.0171429	0.143571	0.0307143
394	E	0	28	Crithidia	low	25A	0	0	28-25A	Low	UNinoc	3	10.7333	11.2	39.4	24797.4	629.376	2.35714	0.785714	0.214286	0.5	2.85714	1	0.187143	0.0628571	0.0464286	0.0192857	0.233571	0.0821429
395	E	0	19	UNinoc	low	2	0	0	2019-02-19	Low	UNinoc	3	15.2	16.9333	39.4	24797.4	629.376	0.5	0.214286	0.285714	1.85714	2.35714	0.5	0.0342857	0.0135714	0.109286	0.0171429	0.143571	0.0307143
396	E	0	28	Crithidia	low	A	0	0	28-A	Low	UNinoc	3	10.7333	11.2	39.4	24797.4	629.376	2.35714	0.785714	0.214286	0.5	2.85714	1	0.187143	0.0628571	0.0464286	0.0192857	0.233571	0.0821429
397	E	0	19	UNinoc	low	15	0	0	19-15	Low	UNinoc	3	15.2	16.9333	39.4	24797.4	629.376	0.5	0.214286	0.285714	1.85714	2.35714	0.5	0.0342857	0.0135714	0.109286	0.0171429	0.143571	0.0307143
398	E	0	35	SBPV	low	30	1	2	35-30	Low	SBPV	3	10.3333	11.2667	39.4	24797.4	629.376	0.5	0	NA	1	1.5	NA	0.0528571	NA	0.0828571	NA	0.135714	NA
399	E	0	35	SBPV	low	31	1	3	35-31	Low	SBPV	3	10.3333	11.2667	39.4	24797.4	629.376	0.5	0	NA	1	1.5	NA	0.0528571	NA	0.0828571	NA	0.135714	NA
400	E	1	19	UNinoc	low	25	0	0	19-25	Low	UNinoc	3	15.2	16.9333	39.4	24797.4	629.376	0.5	0.214286	0.285714	1.85714	2.35714	0.5	0.0342857	0.0135714	0.109286	0.0171429	0.143571	0.0307143
401	E	1	19	UNinoc	low	30	1	1	19-30	Low	UNinoc	3	15.2	16.9333	39.4	24797.4	629.376	0.5	0.214286	0.285714	1.85714	2.35714	0.5	0.0342857	0.0135714	0.109286	0.0171429	0.143571	0.0307143
402	E	1	19	UNinoc	low	16	1	1	19-16	Low	UNinoc	3	15.2	16.9333	39.4	24797.4	629.376	0.5	0.214286	0.285714	1.85714	2.35714	0.5	0.0342857	0.0135714	0.109286	0.0171429	0.143571	0.0307143
403	E	1	35	SBPV	low	41	1	2	35-41	Low	SBPV	3	10.3333	11.2667	39.4	24797.4	629.376	0.5	0	NA	1	1.5	NA	0.0528571	NA	0.0828571	NA	0.135714	NA
404	E	1	28	Crithidia	low	25	0	0	28-25	Low	UNinoc	3	10.7333	11.2	39.4	24797.4	629.376	2.35714	0.785714	0.214286	0.5	2.85714	1	0.187143	0.0628571	0.0464286	0.0192857	0.233571	0.0821429
405	E	1	35	SBPV	low	46	1	1	35-46	Low	SBPV	3	10.3333	11.2667	39.4	24797.4	629.376	0.5	0	NA	1	1.5	NA	0.0528571	NA	0.0828571	NA	0.135714	NA
406	E	1	35	SBPV	low	33	1	2	35-33	Low	SBPV	3	10.3333	11.2667	39.4	24797.4	629.376	0.5	0	NA	1	1.5	NA	0.0528571	NA	0.0828571	NA	0.135714	NA
407	E	1	28	Crithidia	low	31	1	2	28-31	Low	UNinoc	3	10.7333	11.2	39.4	24797.4	629.376	2.35714	0.785714	0.214286	0.5	2.85714	1	0.187143	0.0628571	0.0464286	0.0192857	0.233571	0.0821429
408	E	1	28	Crithidia	low	27	1	1	28-27	Low	UNinoc	3	10.7333	11.2	39.4	24797.4	629.376	2.35714	0.785714	0.214286	0.5	2.85714	1	0.187143	0.0628571	0.0464286	0.0192857	0.233571	0.0821429
409	E	2	19	UNinoc	low	23	0	0	19-23	Low	UNinoc	3	15.2	16.9333	39.4	24797.4	629.376	0.5	0.214286	0.285714	1.85714	2.35714	0.5	0.0342857	0.0135714	0.109286	0.0171429	0.143571	0.0307143
410	E	2	19	UNinoc	low	12	1	1	2019-12-19	Low	UNinoc	3	15.2	16.9333	39.4	24797.4	629.376	0.5	0.214286	0.285714	1.85714	2.35714	0.5	0.0342857	0.0135714	0.109286	0.0171429	0.143571	0.0307143
411	E	2	35	SBPV	low	47	0	0	35-47	Low	SBPV	3	10.3333	11.2667	39.4	24797.4	629.376	0.5	0	NA	1	1.5	NA	0.0528571	NA	0.0828571	NA	0.135714	NA
412	E	2	35	SBPV	low	42	1	1	35-42	Low	SBPV	3	10.3333	11.2667	39.4	24797.4	629.376	0.5	0	NA	1	1.5	NA	0.0528571	NA	0.0828571	NA	0.135714	NA
413	E	2	19	UNinoc	low	26	0	0	19-26	Low	UNinoc	3	15.2	16.9333	39.4	24797.4	629.376	0.5	0.214286	0.285714	1.85714	2.35714	0.5	0.0342857	0.0135714	0.109286	0.0171429	0.143571	0.0307143
414	E	2	19	UNinoc	low	6	0	0	2019-06-19	Low	UNinoc	3	15.2	16.9333	39.4	24797.4	629.376	0.5	0.214286	0.285714	1.85714	2.35714	0.5	0.0342857	0.0135714	0.109286	0.0171429	0.143571	0.0307143
415	E	3	19	UNinoc	low	5	0	0	2019-05-19	Low	UNinoc	3	15.2	16.9333	39.4	24797.4	629.376	0.5	0.214286	0.285714	1.85714	2.35714	0.5	0.0342857	0.0135714	0.109286	0.0171429	0.143571	0.0307143
416	E	3	28	Crithidia	low	19	0	0	28-19	Low	UNinoc	3	10.7333	11.2	39.4	24797.4	629.376	2.35714	0.785714	0.214286	0.5	2.85714	1	0.187143	0.0628571	0.0464286	0.0192857	0.233571	0.0821429
417	E	3	19	UNinoc	low	44	0	0	19-44	Low	UNinoc	3	15.2	16.9333	39.4	24797.4	629.376	0.5	0.214286	0.285714	1.85714	2.35714	0.5	0.0342857	0.0135714	0.109286	0.0171429	0.143571	0.0307143
418	E	3	35	SBPV	low	36	1	1	35-36	Low	SBPV	3	10.3333	11.2667	39.4	24797.4	629.376	0.5	0	NA	1	1.5	NA	0.0528571	NA	0.0828571	NA	0.135714	NA
419	E	3	19	UNinoc	low	17	0	0	19-17	Low	UNinoc	3	15.2	16.9333	39.4	24797.4	629.376	0.5	0.214286	0.285714	1.85714	2.35714	0.5	0.0342857	0.0135714	0.109286	0.0171429	0.143571	0.0307143
420	E	3	19	UNinoc	low	42	0	0	19-42	Low	UNinoc	3	15.2	16.9333	39.4	24797.4	629.376	0.5	0.214286	0.285714	1.85714	2.35714	0.5	0.0342857	0.0135714	0.109286	0.0171429	0.143571	0.0307143
421	E	3	35	SBPV	low	44	0	0	35-44	Low	SBPV	3	10.3333	11.2667	39.4	24797.4	629.376	0.5	0	NA	1	1.5	NA	0.0528571	NA	0.0828571	NA	0.135714	NA
422	E	3	28	Crithidia	low	21	0	0	28-21	Low	UNinoc	3	10.7333	11.2	39.4	24797.4	629.376	2.35714	0.785714	0.214286	0.5	2.85714	1	0.187143	0.0628571	0.0464286	0.0192857	0.233571	0.0821429
423	E	4	28	Crithidia	low	26	0	0	28-26	Low	UNinoc	3	10.7333	11.2	39.4	24797.4	629.376	2.35714	0.785714	0.214286	0.5	2.85714	1	0.187143	0.0628571	0.0464286	0.0192857	0.233571	0.0821429
424	E	4	35	SBPV	low	49	0	0	35-49	Low	SBPV	3	10.3333	11.2667	39.4	24797.4	629.376	0.5	0	NA	1	1.5	NA	0.0528571	NA	0.0828571	NA	0.135714	NA
425	E	4	19	UNinoc	low	28	0	0	19-28	Low	UNinoc	3	15.2	16.9333	39.4	24797.4	629.376	0.5	0.214286	0.285714	1.85714	2.35714	0.5	0.0342857	0.0135714	0.109286	0.0171429	0.143571	0.0307143
426	E	4	28	Crithidia	low	1	1	1	2019-01-28	Low	UNinoc	3	10.7333	11.2	39.4	24797.4	629.376	2.35714	0.785714	0.214286	0.5	2.85714	1	0.187143	0.0628571	0.0464286	0.0192857	0.233571	0.0821429
427	E	4	28	Crithidia	low	35	0	0	28-35	Low	UNinoc	3	10.7333	11.2	39.4	24797.4	629.376	2.35714	0.785714	0.214286	0.5	2.85714	1	0.187143	0.0628571	0.0464286	0.0192857	0.233571	0.0821429
428	E	4	19	UNinoc	low	35	0	0	19-35	Low	UNinoc	3	15.2	16.9333	39.4	24797.4	629.376	0.5	0.214286	0.285714	1.85714	2.35714	0.5	0.0342857	0.0135714	0.109286	0.0171429	0.143571	0.0307143
429	E	4	19	UNinoc	low	49A	0	0	19-49A	Low	UNinoc	3	15.2	16.9333	39.4	24797.4	629.376	0.5	0.214286	0.285714	1.85714	2.35714	0.5	0.0342857	0.0135714	0.109286	0.0171429	0.143571	0.0307143
430	E	4	35	SBPV	low	45	0	0	35-45	Low	SBPV	3	10.3333	11.2667	39.4	24797.4	629.376	0.5	0	NA	1	1.5	NA	0.0528571	NA	0.0828571	NA	0.135714	NA
431	E	5	19	UNinoc	low	50	0	0	19-50	Low	UNinoc	3	15.2	16.9333	39.4	24797.4	629.376	0.5	0.214286	0.285714	1.85714	2.35714	0.5	0.0342857	0.0135714	0.109286	0.0171429	0.143571	0.0307143
432	E	5	19	UNinoc	low	48	0	0	19-48	Low	UNinoc	3	15.2	16.9333	39.4	24797.4	629.376	0.5	0.214286	0.285714	1.85714	2.35714	0.5	0.0342857	0.0135714	0.109286	0.0171429	0.143571	0.0307143
433	E	5	28	Crithidia	low	34	0	0	28-34	Low	UNinoc	3	10.7333	11.2	39.4	24797.4	629.376	2.35714	0.785714	0.214286	0.5	2.85714	1	0.187143	0.0628571	0.0464286	0.0192857	0.233571	0.0821429
434	E	5	19	UNinoc	low	53	0	0	19-53	Low	UNinoc	3	15.2	16.9333	39.4	24797.4	629.376	0.5	0.214286	0.285714	1.85714	2.35714	0.5	0.0342857	0.0135714	0.109286	0.0171429	0.143571	0.0307143
435	E	5	19	UNinoc	low	34	0	0	19-34	Low	UNinoc	3	15.2	16.9333	39.4	24797.4	629.376	0.5	0.214286	0.285714	1.85714	2.35714	0.5	0.0342857	0.0135714	0.109286	0.0171429	0.143571	0.0307143
436	E	5	28	Crithidia	low	30	0	0	28-30	Low	UNinoc	3	10.7333	11.2	39.4	24797.4	629.376	2.35714	0.785714	0.214286	0.5	2.85714	1	0.187143	0.0628571	0.0464286	0.0192857	0.233571	0.0821429
437	E	5	35	SBPV	low	53	0	0	35-53	Low	SBPV	3	10.3333	11.2667	39.4	24797.4	629.376	0.5	0	NA	1	1.5	NA	0.0528571	NA	0.0828571	NA	0.135714	NA
438	E	6	28	Crithidia	low	38	0	0	28-38	Low	UNinoc	3	10.7333	11.2	39.4	24797.4	629.376	2.35714	0.785714	0.214286	0.5	2.85714	1	0.187143	0.0628571	0.0464286	0.0192857	0.233571	0.0821429
439	E	6	19	UNinoc	low	54	0	0	19-54	Low	UNinoc	3	15.2	16.9333	39.4	24797.4	629.376	0.5	0.214286	0.285714	1.85714	2.35714	0.5	0.0342857	0.0135714	0.109286	0.0171429	0.143571	0.0307143
440	E	6	19	UNinoc	low	68	0	0	19-68	Low	UNinoc	3	15.2	16.9333	39.4	24797.4	629.376	0.5	0.214286	0.285714	1.85714	2.35714	0.5	0.0342857	0.0135714	0.109286	0.0171429	0.143571	0.0307143
441	E	6	28	Crithidia	low	20	0	0	28-20	Low	UNinoc	3	10.7333	11.2	39.4	24797.4	629.376	2.35714	0.785714	0.214286	0.5	2.85714	1	0.187143	0.0628571	0.0464286	0.0192857	0.233571	0.0821429
442	E	6	35	SBPV	low	52	0	0	35-52	Low	SBPV	3	10.3333	11.2667	39.4	24797.4	629.376	0.5	0	NA	1	1.5	NA	0.0528571	NA	0.0828571	NA	0.135714	NA
443	E	6	19	UNinoc	low	69	0	0	19-69	Low	UNinoc	3	15.2	16.9333	39.4	24797.4	629.376	0.5	0.214286	0.285714	1.85714	2.35714	0.5	0.0342857	0.0135714	0.109286	0.0171429	0.143571	0.0307143
444	E	6	35	SBPV	low	54	0	0	35-54	Low	SBPV	3	10.3333	11.2667	39.4	24797.4	629.376	0.5	0	NA	1	1.5	NA	0.0528571	NA	0.0828571	NA	0.135714	NA
445	E	6	28	Crithidia	low	39	0	0	28-39	Low	UNinoc	3	10.7333	11.2	39.4	24797.4	629.376	2.35714	0.785714	0.214286	0.5	2.85714	1	0.187143	0.0628571	0.0464286	0.0192857	0.233571	0.0821429
446	E	7	19	UNinoc	low	49	1	1	19-49	Low	UNinoc	3	15.2	16.9333	39.4	24797.4	629.376	0.5	0.214286	0.285714	1.85714	2.35714	0.5	0.0342857	0.0135714	0.109286	0.0171429	0.143571	0.0307143
447	E	7	35	SBPV	low	23	0	0	35-23	Low	SBPV	3	10.3333	11.2667	39.4	24797.4	629.376	0.5	0	NA	1	1.5	NA	0.0528571	NA	0.0828571	NA	0.135714	NA
448	E	7	19	UNinoc	low	59	0	0	19-59	Low	UNinoc	3	15.2	16.9333	39.4	24797.4	629.376	0.5	0.214286	0.285714	1.85714	2.35714	0.5	0.0342857	0.0135714	0.109286	0.0171429	0.143571	0.0307143
449	E	7	28	Crithidia	low	3	0	0	2019-03-28	Low	UNinoc	3	10.7333	11.2	39.4	24797.4	629.376	2.35714	0.785714	0.214286	0.5	2.85714	1	0.187143	0.0628571	0.0464286	0.0192857	0.233571	0.0821429
450	E	7	28	Crithidia	low	32	0	0	28-32	Low	UNinoc	3	10.7333	11.2	39.4	24797.4	629.376	2.35714	0.785714	0.214286	0.5	2.85714	1	0.187143	0.0628571	0.0464286	0.0192857	0.233571	0.0821429
451	E	7	19	UNinoc	low	62	0	0	19-62	Low	UNinoc	3	15.2	16.9333	39.4	24797.4	629.376	0.5	0.214286	0.285714	1.85714	2.35714	0.5	0.0342857	0.0135714	0.109286	0.0171429	0.143571	0.0307143
452	E	7	28	Crithidia	low	28	0	0	28-28	Low	UNinoc	3	10.7333	11.2	39.4	24797.4	629.376	2.35714	0.785714	0.214286	0.5	2.85714	1	0.187143	0.0628571	0.0464286	0.0192857	0.233571	0.0821429
453	E	7	35	SBPV	low	51	0	0	35-51	Low	SBPV	3	10.3333	11.2667	39.4	24797.4	629.376	0.5	0	NA	1	1.5	NA	0.0528571	NA	0.0828571	NA	0.135714	NA
454	F	0	24	SBPV	high	22	1	4	24-22	High	SBPV	6	14.8	15.4	68.2	25594.6	375.287	1.35714	0	NA	0.642857	2	NA	0.0764286	NA	0.0442857	NA	0.120714	NA
455	F	0	24	SBPV	high	3	1	3	2019-03-24	High	SBPV	6	14.8	15.4	68.2	25594.6	375.287	1.35714	0	NA	0.642857	2	NA	0.0764286	NA	0.0442857	NA	0.120714	NA
456	F	0	26	UNinoc	high	13	0	0	26-13	High	UNinoc	6	12.6	13.3333	68.2	25594.6	375.287	1.5	0.214286	0.0714286	2.28571	3.78571	0.285714	0.0992857	0.015	0.153571	0.00428571	0.252857	0.0192857
457	F	0	22	Crithidia	high	23	0	0	22-23	High	UNinoc	6	9.46667	13.2	68.2	25594.6	375.287	1	0.0714286	0.571429	4	5	0.642857	0.105714	0.00928571	0.3	0.0314286	0.405714	0.0407143
458	F	0	17	UNinoc	high	10	0	0	2019-10-17	High	UNinoc	6	9.2	11.2	68.2	25594.6	375.287	1.14286	0.214286	0.714286	2.14286	3.28571	0.928571	0.143846	0.0169231	0.222308	0.0623077	0.366154	0.0792308
459	F	0	17	UNinoc	high	25	0	0	17-25	High	UNinoc	6	9.2	11.2	68.2	25594.6	375.287	1.14286	0.214286	0.714286	2.14286	3.28571	0.928571	0.143846	0.0169231	0.222308	0.0623077	0.366154	0.0792308
460	F	0	17	UNinoc	high	19	0	0	17-19	High	UNinoc	6	9.2	11.2	68.2	25594.6	375.287	1.14286	0.214286	0.714286	2.14286	3.28571	0.928571	0.143846	0.0169231	0.222308	0.0623077	0.366154	0.0792308
461	F	0	22	Crithidia	high	B	0	0	22-B	High	UNinoc	6	9.46667	13.2	68.2	25594.6	375.287	1	0.0714286	0.571429	4	5	0.642857	0.105714	0.00928571	0.3	0.0314286	0.405714	0.0407143
462	F	0	24	SBPV	high	6	1	3	2019-06-24	High	SBPV	6	14.8	15.4	68.2	25594.6	375.287	1.35714	0	NA	0.642857	2	NA	0.0764286	NA	0.0442857	NA	0.120714	NA
463	F	0	23	UNinoc	high	5	0	0	2019-05-23	High	UNinoc	6	7.8	8.46667	68.2	25594.6	375.287	2.42857	0	0	0.714286	3.14286	0	0.231667	0	0.0758333	0	0.3075	0
464	F	0	26	UNinoc	high	6	0	0	2019-06-26	High	UNinoc	6	12.6	13.3333	68.2	25594.6	375.287	1.5	0.214286	0.0714286	2.28571	3.78571	0.285714	0.0992857	0.015	0.153571	0.00428571	0.252857	0.0192857
465	F	0	26	UNinoc	high	5	0	0	2019-05-26	High	UNinoc	6	12.6	13.3333	68.2	25594.6	375.287	1.5	0.214286	0.0714286	2.28571	3.78571	0.285714	0.0992857	0.015	0.153571	0.00428571	0.252857	0.0192857
466	F	0	3	UNinoc	high	3	0	0	2019-03-03	High	UNinoc	6	6.26667	6.6	68.2	25594.6	375.287	2.71429	0.142857	0	0.357143	3.07143	0.142857	0.434615	0.0138462	0.246923	0	0.681538	0.0138462
467	F	0	23	UNinoc	high	1	0	0	2019-01-23	High	UNinoc	6	7.8	8.46667	68.2	25594.6	375.287	2.42857	0	0	0.714286	3.14286	0	0.231667	0	0.0758333	0	0.3075	0
468	F	0	22	Crithidia	high	28	0	0	22-28	High	UNinoc	6	9.46667	13.2	68.2	25594.6	375.287	1	0.0714286	0.571429	4	5	0.642857	0.105714	0.00928571	0.3	0.0314286	0.405714	0.0407143
469	F	0	3	UNinoc	high	19	0	0	2019-03-01	High	UNinoc	6	6.26667	6.6	68.2	25594.6	375.287	2.71429	0.142857	0	0.357143	3.07143	0.142857	0.434615	0.0138462	0.246923	0	0.681538	0.0138462
470	F	0	3	UNinoc	high	16	0	0	2016-03-01	High	UNinoc	6	6.26667	6.6	68.2	25594.6	375.287	2.71429	0.142857	0	0.357143	3.07143	0.142857	0.434615	0.0138462	0.246923	0	0.681538	0.0138462
471	F	1	23	UNinoc	high	22	0	0	23-22	High	UNinoc	6	7.8	8.46667	68.2	25594.6	375.287	2.42857	0	0	0.714286	3.14286	0	0.231667	0	0.0758333	0	0.3075	0
472	F	1	24	SBPV	high	35	1	4	24-35	High	SBPV	6	14.8	15.4	68.2	25594.6	375.287	1.35714	0	NA	0.642857	2	NA	0.0764286	NA	0.0442857	NA	0.120714	NA
473	F	1	24	SBPV	high	45	1	2	24-45	High	SBPV	6	14.8	15.4	68.2	25594.6	375.287	1.35714	0	NA	0.642857	2	NA	0.0764286	NA	0.0442857	NA	0.120714	NA
474	F	1	26	UNinoc	high	21	0	0	26-21	High	UNinoc	6	12.6	13.3333	68.2	25594.6	375.287	1.5	0.214286	0.0714286	2.28571	3.78571	0.285714	0.0992857	0.015	0.153571	0.00428571	0.252857	0.0192857
475	F	1	17	UNinoc	high	11	0	0	2019-11-17	High	UNinoc	6	9.2	11.2	68.2	25594.6	375.287	1.14286	0.214286	0.714286	2.14286	3.28571	0.928571	0.143846	0.0169231	0.222308	0.0623077	0.366154	0.0792308
476	F	1	22	Crithidia	high	31	1	2	22-31	High	UNinoc	6	9.46667	13.2	68.2	25594.6	375.287	1	0.0714286	0.571429	4	5	0.642857	0.105714	0.00928571	0.3	0.0314286	0.405714	0.0407143
477	F	1	3	UNinoc	high	8	0	0	2019-08-03	High	UNinoc	6	6.26667	6.6	68.2	25594.6	375.287	2.71429	0.142857	0	0.357143	3.07143	0.142857	0.434615	0.0138462	0.246923	0	0.681538	0.0138462
478	F	1	22	Crithidia	high	11	0	0	2019-11-22	High	UNinoc	6	9.46667	13.2	68.2	25594.6	375.287	1	0.0714286	0.571429	4	5	0.642857	0.105714	0.00928571	0.3	0.0314286	0.405714	0.0407143
479	F	1	26	UNinoc	high	29	1	2	26-29	High	UNinoc	6	12.6	13.3333	68.2	25594.6	375.287	1.5	0.214286	0.0714286	2.28571	3.78571	0.285714	0.0992857	0.015	0.153571	0.00428571	0.252857	0.0192857
480	F	1	17	UNinoc	high	17	0	0	17-17	High	UNinoc	6	9.2	11.2	68.2	25594.6	375.287	1.14286	0.214286	0.714286	2.14286	3.28571	0.928571	0.143846	0.0169231	0.222308	0.0623077	0.366154	0.0792308
481	F	1	22	Crithidia	high	18	0	0	22-18	High	UNinoc	6	9.46667	13.2	68.2	25594.6	375.287	1	0.0714286	0.571429	4	5	0.642857	0.105714	0.00928571	0.3	0.0314286	0.405714	0.0407143
482	F	1	24	SBPV	high	49	1	1	24-49	High	SBPV	6	14.8	15.4	68.2	25594.6	375.287	1.35714	0	NA	0.642857	2	NA	0.0764286	NA	0.0442857	NA	0.120714	NA
483	F	1	17	UNinoc	high	5	1	1	2019-05-17	High	UNinoc	6	9.2	11.2	68.2	25594.6	375.287	1.14286	0.214286	0.714286	2.14286	3.28571	0.928571	0.143846	0.0169231	0.222308	0.0623077	0.366154	0.0792308
484	F	1	26	UNinoc	high	38	0	0	26-38	High	UNinoc	6	12.6	13.3333	68.2	25594.6	375.287	1.5	0.214286	0.0714286	2.28571	3.78571	0.285714	0.0992857	0.015	0.153571	0.00428571	0.252857	0.0192857
485	F	1	3	UNinoc	high	20	0	0	2020-03-01	High	UNinoc	6	6.26667	6.6	68.2	25594.6	375.287	2.71429	0.142857	0	0.357143	3.07143	0.142857	0.434615	0.0138462	0.246923	0	0.681538	0.0138462
486	F	1	23	UNinoc	high	19	0	0	23-19	High	UNinoc	6	7.8	8.46667	68.2	25594.6	375.287	2.42857	0	0	0.714286	3.14286	0	0.231667	0	0.0758333	0	0.3075	0
487	F	2	22	Crithidia	high	33	0	0	22-33	High	UNinoc	6	9.46667	13.2	68.2	25594.6	375.287	1	0.0714286	0.571429	4	5	0.642857	0.105714	0.00928571	0.3	0.0314286	0.405714	0.0407143
488	F	2	17	UNinoc	high	13	0	0	17-13	High	UNinoc	6	9.2	11.2	68.2	25594.6	375.287	1.14286	0.214286	0.714286	2.14286	3.28571	0.928571	0.143846	0.0169231	0.222308	0.0623077	0.366154	0.0792308
489	F	2	26	UNinoc	high	8	1	1	2019-08-26	High	UNinoc	6	12.6	13.3333	68.2	25594.6	375.287	1.5	0.214286	0.0714286	2.28571	3.78571	0.285714	0.0992857	0.015	0.153571	0.00428571	0.252857	0.0192857
490	F	2	26	UNinoc	high	30	0	0	26-30	High	UNinoc	6	12.6	13.3333	68.2	25594.6	375.287	1.5	0.214286	0.0714286	2.28571	3.78571	0.285714	0.0992857	0.015	0.153571	0.00428571	0.252857	0.0192857
491	F	2	22	Crithidia	high	32	0	0	22-32	High	UNinoc	6	9.46667	13.2	68.2	25594.6	375.287	1	0.0714286	0.571429	4	5	0.642857	0.105714	0.00928571	0.3	0.0314286	0.405714	0.0407143
492	F	2	17	UNinoc	high	20	0	0	17-20	High	UNinoc	6	9.2	11.2	68.2	25594.6	375.287	1.14286	0.214286	0.714286	2.14286	3.28571	0.928571	0.143846	0.0169231	0.222308	0.0623077	0.366154	0.0792308
493	F	2	3	UNinoc	high	12	0	0	2019-12-03	High	UNinoc	6	6.26667	6.6	68.2	25594.6	375.287	2.71429	0.142857	0	0.357143	3.07143	0.142857	0.434615	0.0138462	0.246923	0	0.681538	0.0138462
494	F	2	22	Crithidia	high	36	0	0	22-36	High	UNinoc	6	9.46667	13.2	68.2	25594.6	375.287	1	0.0714286	0.571429	4	5	0.642857	0.105714	0.00928571	0.3	0.0314286	0.405714	0.0407143
495	F	2	3	UNinoc	high	21	0	0	2021-03-01	High	UNinoc	6	6.26667	6.6	68.2	25594.6	375.287	2.71429	0.142857	0	0.357143	3.07143	0.142857	0.434615	0.0138462	0.246923	0	0.681538	0.0138462
496	F	2	3	UNinoc	high	10	0	0	2019-10-03	High	UNinoc	6	6.26667	6.6	68.2	25594.6	375.287	2.71429	0.142857	0	0.357143	3.07143	0.142857	0.434615	0.0138462	0.246923	0	0.681538	0.0138462
497	F	2	23	UNinoc	high	8	0	0	2019-08-23	High	UNinoc	6	7.8	8.46667	68.2	25594.6	375.287	2.42857	0	0	0.714286	3.14286	0	0.231667	0	0.0758333	0	0.3075	0
498	F	2	26	UNinoc	high	17	0	0	26-17	High	UNinoc	6	12.6	13.3333	68.2	25594.6	375.287	1.5	0.214286	0.0714286	2.28571	3.78571	0.285714	0.0992857	0.015	0.153571	0.00428571	0.252857	0.0192857
499	F	3	22	Crithidia	high	37	1	1	22-37	High	UNinoc	6	9.46667	13.2	68.2	25594.6	375.287	1	0.0714286	0.571429	4	5	0.642857	0.105714	0.00928571	0.3	0.0314286	0.405714	0.0407143
500	F	3	17	UNinoc	high	15	1	1	17-15	High	UNinoc	6	9.2	11.2	68.2	25594.6	375.287	1.14286	0.214286	0.714286	2.14286	3.28571	0.928571	0.143846	0.0169231	0.222308	0.0623077	0.366154	0.0792308
501	F	3	3	UNinoc	high	15	0	0	2015-03-01	High	UNinoc	6	6.26667	6.6	68.2	25594.6	375.287	2.71429	0.142857	0	0.357143	3.07143	0.142857	0.434615	0.0138462	0.246923	0	0.681538	0.0138462
502	F	3	26	UNinoc	high	44	0	0	26-44	High	UNinoc	6	12.6	13.3333	68.2	25594.6	375.287	1.5	0.214286	0.0714286	2.28571	3.78571	0.285714	0.0992857	0.015	0.153571	0.00428571	0.252857	0.0192857
503	F	3	22	Crithidia	high	27	0	0	22-27	High	UNinoc	6	9.46667	13.2	68.2	25594.6	375.287	1	0.0714286	0.571429	4	5	0.642857	0.105714	0.00928571	0.3	0.0314286	0.405714	0.0407143
504	F	3	26	UNinoc	high	36	0	0	26-36	High	UNinoc	6	12.6	13.3333	68.2	25594.6	375.287	1.5	0.214286	0.0714286	2.28571	3.78571	0.285714	0.0992857	0.015	0.153571	0.00428571	0.252857	0.0192857
505	F	3	26	UNinoc	high	42	0	0	26-42	High	UNinoc	6	12.6	13.3333	68.2	25594.6	375.287	1.5	0.214286	0.0714286	2.28571	3.78571	0.285714	0.0992857	0.015	0.153571	0.00428571	0.252857	0.0192857
506	F	3	17	UNinoc	high	35	1	1	17-35	High	UNinoc	6	9.2	11.2	68.2	25594.6	375.287	1.14286	0.214286	0.714286	2.14286	3.28571	0.928571	0.143846	0.0169231	0.222308	0.0623077	0.366154	0.0792308
507	F	3	3	UNinoc	high	14	1	2	2014-03-01	High	UNinoc	6	6.26667	6.6	68.2	25594.6	375.287	2.71429	0.142857	0	0.357143	3.07143	0.142857	0.434615	0.0138462	0.246923	0	0.681538	0.0138462
508	F	4	17	UNinoc	high	32	1	1	17-32	High	UNinoc	6	9.2	11.2	68.2	25594.6	375.287	1.14286	0.214286	0.714286	2.14286	3.28571	0.928571	0.143846	0.0169231	0.222308	0.0623077	0.366154	0.0792308
509	F	4	3	UNinoc	high	22	1	2	2022-03-01	High	UNinoc	6	6.26667	6.6	68.2	25594.6	375.287	2.71429	0.142857	0	0.357143	3.07143	0.142857	0.434615	0.0138462	0.246923	0	0.681538	0.0138462
510	F	4	23	UNinoc	high	14	1	1	23-14	High	UNinoc	6	7.8	8.46667	68.2	25594.6	375.287	2.42857	0	0	0.714286	3.14286	0	0.231667	0	0.0758333	0	0.3075	0
511	F	4	23	UNinoc	high	12	0	0	2019-12-23	High	UNinoc	6	7.8	8.46667	68.2	25594.6	375.287	2.42857	0	0	0.714286	3.14286	0	0.231667	0	0.0758333	0	0.3075	0
512	F	4	22	Crithidia	high	10	1	1	2019-10-22	High	UNinoc	6	9.46667	13.2	68.2	25594.6	375.287	1	0.0714286	0.571429	4	5	0.642857	0.105714	0.00928571	0.3	0.0314286	0.405714	0.0407143
513	F	4	26	UNinoc	high	23	1	2	26-23	High	UNinoc	6	12.6	13.3333	68.2	25594.6	375.287	1.5	0.214286	0.0714286	2.28571	3.78571	0.285714	0.0992857	0.015	0.153571	0.00428571	0.252857	0.0192857
514	F	4	3	UNinoc	high	26	0	0	2026-03-01	High	UNinoc	6	6.26667	6.6	68.2	25594.6	375.287	2.71429	0.142857	0	0.357143	3.07143	0.142857	0.434615	0.0138462	0.246923	0	0.681538	0.0138462
515	F	4	22	Crithidia	high	22	0	0	22-22	High	UNinoc	6	9.46667	13.2	68.2	25594.6	375.287	1	0.0714286	0.571429	4	5	0.642857	0.105714	0.00928571	0.3	0.0314286	0.405714	0.0407143
516	F	4	26	UNinoc	high	39	0	0	26-39	High	UNinoc	6	12.6	13.3333	68.2	25594.6	375.287	1.5	0.214286	0.0714286	2.28571	3.78571	0.285714	0.0992857	0.015	0.153571	0.00428571	0.252857	0.0192857
517	F	4	26	UNinoc	high	37	1	1	26-37	High	UNinoc	6	12.6	13.3333	68.2	25594.6	375.287	1.5	0.214286	0.0714286	2.28571	3.78571	0.285714	0.0992857	0.015	0.153571	0.00428571	0.252857	0.0192857
518	F	5	23	UNinoc	high	29	1	1	23-29	High	UNinoc	6	7.8	8.46667	68.2	25594.6	375.287	2.42857	0	0	0.714286	3.14286	0	0.231667	0	0.0758333	0	0.3075	0
519	F	5	22	Crithidia	high	15	1	1	22-15	High	UNinoc	6	9.46667	13.2	68.2	25594.6	375.287	1	0.0714286	0.571429	4	5	0.642857	0.105714	0.00928571	0.3	0.0314286	0.405714	0.0407143
520	F	5	17	UNinoc	high	18	1	1	17-18	High	UNinoc	6	9.2	11.2	68.2	25594.6	375.287	1.14286	0.214286	0.714286	2.14286	3.28571	0.928571	0.143846	0.0169231	0.222308	0.0623077	0.366154	0.0792308
521	F	5	26	UNinoc	high	52	1	1	26-52	High	UNinoc	6	12.6	13.3333	68.2	25594.6	375.287	1.5	0.214286	0.0714286	2.28571	3.78571	0.285714	0.0992857	0.015	0.153571	0.00428571	0.252857	0.0192857
522	F	5	17	UNinoc	high	38	1	1	17-38	High	UNinoc	6	9.2	11.2	68.2	25594.6	375.287	1.14286	0.214286	0.714286	2.14286	3.28571	0.928571	0.143846	0.0169231	0.222308	0.0623077	0.366154	0.0792308
523	F	5	23	UNinoc	high	20	1	1	23-20	High	UNinoc	6	7.8	8.46667	68.2	25594.6	375.287	2.42857	0	0	0.714286	3.14286	0	0.231667	0	0.0758333	0	0.3075	0
524	F	5	17	UNinoc	high	30	1	2	17-30	High	UNinoc	6	9.2	11.2	68.2	25594.6	375.287	1.14286	0.214286	0.714286	2.14286	3.28571	0.928571	0.143846	0.0169231	0.222308	0.0623077	0.366154	0.0792308
525	F	5	26	UNinoc	high	34	1	1	26-34	High	UNinoc	6	12.6	13.3333	68.2	25594.6	375.287	1.5	0.214286	0.0714286	2.28571	3.78571	0.285714	0.0992857	0.015	0.153571	0.00428571	0.252857	0.0192857
526	F	5	26	UNinoc	high	50	1	1	26-50	High	UNinoc	6	12.6	13.3333	68.2	25594.6	375.287	1.5	0.214286	0.0714286	2.28571	3.78571	0.285714	0.0992857	0.015	0.153571	0.00428571	0.252857	0.0192857
527	F	5	3	UNinoc	high	30	1	1	1930-03-01	High	UNinoc	6	6.26667	6.6	68.2	25594.6	375.287	2.71429	0.142857	0	0.357143	3.07143	0.142857	0.434615	0.0138462	0.246923	0	0.681538	0.0138462
528	F	5	3	UNinoc	high	27	1	1	2027-03-01	High	UNinoc	6	6.26667	6.6	68.2	25594.6	375.287	2.71429	0.142857	0	0.357143	3.07143	0.142857	0.434615	0.0138462	0.246923	0	0.681538	0.0138462
529	F	5	22	Crithidia	high	4	1	1	2019-04-22	High	UNinoc	6	9.46667	13.2	68.2	25594.6	375.287	1	0.0714286	0.571429	4	5	0.642857	0.105714	0.00928571	0.3	0.0314286	0.405714	0.0407143
530	F	5	24	SBPV	high	51	1	3	24-51	High	SBPV	6	14.8	15.4	68.2	25594.6	375.287	1.35714	0	NA	0.642857	2	NA	0.0764286	NA	0.0442857	NA	0.120714	NA
531	F	5	24	SBPV	high	48	1	2	24-48	High	SBPV	6	14.8	15.4	68.2	25594.6	375.287	1.35714	0	NA	0.642857	2	NA	0.0764286	NA	0.0442857	NA	0.120714	NA
532	F	6	17	UNinoc	high	43	1	2	17-43	High	UNinoc	6	9.2	11.2	68.2	25594.6	375.287	1.14286	0.214286	0.714286	2.14286	3.28571	0.928571	0.143846	0.0169231	0.222308	0.0623077	0.366154	0.0792308
533	F	6	17	UNinoc	high	48	1	3	17-48	High	UNinoc	6	9.2	11.2	68.2	25594.6	375.287	1.14286	0.214286	0.714286	2.14286	3.28571	0.928571	0.143846	0.0169231	0.222308	0.0623077	0.366154	0.0792308
534	F	6	23	UNinoc	high	17	1	1	23-17	High	UNinoc	6	7.8	8.46667	68.2	25594.6	375.287	2.42857	0	0	0.714286	3.14286	0	0.231667	0	0.0758333	0	0.3075	0
535	F	6	24	SBPV	high	68	1	2	24-68	High	SBPV	6	14.8	15.4	68.2	25594.6	375.287	1.35714	0	NA	0.642857	2	NA	0.0764286	NA	0.0442857	NA	0.120714	NA
536	F	6	22	Crithidia	high	5	1	1	2019-05-22	High	UNinoc	6	9.46667	13.2	68.2	25594.6	375.287	1	0.0714286	0.571429	4	5	0.642857	0.105714	0.00928571	0.3	0.0314286	0.405714	0.0407143
537	F	6	24	SBPV	high	65	1	3	24-65	High	SBPV	6	14.8	15.4	68.2	25594.6	375.287	1.35714	0	NA	0.642857	2	NA	0.0764286	NA	0.0442857	NA	0.120714	NA
538	F	6	24	SBPV	high	66	1	3	24-66	High	SBPV	6	14.8	15.4	68.2	25594.6	375.287	1.35714	0	NA	0.642857	2	NA	0.0764286	NA	0.0442857	NA	0.120714	NA
539	F	6	23	UNinoc	high	15	1	1	23-15	High	UNinoc	6	7.8	8.46667	68.2	25594.6	375.287	2.42857	0	0	0.714286	3.14286	0	0.231667	0	0.0758333	0	0.3075	0
540	F	6	26	UNinoc	high	47	0	0	26-47	High	UNinoc	6	12.6	13.3333	68.2	25594.6	375.287	1.5	0.214286	0.0714286	2.28571	3.78571	0.285714	0.0992857	0.015	0.153571	0.00428571	0.252857	0.0192857
541	F	6	26	UNinoc	high	55	0	0	26-55	High	UNinoc	6	12.6	13.3333	68.2	25594.6	375.287	1.5	0.214286	0.0714286	2.28571	3.78571	0.285714	0.0992857	0.015	0.153571	0.00428571	0.252857	0.0192857
542	F	6	22	Crithidia	high	1	0	0	2019-01-22	High	UNinoc	6	9.46667	13.2	68.2	25594.6	375.287	1	0.0714286	0.571429	4	5	0.642857	0.105714	0.00928571	0.3	0.0314286	0.405714	0.0407143
543	F	6	24	SBPV	high	58	1	3	24-58	High	SBPV	6	14.8	15.4	68.2	25594.6	375.287	1.35714	0	NA	0.642857	2	NA	0.0764286	NA	0.0442857	NA	0.120714	NA
544	F	7	22	Crithidia	high	6	0	0	2019-06-22	High	UNinoc	6	9.46667	13.2	68.2	25594.6	375.287	1	0.0714286	0.571429	4	5	0.642857	0.105714	0.00928571	0.3	0.0314286	0.405714	0.0407143
545	F	7	24	SBPV	high	2	1	1	2019-02-24	High	SBPV	6	14.8	15.4	68.2	25594.6	375.287	1.35714	0	NA	0.642857	2	NA	0.0764286	NA	0.0442857	NA	0.120714	NA
546	F	7	26	UNinoc	high	40	0	0	26-40	High	UNinoc	6	12.6	13.3333	68.2	25594.6	375.287	1.5	0.214286	0.0714286	2.28571	3.78571	0.285714	0.0992857	0.015	0.153571	0.00428571	0.252857	0.0192857
547	F	7	26	UNinoc	high	27	1	2	26-27	High	UNinoc	6	12.6	13.3333	68.2	25594.6	375.287	1.5	0.214286	0.0714286	2.28571	3.78571	0.285714	0.0992857	0.015	0.153571	0.00428571	0.252857	0.0192857
548	F	7	22	Crithidia	high	2	1	1	2019-02-22	High	UNinoc	6	9.46667	13.2	68.2	25594.6	375.287	1	0.0714286	0.571429	4	5	0.642857	0.105714	0.00928571	0.3	0.0314286	0.405714	0.0407143
549	F	7	26	UNinoc	high	54	0	0	26-54	High	UNinoc	6	12.6	13.3333	68.2	25594.6	375.287	1.5	0.214286	0.0714286	2.28571	3.78571	0.285714	0.0992857	0.015	0.153571	0.00428571	0.252857	0.0192857
550	F	7	22	Crithidia	high	38	0	0	22-38	High	UNinoc	6	9.46667	13.2	68.2	25594.6	375.287	1	0.0714286	0.571429	4	5	0.642857	0.105714	0.00928571	0.3	0.0314286	0.405714	0.0407143
551	F	7	24	SBPV	high	71	1	1	24-71	High	SBPV	6	14.8	15.4	68.2	25594.6	375.287	1.35714	0	NA	0.642857	2	NA	0.0764286	NA	0.0442857	NA	0.120714	NA

## Sheet: Bailesetal_datafile7_ESM.csv
DateofSample	SamplePoint	Colony	Treatment	TreatmentUI	Compartment	BeesFromCol	CritCol	SBPVcol	Recipient1	Recipient2	Recipient3	Recipient4	perFROMcrit	perFROMsbpv	perFROMrecip	perFROMany	perTOcrit	perTOsbpv	perTOrecip	perTOany	Total _col_size	Total_drifters_in_col	pDrifters
2017-06-13	1	9	Crithidia	Crithidia	A	16	na	0	0	na	na	na	na	0	0	0	na	0.11	0	0.11	18	0	0
2017-06-13	1	20	uninoc	Recipient 1	A	13	0	0	na	na	na	na	0	0	0	0	0	0	na	0	13	0	0
2017-06-13	1	8	SBPV	SBPV	A	13	2	na	0	na	na	na	0.13	na	0	0.13	0	na	0	0	13	2	0.133333
2017-06-13	1	7	Crithidia	Crithidia	B	14	na	2	3	0	0	0	na	0.11	0.16	0.26	na	0	0.11	0.18	17	5	0.263158
2017-06-13	1	4	uninoc	Recipient 1	B	12	2	0	na	0	1	0	0.13	0	0.07	0.2	0.2	0	0	0.2	15	3	0.2
2017-06-13	1	5	uninoc	Recipient 2	B	12	0	1	0	na	0	0	0	0.08	0	0.08	0	0.06	0.19	0.25	16	1	0.0769231
2017-06-13	1	37	uninoc	Recipient 3	B	10	0	0	0	0	na	0	0	0	0	0	0	0	0.09	0.09	11	0	0
2017-06-13	1	12	uninoc	Recipient 4	B	14	1	1	0	3	0	na	0.05	0.05	0.16	0.26	0	0	0	0	14	5	0.263158
2017-06-13	1	32	SBPV	SBPV	B	7	0	na	0	1	0	0	0	na	0.13	0.13	0.18	na	0.18	0.36	11	1	0.125
2017-06-13	1	6	Crithidia	Crithidia	C	20	na	1	1	na	na	na	na	0.05	0.05	0.09	na	0	0	0	20	2	0.0909091
2017-06-13	1	10	uninoc	Recipient 1	C	11	0	0	na	na	na	na	0	0	0	0	0.08	0	na	0.08	12	0	0
2017-06-13	1	11	SBPV	SBPV	C	14	0	na	0	na	na	na	0	na	0	0	0.07	na	0	0.07	15	0	0
2017-06-13	1	29	Crithidia	Crithidia	D	18	na	0	0	0	0	0	na	0	0	0	na	0	0	0.05	19	0	0
2017-06-13	1	13	uninoc	Recipient 1	D	13	0	0	na	0	2	1	0	0	0.19	0.19	0	0	0.07	0.07	14	3	0.1875
2017-06-13	1	14	uninoc	Recipient 2	D	15	1	0	1	na	1	0	0.06	0	0.11	0.17	0	0	0	0	15	3	0.166667
2017-06-13	1	15	uninoc	Recipient 3	D	19	0	0	0	0	na	0	0	0	0	0	0	0	0.14	0.14	22	0	0
2017-06-13	1	16	uninoc	Recipient 4	D	17	0	0	0	0	0	na	0	0	0	0	0	0	0.06	0.06	18	0	0
2017-06-13	1	30	SBPV	SBPV	D	18	0	na	0	0	0	0	0	na	0	0	0	na	0	0	18	0	0
2017-06-13	1	28	Crithidia	Crithidia	E	8	na	1	0	na	na	na	na	0.11	0	0.11	na	0.1	0.1	0.2	10	1	0.111111
2017-06-13	1	19	uninoc	Recipient 1	E	14	1	0	na	na	na	na	0.07	0	0	0.07	0	0	na	0	14	1	0.0666667
2017-06-13	1	35	SBPV	SBPV	E	11	1	na	0	na	na	na	0.08	na	0	0.08	0.08	na	0	0.08	12	1	0.0833333
2017-06-13	1	22	Crithidia	Crithidia	F	12	na	0	0	0	0	0	na	0	0	0	na	0	0.14	0.08	13	0	0
2017-06-13	1	3	uninoc	Recipient 1	F	8	0	1	na	0	0	0	0	0.11	0	0.11	0	0	0	0	8	1	0.111111
2017-06-13	1	17	uninoc	Recipient 2	F	10	0	1	0	na	0	1	0	0.08	0.08	0.17	0	0.09	0	0.09	11	2	0.166667
2017-06-13	1	23	uninoc	Recipient 3	F	11	1	0	0	0	na	1	0.08	0	0.08	0.15	0	0	0.08	0.08	12	2	0.153846
2017-06-13	1	26	uninoc	Recipient 4	F	11	0	0	0	0	1	na	0	0	0.08	0.08	0	0	0.15	0.15	13	1	0.0833333
2017-06-13	1	24	SBPV	SBPV	F	11	0	na	0	1	0	0	0	na	0.08	0.08	0	na	0.15	0.15	13	1	0.0833333
2017-06-15	2	9	Crithidia	Crithidia	A	17	na	0	0	na	na	na	na	0	0	0	na	0	0	0	17	0	0
2017-06-15	2	20	uninoc	Recipient 1	A	20	0	0	na	na	na	na	0	0	0	0	0	0	na	0	20	0	0
2017-06-15	2	8	SBPV	SBPV	A	10	0	na	0	na	na	na	0	na	0	0	0	na	0	0	10	0	0
2017-06-15	2	7	Crithidia	Crithidia	B	13	na	1	2	0	0	0	na	0.06	0.13	0.19	na	0	0.22	0.19	16	3	0.1875
2017-06-15	2	4	uninoc	Recipient 1	B	12	1	0	na	0	0	0	0.08	0	0	0.08	0.13	0	0.13	0.25	16	1	0.0769231
2017-06-15	2	5	uninoc	Recipient 2	B	11	1	0	1	na	1	0	0.07	0	0.14	0.21	0	0	0.21	0.21	14	3	0.214286
2017-06-15	2	37	uninoc	Recipient 3	B	9	0	0	0	0	na	0	0	0	0	0	0	0	0.18	0.18	11	0	0
2017-06-15	2	12	uninoc	Recipient 4	B	10	1	4	1	3	1	na	0.05	0.2	0.25	0.5	0	0	0	0	10	10	0.5
2017-06-15	2	32	SBPV	SBPV	B	6	0	na	0	0	0	0	0	na	0	0	0.09	na	0.36	0.45	11	0	0
2017-06-15	2	6	Crithidia	Crithidia	C	13	na	0	0	na	na	na	na	0	0	0	na	0.07	0	0.07	14	0	0
2017-06-15	2	10	uninoc	Recipient 1	C	13	0	1	na	na	na	na	0	0.07	0	0.07	0	0	na	0	13	1	0.0714286
2017-06-15	2	11	SBPV	SBPV	C	15	1	na	0	na	na	na	0.06	na	0	0.06	0	na	0.06	0.06	16	1	0.0625
2017-06-15	2	29	Crithidia	Crithidia	D	22	na	0	1	0	0	0	na	0	0.04	0.04	na	0	0.04	0.04	23	1	0.0434783
2017-06-15	2	13	uninoc	Recipient 1	D	14	0	0	na	0	1	2	0	0	0.18	0.18	0.06	0	0.12	0.18	17	3	0.176471
2017-06-15	2	14	uninoc	Recipient 2	D	15	0	1	1	na	2	0	0	0.05	0.16	0.21	0	0	0.06	0.06	16	4	0.210526
2017-06-15	2	15	uninoc	Recipient 3	D	22	1	0	0	1	na	0	0.04	0	0.04	0.08	0	0.07	0.11	0.19	27	2	0.0833333
2017-06-15	2	16	uninoc	Recipient 4	D	15	0	0	1	0	0	na	0	0	0.06	0.06	0	0	0.12	0.12	17	1	0.0625
2017-06-15	2	30	SBPV	SBPV	D	17	0	na	0	0	2	0	0	na	0.11	0.11	0	na	0.06	0.06	18	2	0.105263
2017-06-15	2	28	Crithidia	Crithidia	E	11	na	1	0	na	na	na	na	0.08	0	0.08	na	0	0.08	0.08	12	1	0.0833333
2017-06-15	2	19	uninoc	Recipient 1	E	16	1	0	na	na	na	na	0.06	0	0	0.06	0	0	na	0	16	1	0.0588235
2017-06-15	2	35	SBPV	SBPV	E	14	0	na	0	na	na	na	0	na	0	0	0.07	na	0	0.07	15	0	0
2017-06-15	2	22	Crithidia	Crithidia	F	11	na	0	0	0	0	1	na	0	0.08	0.08	na	0	0	0.27	15	1	0.0833333
2017-06-15	2	3	uninoc	Recipient 1	F	10	1	0	na	0	0	0	0.09	0	0	0.09	0	0	0	0	10	1	0.0909091
2017-06-15	2	17	uninoc	Recipient 2	F	12	0	0	0	na	0	0	0	0	0	0	0	0.13	0.07	0.2	15	0	0
2017-06-15	2	23	uninoc	Recipient 3	F	9	1	0	0	1	na	0	0.09	0	0.09	0.18	0	0	0.1	0.1	10	2	0.181818
2017-06-15	2	26	uninoc	Recipient 4	F	14	2	0	0	0	1	na	0.12	0	0.06	0.18	0.07	0	0	0.07	15	3	0.176471
2017-06-15	2	24	SBPV	SBPV	F	15	0	na	0	2	0	0	0	na	0.12	0.12	0	na	0	0	15	2	0.117647
2017-06-17	3	9	Crithidia	Crithidia	A	20	na	0	0	na	na	na	na	0	0	0	na	0.09	0.04	0.13	23	0	0
2017-06-17	3	20	uninoc	Recipient 1	A	20	1	0	na	na	na	na	0.05	0	0	0.05	0	0	na	0	20	1	0.047619
2017-06-17	3	8	SBPV	SBPV	A	13	2	na	0	na	na	na	0.13	na	0	0.13	0	na	0	0	13	2	0.133333
2017-06-17	3	7	Crithidia	Crithidia	B	13	na	1	2	1	0	0	na	0.06	0.18	0.24	na	0	0.13	0.24	17	4	0.235294
2017-06-17	3	4	uninoc	Recipient 1	B	13	2	0	na	1	0	0	0.13	0	0.06	0.19	0.11	0	0.21	0.32	19	3	0.1875
2017-06-17	3	5	uninoc	Recipient 2	B	15	1	1	1	na	1	0	0.05	0.05	0.11	0.21	0.05	0	0.2	0.25	20	4	0.210526
2017-06-17	3	37	uninoc	Recipient 3	B	11	0	0	0	0	na	0	0	0	0	0	0	0	0.15	0.15	13	0	0
2017-06-17	3	12	uninoc	Recipient 4	B	10	1	1	3	3	1	na	0.05	0.05	0.37	0.47	0	0	0	0	10	9	0.473684
2017-06-17	3	32	SBPV	SBPV	B	11	0	na	0	0	0	0	0	na	0	0	0.07	na	0.14	0.21	14	0	0
2017-06-17	3	6	Crithidia	Crithidia	C	18	na	0	0	na	na	na	na	0	0	0	na	0.05	0	0.05	19	0	0
2017-06-17	3	10	uninoc	Recipient 1	C	20	0	3	na	na	na	na	0	0.13	0	0.13	0	0	na	0	20	3	0.130435
2017-06-17	3	11	SBPV	SBPV	C	21	1	na	0	na	na	na	0.05	na	0	0.05	0	na	0.13	0.13	24	1	0.0454545
2017-06-17	3	29	Crithidia	Crithidia	D	20	na	0	0	0	0	0	na	0	0	0	na	0	0.09	0	20	0	0
2017-06-17	3	13	uninoc	Recipient 1	D	11	0	0	na	0	1	0	0	0	0.08	0.08	0	0	0.21	0.21	14	1	0.0833333
2017-06-17	3	14	uninoc	Recipient 2	D	12	0	1	1	na	3	0	0	0.06	0.24	0.29	0	0	0.14	0.14	14	5	0.294118
2017-06-17	3	15	uninoc	Recipient 3	D	25	0	1	1	2	na	2	0	0.03	0.16	0.19	0	0.09	0.15	0.24	33	6	0.193548
2017-06-17	3	16	uninoc	Recipient 4	D	12	0	0	1	0	1	na	0	0	0.14	0.14	0	0	0.14	0.14	14	2	0.142857
2017-06-17	3	30	SBPV	SBPV	D	14	0	na	0	0	3	0	0	na	0.18	0.18	0	na	0.13	0.13	16	3	0.176471
2017-06-17	3	22	Crithidia	Crithidia	F	11	na	0	0	0	2	1	na	0	0.21	0.21	na	0.2	0	0.45	20	3	0.214286
2017-06-17	3	3	uninoc	Recipient 1	F	8	3	0	na	2	0	0	0.23	0	0.15	0.38	0	0	0	0	8	5	0.384615
2017-06-17	3	17	uninoc	Recipient 2	F	8	0	0	0	na	0	0	0	0	0	0	0	0.17	0.17	0.33	12	0	0
2017-06-17	3	23	uninoc	Recipient 3	F	13	0	0	0	0	na	1	0	0	0.07	0.07	0.13	0	0.06	0.19	16	1	0.0714286
2017-06-17	3	26	uninoc	Recipient 4	F	14	2	0	0	0	1	na	0.12	0	0.06	0.18	0.06	0.06	0.06	0.18	17	3	0.176471
2017-06-17	3	24	SBPV	SBPV	F	17	4	na	0	2	0	1	0.17	na	0.13	0.29	0	na	0	0	17	7	0.291667
2017-06-17	3	28	Crithidia	Crithidia	E	12	na	2	1	na	na	na	na	0.13	0.07	0.2	na	0	0	0	12	3	0.2
2017-06-17	3	19	uninoc	Recipient 1	E	16	0	0	na	na	na	na	0	0	0	0	0.06	0	0	0.06	17	0	0
2017-06-17	3	35	SBPV	SBPV	E	11	0	na	0	na	na	na	0	na	0	0	0.15	na	0	0.15	13	0	0
2017-06-19	4	9	Crithidia	Crithidia	A	21	na	0	0	na	na	na	na	0	0	0	na	0.04	0.04	0.09	23	0	0
2017-06-19	4	20	uninoc	Recipient 1	A	25	1	0	na	na	na	na	0.04	0	0	0.04	0	0	na	0	25	1	0.0384615
2017-06-19	4	8	SBPV	SBPV	A	15	1	na	0	na	na	na	0.06	na	0	0.06	0	na	0	0	15	1	0.0625
2017-06-19	4	7	Crithidia	Crithidia	B	14	na	1	3	1	0	0	na	0.05	0.21	0.26	na	0	0.12	0.18	17	5	0.263158
2017-06-19	4	4	uninoc	Recipient 1	B	12	1	1	na	3	0	0	0.06	0.06	0.18	0.29	0.17	0	0.17	0.33	18	5	0.294118
2017-06-19	4	5	uninoc	Recipient 2	B	10	1	1	1	na	1	1	0.07	0.07	0.2	0.33	0.07	0	0.27	0.33	15	5	0.333333
2017-06-19	4	37	uninoc	Recipient 3	B	16	1	0	0	0	na	0	0.06	0	0	0.06	0	0	0.06	0.06	17	1	0.0588235
2017-06-19	4	12	uninoc	Recipient 4	B	11	0	0	2	1	0	na	0	0	0.21	0.21	0	0	0.08	0.08	12	3	0.214286
2017-06-19	4	32	SBPV	SBPV	B	10	0	na	0	0	0	0	0	na	0	0	0.08	na	0.15	0.23	13	0	0
2017-06-19	4	6	Crithidia	Crithidia	C	15	na	0	0	na	na	na	na	0	0	0	na	0	0.06	0.06	16	0	0
2017-06-19	4	10	uninoc	Recipient 1	C	14	1	2	na	na	na	na	0.06	0.12	0	0.18	0	0	na	0	14	3	0.176471
2017-06-19	4	11	SBPV	SBPV	C	25	0	na	0	na	na	na	0	na	0	0	0	na	0.07	0.07	27	0	0
2017-06-19	4	29	Crithidia	Crithidia	D	23	na	0	0	0	0	0	na	0	0	0	na	0	0.08	0.04	24	0	0
2017-06-19	4	13	uninoc	Recipient 1	D	9	1	1	na	0	0	1	0.08	0.08	0.08	0.25	0	0	0.25	0.25	12	3	0.25
2017-06-19	4	14	uninoc	Recipient 2	D	8	0	0	0	na	1	2	0	0	0.27	0.27	0	0	0.11	0.11	9	3	0.272727
2017-06-19	4	15	uninoc	Recipient 3	D	28	0	0	1	1	na	0	0	0	0.07	0.07	0	0.03	0.06	0.1	31	2	0.0666667
2017-06-19	4	16	uninoc	Recipient 4	D	11	0	1	2	0	1	na	0	0.07	0.2	0.27	0	0.07	0.2	0.27	15	4	0.266667
2017-06-19	4	30	SBPV	SBPV	D	20	0	na	0	0	1	1	0	na	0.09	0.09	0	na	0.09	0.09	22	2	0.0909091
2017-06-19	4	28	Crithidia	Crithidia	E	8	na	1	1	na	na	na	na	0.1	0.1	0.2	na	0	0	0	8	2	0.2
2017-06-19	4	19	uninoc	Recipient 1	E	18	0	0	na	na	na	na	0	0	0	0	0.05	0	na	0.05	19	0	0
2017-06-19	4	35	SBPV	SBPV	E	11	0	na	0	na	na	na	0	na	0	0	0.08	na	0	0.08	12	0	0
2017-06-19	4	22	Crithidia	Crithidia	F	14	na	0	0	0	0	1	na	0	0.07	0.07	na	0.06	0.07	0.18	17	1	0.0666667
2017-06-19	4	3	uninoc	Recipient 1	F	11	1	1	na	1	1	0	0.07	0.07	0.13	0.27	0	0	0.08	0.08	12	4	0.266667
2017-06-19	4	17	uninoc	Recipient 2	F	11	0	0	0	na	0	0	0	0	0	0	0	0.08	0.08	0.15	13	0	0
2017-06-19	4	23	uninoc	Recipient 3	F	8	0	0	0	0	na	0	0	0	0	0	0	0	0.11	0.11	9	0	0
2017-06-19	4	26	uninoc	Recipient 4	F	11	1	0	1	0	0	na	0.08	0	0.08	0.15	0.08	0	0	0.08	12	2	0.153846
2017-06-19	4	24	SBPV	SBPV	F	15	1	na	0	1	0	0	0.06	na	0.06	0.12	0	na	0.06	0.06	16	2	0.117647
2017-06-21	5	9	Crithidia	Crithidia	A	14	na	0	0	na	na	na	na	0	0	0	na	0	0.07	0.07	15	0	0
2017-06-21	5	20	uninoc	Recipient 1	A	17	1	0	na	na	na	na	0.06	0	0	0.06	0	0	na	0	17	1	0.0555556
2017-06-21	5	8	SBPV	SBPV	A	13	0	na	0	na	na	na	0	na	0	0	0	na	0	0	13	0	0
2017-06-21	5	7	Crithidia	Crithidia	B	14	na	0	1	1	0	0	na	0	0.13	0.13	na	0	0.18	0.18	17	2	0.125
2017-06-21	5	4	uninoc	Recipient 1	B	10	1	1	na	2	0	0	0.07	0.07	0.14	0.29	0.06	0	0.31	0.38	16	4	0.285714
2017-06-21	5	5	uninoc	Recipient 2	B	12	1	2	2	na	0	0	0.06	0.12	0.12	0.29	0.05	0	0.35	0.4	20	5	0.294118
2017-06-21	5	37	uninoc	Recipient 3	B	13	0	0	0	0	na	0	0	0	0	0	0	0	0	0	13	0	0
2017-06-21	5	12	uninoc	Recipient 4	B	11	1	0	3	5	0	na	0.05	0	0.4	0.45	0	0	0	0	11	9	0.45
2017-06-21	5	32	SBPV	SBPV	B	12	0	na	0	0	0	0	0	na	0	0	0	na	0.2	0.2	15	0	0
2017-06-21	5	6	Crithidia	Crithidia	C	17	na	0	0	na	na	na	na	0	0	0	na	0.06	0	0.06	18	0	0
2017-06-21	5	10	uninoc	Recipient 1	C	20	0	3	na	na	na	na	0	0.13	0	0.13	0	0	na	0	20	3	0.130435
2017-06-21	5	11	SBPV	SBPV	C	19	1	na	0	na	na	na	0.05	na	0	0.05	0	na	0.14	0.14	22	1	0.05
2017-06-21	5	29	Crithidia	Crithidia	D	24	na	0	0	0	0	0	na	0	0	0	na	0	0	0.04	25	0	0
2017-06-21	5	13	uninoc	Recipient 1	D	6	1	0	na	0	1	0	0.13	0	0.13	0.25	0	0	0.4	0.4	10	2	0.25
2017-06-21	5	14	uninoc	Recipient 2	D	11	0	0	1	na	1	0	0	0	0.15	0.15	0	0	0.08	0.08	12	2	0.153846
2017-06-21	5	15	uninoc	Recipient 3	D	25	0	0	3	1	na	0	0	0	0.14	0.14	0	0.07	0.1	0.17	30	4	0.137931
2017-06-21	5	16	uninoc	Recipient 4	D	12	0	0	0	0	1	na	0	0	0.08	0.08	0	0.14	0	0.14	14	1	0.0769231
2017-06-21	5	30	SBPV	SBPV	D	24	0	na	0	0	2	2	0	na	0.14	0.14	0	na	0	0	24	4	0.142857
2017-06-21	5	28	Crithidia	Crithidia	E	11	na	2	0	na	na	na	na	0.15	0	0.15	na	0	0	0	11	2	0.153846
2017-06-21	5	19	uninoc	Recipient 1	E	17	0	0	na	na	na	na	0	0	0	0	0	0	na	0	17	0	0
2017-06-21	5	35	SBPV	SBPV	E	8	0	na	0	na	na	na	0	na	0	0	0.2	na	0	0.2	10	0	0
2017-06-21	5	22	Crithidia	Crithidia	F	12	na	0	1	0	0	1	na	0	0.14	0.14	na	0.07	0	0.2	15	2	0.142857
2017-06-21	5	3	uninoc	Recipient 1	F	7	1	0	na	1	0	0	0.11	0	0.11	0.22	0.13	0	0	0.13	8	2	0.222222
2017-06-21	5	17	uninoc	Recipient 2	F	10	0	0	0	na	0	0	0	0	0	0	0	0.08	0.08	0.17	12	0	0
2017-06-21	5	23	uninoc	Recipient 3	F	11	1	0	0	0	na	1	0.08	0	0.08	0.15	0	0	0	0	11	2	0.153846
2017-06-21	5	26	uninoc	Recipient 4	F	10	0	0	0	0	0	na	0	0	0	0	0.08	0	0.08	0.17	12	0	0
2017-06-21	5	24	SBPV	SBPV	F	12	1	na	0	1	0	0	0.07	na	0.07	0.14	0	na	0	0	12	2	0.142857
2017-06-23	6	9	Crithidia	Crithidia	A	20	na	0	1	na	na	na	na	0	0.05	0.05	na	0	0.05	0.05	21	1	0.047619
2017-06-23	6	20	uninoc	Recipient 1	A	23	1	0	na	na	na	na	0.04	0	0	0.04	0.04	0.04	na	0.08	25	1	0.0416667
2017-06-23	6	8	SBPV	SBPV	A	7	0	na	1	na	na	na	0	na	0.13	0.13	0	na	0	0	7	1	0.125
2017-06-23	6	7	Crithidia	Crithidia	B	15	na	1	1	0	0	0	na	0.06	0.06	0.12	na	0	0.06	0.12	17	2	0.117647
2017-06-23	6	4	uninoc	Recipient 1	B	10	1	1	na	2	0	0	0.07	0.07	0.14	0.29	0.06	0	0.31	0.38	16	4	0.285714
2017-06-23	6	5	uninoc	Recipient 2	B	12	0	0	0	na	1	1	0	0	0.14	0.14	0	0	0.29	0.29	17	2	0.142857
2017-06-23	6	37	uninoc	Recipient 3	B	10	0	0	1	1	na	0	0	0	0.17	0.17	0	0	0.17	0.17	12	2	0.166667
2017-06-23	6	12	uninoc	Recipient 4	B	8	1	0	4	2	1	na	0.06	0	0.44	0.5	0	0	0.11	0.11	9	8	0.5
2017-06-23	6	32	SBPV	SBPV	B	11	0	na	0	0	0	0	0	na	0	0	0.08	na	0.08	0.15	13	0	0
2017-06-23	6	6	Crithidia	Crithidia	C	14	na	0	0	na	na	na	na	0	0	0	na	0.07	0	0.07	15	0	0
2017-06-23	6	10	uninoc	Recipient 1	C	18	0	2	na	na	na	na	0	0.1	0	0.1	0	0	na	0	18	2	0.1
2017-06-23	6	11	SBPV	SBPV	C	21	1	na	0	na	na	na	0.05	na	0	0.05	0	na	0.09	0.09	23	1	0.0454545
2017-06-23	6	29	Crithidia	Crithidia	D	22	na	0	0	0	0	0	na	0	0	0	na	0	0	0.04	23	0	0
2017-06-23	6	13	uninoc	Recipient 1	D	13	1	0	na	1	0	0	0.07	0	0.07	0.13	0	0	0.19	0.19	16	2	0.133333
2017-06-23	6	14	uninoc	Recipient 2	D	11	0	0	2	na	2	0	0	0	0.27	0.27	0	0	0.08	0.08	12	4	0.266667
2017-06-23	6	15	uninoc	Recipient 3	D	22	0	0	0	0	na	0	0	0	0	0	0	0.04	0.12	0.15	26	0	0
2017-06-23	6	16	uninoc	Recipient 4	D	10	0	0	1	0	1	na	0	0	0.17	0.17	0	0.09	0	0.09	11	2	0.166667
2017-06-23	6	30	SBPV	SBPV	D	20	0	na	0	0	1	1	0	na	0.09	0.09	0	na	0	0	20	2	0.0909091
2017-06-23	6	28	Crithidia	Crithidia	E	12	na	2	2	na	na	na	na	0.13	0.13	0.25	na	0	0	0	12	4	0.25
2017-06-23	6	19	uninoc	Recipient 1	E	20	0	0	na	na	na	na	0	0	0	0	0.09	0	na	0.09	22	0	0
2017-06-23	6	35	SBPV	SBPV	E	13	0	na	0	na	na	na	0	na	0	0	0.13	na	0	0.13	15	0	0
2017-06-23	6	22	Crithidia	Crithidia	F	11	na	0	0	0	1	0	na	0	0.08	0.08	na	0.11	0	0.39	18	1	0.0833333
2017-06-23	6	3	uninoc	Recipient 1	F	10	1	0	na	2	1	0	0.07	0	0.21	0.29	0	0	0	0	10	4	0.285714
2017-06-23	6	17	uninoc	Recipient 2	F	16	1	0	0	na	0	0	0.06	0	0	0.06	0	0	0.11	0.11	18	1	0.0588235
2017-06-23	6	23	uninoc	Recipient 3	F	9	2	0	0	0	na	2	0.15	0	0.15	0.31	0.09	0	0.09	0.18	11	4	0.307692
2017-06-23	6	26	uninoc	Recipient 4	F	13	1	0	0	0	0	na	0.07	0	0	0.07	0	0	0.13	0.13	15	1	0.0714286
2017-06-23	6	24	SBPV	SBPV	F	15	2	na	0	0	0	0	0.12	na	0	0.12	0	na	0	0	15	2	0.117647
2017-06-25	7	9	Crithidia	Crithidia	A	12	na	0	3	na	na	na	na	0	0.2	0.2	na	0.2	0	0.2	15	3	0.2
2017-06-25	7	20	uninoc	Recipient 1	A	18	0	0	na	na	na	na	0	0	0	0	0.14	0	na	0.14	21	0	0
2017-06-25	7	8	SBPV	SBPV	A	11	3	na	0	na	na	na	0.21	na	0	0.21	0	na	0	0	11	3	0.214286
2017-06-25	7	7	Crithidia	Crithidia	B	10	na	0	2	0	0	0	na	0	0.17	0.17	na	0	0.29	0.29	14	2	0.166667
2017-06-25	7	4	uninoc	Recipient 1	B	13	3	1	na	1	0	2	0.15	0.05	0.15	0.35	0.11	0	0.21	0.32	19	7	0.35
2017-06-25	7	5	uninoc	Recipient 2	B	7	0	3	0	na	2	1	0	0.23	0.23	0.46	0	0	0.42	0.42	12	6	0.461538
2017-06-25	7	37	uninoc	Recipient 3	B	10	0	0	1	0	na	0	0	0	0.09	0.09	0	0	0.23	0.23	13	1	0.0909091
2017-06-25	7	12	uninoc	Recipient 4	B	10	1	0	3	4	1	na	0.05	0	0.42	0.47	0	0	0.23	0.23	13	9	0.473684
2017-06-25	7	32	SBPV	SBPV	B	10	0	na	0	0	0	0	0	na	0	0	0	na	0.29	0.29	14	0	0
2017-06-25	7	6	Crithidia	Crithidia	C	10	na	1	0	na	na	na	na	0.09	0	0.09	na	0.15	0.08	0.23	13	1	0.0909091
2017-06-25	7	10	uninoc	Recipient 1	C	20	1	2	na	na	na	na	0.04	0.09	0	0.13	0	0	na	0	20	3	0.130435
2017-06-25	7	11	SBPV	SBPV	C	20	2	na	0	na	na	na	0.09	na	0	0.09	0.04	na	0.09	0.13	23	2	0.0909091
2017-06-25	7	29	Crithidia	Crithidia	D	21	na	0	0	0	0	0	na	0	0	0	na	0	0.22	0.09	23	0	0
2017-06-25	7	13	uninoc	Recipient 1	D	5	0	2	na	0	0	0	0	0.29	0	0.29	0	0	0.44	0.44	9	2	0.285714
2017-06-25	7	14	uninoc	Recipient 2	D	6	0	0	1	na	2	1	0	0	0.4	0.4	0	0	0.25	0.25	8	4	0.4
2017-06-25	7	15	uninoc	Recipient 3	D	21	0	4	2	2	na	0	0	0.14	0.14	0.28	0	0	0.13	0.13	24	8	0.275862
2017-06-25	7	16	uninoc	Recipient 4	D	8	2	0	1	0	1	na	0.17	0	0.17	0.33	0	0.1	0.1	0.2	10	4	0.333333
2017-06-25	7	30	SBPV	SBPV	D	16	0	na	0	0	0	1	0	na	0.06	0.06	0	na	0.27	0.27	22	1	0.0588235
2017-06-25	7	28	Crithidia	Crithidia	E	8	na	2	1	na	na	na	na	0.18	0.09	0.27	na	0	0	0	8	3	0.272727
2017-06-25	7	19	uninoc	Recipient 1	E	14	0	0	na	na	na	na	0	0	0	0	0.06	0.12	na	0.18	17	0	0
2017-06-25	7	35	SBPV	SBPV	E	10	0	na	2	na	na	na	0	na	0.17	0.17	0.17	na	0	0.17	12	2	0.166667
2017-06-25	7	22	Crithidia	Crithidia	F	8	na	0	0	0	0	0	na	0	0	0	na	0	0	0.5	16	0	0
2017-06-25	7	3	uninoc	Recipient 1	F	10	3	0	na	2	2	0	0.18	0	0.24	0.41	0	0	0	0	10	7	0.411765
2017-06-25	7	17	uninoc	Recipient 2	F	7	1	0	0	na	0	0	0.13	0	0	0.13	0	0.1	0.2	0.3	10	1	0.125
2017-06-25	7	23	uninoc	Recipient 3	F	6	4	0	0	0	na	2	0.33	0	0.17	0.5	0	0	0.25	0.25	8	6	0.5
2017-06-25	7	26	uninoc	Recipient 4	F	7	0	0	0	0	0	na	0	0	0	0	0	0	0.22	0.22	9	0	0
2017-06-25	7	24	SBPV	SBPV	F	13	0	na	0	1	0	0	0	na	0.07	0.07	0	na	0	0	13	1	0.0714286
2017-06-27	8	9	Crithidia	Crithidia	A	13	na	0	1	na	na	na	na	0	0.07	0.07	na	0.07	0	0.07	14	1	0.0714286
2017-06-27	8	20	uninoc	Recipient 1	A	20	0	0	na	na	na	na	0	0	0	0	0.05	0	na	0.05	21	0	0
2017-06-27	8	8	SBPV	SBPV	A	8	1	na	0	na	na	na	0.11	na	0	0.11	0	na	0	0	8	1	0.111111
2017-06-27	8	7	Crithidia	Crithidia	B	15	na	0	2	0	1	0	na	0	0.17	0.17	na	0	0.21	0.32	22	3	0.166667
2017-06-27	8	4	uninoc	Recipient 1	B	5	5	1	na	1	0	1	0.38	0.08	0.15	0.62	0.2	0	0.3	0.5	10	8	0.615385
2017-06-27	8	5	uninoc	Recipient 2	B	9	0	2	0	na	3	1	0	0.13	0.27	0.4	0	0	0.36	0.36	14	6	0.4
2017-06-27	8	37	uninoc	Recipient 3	B	10	1	0	1	0	na	0	0.08	0	0.08	0.17	0.07	0	0.21	0.29	14	2	0.166667
2017-06-27	8	12	uninoc	Recipient 4	B	10	1	1	2	4	0	na	0.06	0.06	0.33	0.44	0	0	0.17	0.17	12	8	0.444444
2017-06-27	8	32	SBPV	SBPV	B	10	0	na	0	0	0	0	0	na	0	0	0	na	0.29	0.29	14	0	0
2017-06-27	8	6	Crithidia	Crithidia	C	13	na	0	0	na	na	na	na	0	0	0	na	0.13	0	0.13	15	0	0
2017-06-27	8	10	uninoc	Recipient 1	C	18	0	2	na	na	na	na	0	0.1	0	0.1	0	0.05	na	0.05	19	2	0.1
2017-06-27	8	11	SBPV	SBPV	C	16	2	na	1	na	na	na	0.11	na	0.05	0.16	0	na	0.11	0.11	18	3	0.157895
2017-06-27	8	29	Crithidia	Crithidia	D	18	na	1	0	0	0	0	na	0.05	0	0.05	na	0	0.21	0.05	19	1	0.0526316
2017-06-27	8	13	uninoc	Recipient 1	D	7	0	1	na	0	0	0	0	0.13	0	0.13	0	0	0.22	0.22	9	1	0.125
2017-06-27	8	14	uninoc	Recipient 2	D	8	1	0	0	na	0	1	0.1	0	0.1	0.2	0	0	0	0	8	2	0.2
2017-06-27	8	15	uninoc	Recipient 3	D	25	0	3	0	0	na	3	0	0.1	0.1	0.19	0	0	0.04	0.04	26	6	0.193548
2017-06-27	8	16	uninoc	Recipient 4	D	10	0	1	2	0	1	na	0	0.07	0.21	0.29	0	0.07	0.27	0.33	15	4	0.285714
2017-06-27	8	30	SBPV	SBPV	D	15	0	na	0	0	0	1	0	na	0.06	0.06	0.05	na	0.24	0.29	21	1	0.0625
2017-06-27	8	28	Crithidia	Crithidia	E	13	na	0	0	na	na	na	na	0	0	0	na	0.07	0	0.07	14	0	0
2017-06-27	8	19	uninoc	Recipient 1	E	15	0	1	na	na	na	na	0	0.06	0	0.06	0	0	na	0	15	1	0.0625
2017-06-27	8	35	SBPV	SBPV	E	12	1	na	0	na	na	na	0.08	na	0	0.08	0	na	0.08	0.08	13	1	0.0769231
2017-06-27	8	22	Crithidia	Crithidia	F	10	na	0	0	0	0	0	na	0	0	0	na	0	0	0.38	16	0	0
2017-06-27	8	3	uninoc	Recipient 1	F	9	2	0	na	0	0	1	0.17	0	0.08	0.25	0	0	0	0	9	3	0.25
2017-06-27	8	17	uninoc	Recipient 2	F	8	1	0	0	na	0	1	0.1	0	0.1	0.2	0	0.1	0.1	0.2	10	2	0.2
2017-06-27	8	23	uninoc	Recipient 3	F	9	3	0	0	1	na	1	0.21	0	0.14	0.36	0	0	0	0	9	5	0.357143
2017-06-27	8	26	uninoc	Recipient 4	F	8	0	0	0	0	0	na	0	0	0	0	0	0	0.27	0.27	11	0	0
2017-06-27	8	24	SBPV	SBPV	F	14	0	na	0	1	0	0	0	na	0.07	0.07	0	na	0	0	14	1	0.0666667
2017-06-29	9	9	Crithidia	Crithidia	A	11	na	0	0	na	na	na	na	0	0	0	na	0.08	0	0.08	12	0	0
2017-06-29	9	20	uninoc	Recipient 1	A	18	0	0	na	na	na	na	0	0	0	0	0	0	na	0	18	0	0
2017-06-29	9	8	SBPV	SBPV	A	7	1	na	0	na	na	na	0.13	na	0	0.13	0	na	0	0	7	1	0.125
2017-06-29	9	7	Crithidia	Crithidia	B	17	na	0	2	0	1	0	na	0	0.15	0.15	na	0	0.19	0.06	18	3	0.15
2017-06-29	9	4	uninoc	Recipient 1	B	6	1	1	na	1	0	0	0.11	0.11	0.11	0.33	0.2	0	0.2	0.4	10	3	0.333333
2017-06-29	9	5	uninoc	Recipient 2	B	5	0	1	0	na	2	1	0	0.11	0.33	0.44	0	0.09	0.45	0.55	11	4	0.444444
2017-06-29	9	37	uninoc	Recipient 3	B	7	0	0	1	0	na	0	0	0	0.13	0.13	0.1	0	0.2	0.3	10	1	0.125
2017-06-29	9	12	uninoc	Recipient 4	B	7	0	2	1	4	0	na	0	0.14	0.36	0.5	0	0.11	0.11	0.22	9	7	0.5
2017-06-29	9	32	SBPV	SBPV	B	8	0	na	0	1	0	1	0	na	0.2	0.2	0	na	0.33	0.33	12	2	0.2
2017-06-29	9	6	Crithidia	Crithidia	C	13	na	1	0	na	na	na	na	0.07	0	0.07	na	0.07	0	0.07	14	1	0.0714286
2017-06-29	9	10	uninoc	Recipient 1	C	20	0	2	na	na	na	na	0	0.09	0	0.09	0	0	na	0	20	2	0.0909091
2017-06-29	9	11	SBPV	SBPV	C	12	1	na	0	na	na	na	0.08	na	0	0.08	0.07	na	0.13	0.2	15	1	0.0769231
2017-06-29	9	29	Crithidia	Crithidia	D	17	na	0	0	0	0	0	na	0	0	0	na	0	0.23	0.11	19	0	0
2017-06-29	9	13	uninoc	Recipient 1	D	9	0	0	na	0	0	0	0	0	0	0	0	0	0.1	0.1	10	0	0
2017-06-29	9	14	uninoc	Recipient 2	D	4	2	2	0	na	0	1	0.22	0.22	0.11	0.56	0	0.17	0.17	0.33	6	5	0.555556
2017-06-29	9	15	uninoc	Recipient 3	D	14	0	2	1	0	na	1	0	0.11	0.11	0.22	0	0.07	0	0.07	15	4	0.222222
2017-06-29	9	16	uninoc	Recipient 4	D	10	0	1	0	1	0	na	0	0.08	0.08	0.17	0	0.08	0.15	0.23	13	2	0.166667
2017-06-29	9	30	SBPV	SBPV	D	23	0	na	0	1	1	1	0	na	0.12	0.12	0	na	0.18	0.18	28	3	0.115385
2017-06-29	9	28	Crithidia	Crithidia	E	8	na	0	2	na	na	na	na	0	0.2	0.2	na	0	0.11	0.11	9	2	0.2
2017-06-29	9	19	uninoc	Recipient 1	E	14	1	1	na	na	na	na	0.06	0.06	0	0.13	0.12	0.06	na	0.18	17	2	0.125
2017-06-29	9	35	SBPV	SBPV	E	7	0	na	1	na	na	na	0	na	0.13	0.13	0	na	0.13	0.13	8	1	0.125
2017-06-29	9	22	Crithidia	Crithidia	F	6	na	1	0	1	0	0	na	0.13	0.13	0.25	na	0	0.13	0.33	9	2	0.25
2017-06-29	9	3	uninoc	Recipient 1	F	6	0	0	na	1	0	1	0	0	0.25	0.25	0	0	0	0	6	2	0.25
2017-06-29	9	17	uninoc	Recipient 2	F	13	1	1	0	na	0	1	0.06	0.06	0.06	0.19	0.06	0.06	0.12	0.24	17	3	0.1875
2017-06-29	9	23	uninoc	Recipient 3	F	9	2	0	0	0	na	1	0.17	0	0.08	0.25	0	0	0	0	9	3	0.25
2017-06-29	9	26	uninoc	Recipient 4	F	18	0	0	0	1	0	na	0	0	0.05	0.05	0	0	0.14	0.14	21	1	0.0526316
2017-06-29	9	24	SBPV	SBPV	F	15	0	na	0	1	0	0	0	na	0.06	0.06	0.06	na	0.06	0.12	17	1	0.0625
2017-07-01	10	9	Crithidia	Crithidia	A	12	na	0	1	na	na	na	na	0	0.08	0.08	na	0.08	0	0.08	13	1	0.0769231
2017-07-01	10	20	uninoc	Recipient 1	A	18	0	0	na	na	na	na	0	0	0	0	0.05	0.1	na	0.14	21	0	0
2017-07-01	10	8	SBPV	SBPV	A	6	1	na	2	na	na	na	0.11	na	0.22	0.33	0	na	0	0	6	3	0.333333
2017-07-01	10	7	Crithidia	Crithidia	B	18	na	0	3	0	0	0	na	0	0.14	0.14	na	0	0.18	0.1	20	3	0.142857
2017-07-01	10	4	uninoc	Recipient 1	B	16	1	0	na	2	0	0	0.05	0	0.11	0.16	0.13	0	0.17	0.3	23	3	0.157895
2017-07-01	10	5	uninoc	Recipient 2	B	8	0	2	0	na	2	1	0	0.15	0.23	0.38	0	0	0.43	0.43	14	5	0.384615
2017-07-01	10	37	uninoc	Recipient 3	B	10	1	0	1	0	na	0	0.08	0	0.08	0.17	0	0	0.29	0.29	14	2	0.166667
2017-07-01	10	12	uninoc	Recipient 4	B	9	0	2	3	4	2	na	0	0.1	0.45	0.55	0	0	0.1	0.1	10	11	0.55
2017-07-01	10	32	SBPV	SBPV	B	9	0	na	0	0	0	0	0	na	0	0	0	na	0.31	0.31	13	0	0
2017-07-01	10	6	Crithidia	Crithidia	C	16	na	0	0	na	na	na	na	0	0	0	na	0.06	0.06	0.11	18	0	0
2017-07-01	10	10	uninoc	Recipient 1	C	16	1	2	na	na	na	na	0.05	0.11	0	0.16	0	0	na	0	16	3	0.157895
2017-07-01	10	11	SBPV	SBPV	C	15	1	na	0	na	na	na	0.06	na	0	0.06	0	na	0.12	0.12	17	1	0.0625
2017-07-01	10	29	Crithidia	Crithidia	D	15	na	0	1	0	0	0	na	0	0.06	0.06	na	0	0.32	0.12	17	1	0.0625
2017-07-01	10	13	uninoc	Recipient 1	D	6	0	0	na	0	0	0	0	0	0	0	0.1	0	0.3	0.4	10	0	0
2017-07-01	10	14	uninoc	Recipient 2	D	5	1	1	0	na	1	1	0.11	0.11	0.22	0.44	0	0	0.17	0.17	6	4	0.444444
2017-07-01	10	15	uninoc	Recipient 3	D	21	1	5	2	0	na	2	0.03	0.16	0.13	0.32	0	0.04	0.12	0.16	25	10	0.322581
2017-07-01	10	16	uninoc	Recipient 4	D	13	0	1	1	1	2	na	0	0.06	0.22	0.28	0	0.06	0.18	0.24	17	5	0.277778
2017-07-01	10	30	SBPV	SBPV	D	24	0	na	0	0	1	1	0	na	0.08	0.08	0	na	0.23	0.23	31	2	0.0769231
2017-07-01	10	28	Crithidia	Crithidia	E	9	na	0	3	na	na	na	na	0	0.25	0.25	na	0.1	0	0.1	10	3	0.25
2017-07-01	10	19	uninoc	Recipient 1	E	18	0	0	na	na	na	na	0	0	0	0	0.14	0	na	0.14	21	0	0
2017-07-01	10	35	SBPV	SBPV	E	8	1	na	0	na	na	na	0.11	na	0	0.11	0	na	0	0	8	1	0.111111
2017-07-01	10	22	Crithidia	Crithidia	F	8	na	0	0	0	0	0	na	0	0	0	na	0	0	0.33	12	0	0
2017-07-01	10	3	uninoc	Recipient 1	F	5	0	0	na	1	0	2	0	0	0.38	0.38	0	0	0	0	5	3	0.375
2017-07-01	10	17	uninoc	Recipient 2	F	15	1	0	0	na	0	0	0.06	0	0	0.06	0	0	0.06	0.06	16	1	0.0625
2017-07-01	10	23	uninoc	Recipient 3	F	8	2	0	0	0	na	1	0.18	0	0.09	0.27	0	0	0	0	8	3	0.272727
2017-07-01	10	26	uninoc	Recipient 4	F	18	1	0	0	0	0	na	0.05	0	0	0.05	0	0	0.14	0.14	21	1	0.0526316
2017-07-01	10	24	SBPV	SBPV	F	23	0	na	0	0	0	0	0	na	0	0	0	na	0	0	23	0	0
2017-07-03	11	9	Crithidia	Crithidia	A	9	na	0	1	na	na	na	na	0	0.1	0.1	na	0	0	0	9	1	0.1
2017-07-03	11	20	uninoc	Recipient 1	A	13	0	0	na	na	na	na	0	0	0	0	0.06	0.13	na	0.19	16	0	0
2017-07-03	11	8	SBPV	SBPV	A	6	0	na	2	na	na	na	0	na	0.25	0.25	0	na	0	0	6	2	0.25
2017-07-03	11	7	Crithidia	Crithidia	B	12	na	0	3	0	0	0	na	0	0.2	0.2	na	0	0.2	0.2	15	3	0.2
2017-07-03	11	4	uninoc	Recipient 1	B	12	1	1	na	1	0	0	0.07	0.07	0.07	0.2	0.18	0	0.12	0.29	17	3	0.2
2017-07-03	11	5	uninoc	Recipient 2	B	14	0	0	0	na	2	2	0	0	0.22	0.22	0	0	0.26	0.26	19	4	0.222222
2017-07-03	11	37	uninoc	Recipient 3	B	14	0	0	0	0	na	0	0	0	0	0	0	0	0.18	0.18	17	0	0
2017-07-03	11	12	uninoc	Recipient 4	B	8	2	2	2	4	1	na	0.11	0.11	0.37	0.58	0	0	0.2	0.2	10	11	0.578947
2017-07-03	11	32	SBPV	SBPV	B	10	0	na	0	0	0	0	0	na	0	0	0	na	0.23	0.23	13	0	0
2017-07-03	11	6	Crithidia	Crithidia	C	14	na	0	0	na	na	na	na	0	0	0	na	0	0.07	0.07	15	0	0
2017-07-03	11	10	uninoc	Recipient 1	C	14	1	4	na	na	na	na	0.05	0.21	0	0.26	0	0	na	0	14	5	0.263158
2017-07-03	11	11	SBPV	SBPV	C	14	0	na	0	na	na	na	0	na	0	0	0	na	0.22	0.22	18	0	0
2017-07-03	11	29	Crithidia	Crithidia	D	12	na	0	0	0	0	0	na	0	0	0	na	0	0.33	0	12	0	0
2017-07-03	11	13	uninoc	Recipient 1	D	4	0	1	na	0	0	0	0	0.2	0	0.2	0	0	0.2	0.2	5	1	0.2
2017-07-03	11	14	uninoc	Recipient 2	D	4	0	2	0	na	2	1	0	0.22	0.33	0.56	0	0	0	0	4	5	0.555556
2017-07-03	11	15	uninoc	Recipient 3	D	19	0	3	0	0	na	1	0	0.13	0.04	0.17	0	0	0.14	0.14	22	4	0.173913
2017-07-03	11	16	uninoc	Recipient 4	D	4	0	0	1	0	1	na	0	0	0.33	0.33	0	0.14	0.29	0.43	7	2	0.333333
2017-07-03	11	30	SBPV	SBPV	D	24	0	na	0	0	0	1	0	na	0.04	0.04	0	na	0.2	0	24	1	0.04
2017-07-03	11	28	Crithidia	Crithidia	E	14	na	0	2	na	na	na	na	0	0.13	0.13	na	0	0	0	14	2	0.125
2017-07-03	11	19	uninoc	Recipient 1	E	12	0	0	na	na	na	na	0	0	0	0	0.14	0	na	0.14	14	0	0
2017-07-03	11	35	SBPV	SBPV	E	8	0	na	0	na	na	na	0	na	0	0	0	na	0	0	8	0	0
2017-07-03	11	22	Crithidia	Crithidia	F	8	na	0	0	1	0	0	na	0	0.11	0.11	na	0	0.11	0.2	10	1	0.111111
2017-07-03	11	3	uninoc	Recipient 1	F	0	0	0	na	1	0	1	0								0	2	1
2017-07-03	11	17	uninoc	Recipient 2	F	10	1	1	0	na	0	1	0.08	0.08	0.08	0.23	0.08	0	0.08	0.17	12	3	0.230769
2017-07-03	11	23	uninoc	Recipient 3	F	5	0	0	0	0	na	2	0	0	0.29	0.29	0	0	0	0	5	2	0.285714
2017-07-03	11	26	uninoc	Recipient 4	F	14	1	0	0	0	0	na	0.07	0	0	0.07	0	0	0.22	0.22	18	1	0.0666667
2017-07-03	11	24	SBPV	SBPV	F	18	0	na	0	0	0	0	0	na	0	0	0	na	0.05	0.05	19	0	0
2017-07-05	12	9	Crithidia	Crithidia	A	11	na	0	1	na	na	na	na	0	0.08	0.08	na	0.08	0	0.08	12	1	0.0833333
2017-07-05	12	20	uninoc	Recipient 1	A	18	0	0	na	na	na	na	0	0	0	0	0.05	0.05	na	0.1	20	0	0
2017-07-05	12	8	SBPV	SBPV	A	7	1	na	1	na	na	na	0.11	na	0.11	0.22	0	na	0	0	7	2	0.222222
2017-07-05	12	7	Crithidia	Crithidia	B	13	na	0	3	1	0	0	na	0	0.24	0.24	na	0.07	0.13	0.13	15	4	0.235294
2017-07-05	12	4	uninoc	Recipient 1	B	11	1	1	na	0	0	0	0.08	0.08	0	0.15	0.17	0	0.22	0.39	18	2	0.153846
2017-07-05	12	5	uninoc	Recipient 2	B	12	0	0	1	na	3	0	0	0	0.25	0.25	0.06	0	0.28	0.33	18	4	0.25
2017-07-05	12	37	uninoc	Recipient 3	B	13	0	0	0	0	na	0	0	0	0	0	0	0	0.19	0.19	16	0	0
2017-07-05	12	12	uninoc	Recipient 4	B	8	0	1	3	5	0	na	0	0.06	0.47	0.53	0	0	0	0	8	9	0.529412
2017-07-05	12	32	SBPV	SBPV	B	9	1	na	0	0	0	0	0.1	na	0	0.1	0	na	0.18	0.18	11	1	0.1
2017-07-05	12	6	Crithidia	Crithidia	C	16	na	1	0	na	na	na	na	0.06	0	0.06	na	0.06	0	0.06	17	1	0.0588235
2017-07-05	12	10	uninoc	Recipient 1	C	14	0	4	na	na	na	na	0	0.22	0	0.22	0	0	na	0	14	4	0.222222
2017-07-05	12	11	SBPV	SBPV	C	14	1	na	0	na	na	na	0.07	na	0	0.07	0.05	na	0.21	0.26	19	1	0.0666667
2017-07-05	12	29	Crithidia	Crithidia	D	13	na	0	0	0	0	0	na	0	0	0	na	0	0.41	0.07	14	0	0
2017-07-05	12	13	uninoc	Recipient 1	D	2	0	2	na	0	3	0	0	0.29	0.43	0.71	0	0.2	0.4	0.6	5	5	0.714286
2017-07-05	12	14	uninoc	Recipient 2	D	4	0	0	0	na	0	1	0	0	0.2	0.2	0	0	0.2	0.2	5	1	0.2
2017-07-05	12	15	uninoc	Recipient 3	D	13	1	4	0	0	na	0	0.06	0.22	0	0.28	0	0	0.28	0.28	18	5	0.277778
2017-07-05	12	16	uninoc	Recipient 4	D	6	0	3	2	1	2	na	0	0.21	0.36	0.57	0	0.13	0.13	0.25	8	8	0.571429
2017-07-05	12	30	SBPV	SBPV	D	25	0	na	1	0	0	1	0	na	0.07	0.07	0	na	0.26	0.04	26	2	0.0740741
2017-07-05	12	28	Crithidia	Crithidia	E	15	na	0	2	na	na	na	na	0	0.12	0.12	na	0	0	0	15	2	0.117647
2017-07-05	12	19	uninoc	Recipient 1	E	14	0	0	na	na	na	na	0	0	0	0	0.13	0	na	0.13	16	0	0
2017-07-05	12	35	SBPV	SBPV	E	7	0	na	0	na	na	na	0	na	0	0	0	na	0	0	7	0	0
2017-07-05	12	22	Crithidia	Crithidia	F	6	na	0	0	0	0	1	na	0	0.14	0.14	na	0	0.14	0.14	7	1	0.142857
2017-07-05	12	3	uninoc	Recipient 1	F	0	0	0	na	1	0	1	0	0	1	1	0	0	1	1	1	2	1
2017-07-05	12	17	uninoc	Recipient 2	F	4	1	0	0	na	0	1	0.17	0	0.17	0.33	0	0	0.2	0.2	5	2	0.333333
2017-07-05	12	23	uninoc	Recipient 3	F	3	0	0	0	0	na	1	0	0	0.25	0.25	0	0	0	0	3	1	0.25
2017-07-05	12	26	uninoc	Recipient 4	F	12	0	1	1	0	0	na	0	0.07	0.07	0.14	0.06	0	0.19	0.25	16	2	0.142857
2017-07-05	12	24	SBPV	SBPV	F	18	0	na	0	0	0	0	0	na	0	0	0	na	0.05	0.05	19	0	0
2017-07-06	12.5	9	Crithidia	Crithidia	A	10	na	0	0	na	na	na	na	0	0	0	na	0	0	0	10	0	0
2017-07-06	12.5	20	uninoc	Recipient 1	A	12	0	0	na	na	na	na	0	0	0	0	0	0	na	0	12	0	0
2017-07-06	12.5	8	SBPV	SBPV	A	4	0	na	0	na	na	na	0	na	0	0	0	na	0	0	4	0	0
2017-07-06	12.5	7	Crithidia	Crithidia	B	12	na	0	3	0	0	0	na	0	0.2	0.2	na	0.08	0.2	0.08	13	3	0.2
2017-07-06	12.5	4	uninoc	Recipient 1	B	7	0	1	na	2	0	0	0	0.1	0.2	0.3	0.25	0	0.17	0.42	12	3	0.3
2017-07-06	12.5	5	uninoc	Recipient 2	B	9	0	0	0	na	2	0	0	0	0.18	0.18	0	0	0.44	0.44	16	2	0.181818
2017-07-06	12.5	37	uninoc	Recipient 3	B	11	0	0	1	0	na	0	0	0	0.08	0.08	0	0	0.15	0.15	13	1	0.0833333
2017-07-06	12.5	12	uninoc	Recipient 4	B	7	0	2	1	5	0	na	0	0.13	0.4	0.53	0	0	0	0	7	8	0.533333
2017-07-06	12.5	32	SBPV	SBPV	B	8	1	na	0	0	0	0	0.11	na	0	0.11	0	na	0.27	0.27	11	1	0.111111
2017-07-06	12.5	6	Crithidia	Crithidia	C	12	na	1	0	na	na	na	na	0.08	0	0.08	na	0.14	0	0.14	14	1	0.0769231
2017-07-06	12.5	10	uninoc	Recipient 1	C	12	0	3	na	na	na	na	0	0.2	0	0.2	0	0	na	0	12	3	0.2
2017-07-06	12.5	11	SBPV	SBPV	C	12	2	na	0	na	na	na	0.14	na	0	0.14	0.06	na	0.19	0.25	16	2	0.142857
2017-07-06	12.5	29	Crithidia	Crithidia	D	9	na	0	0	0	0	0	na	0	0	0	na	0	0.47	0.1	10	0	0
2017-07-06	12.5	13	uninoc	Recipient 1	D	1	1	2	na	0	1	0	0.2	0.4	0.2	0.8	0	0.33	0.33	0.67	3	4	0.8
2017-07-06	12.5	14	uninoc	Recipient 2	D	1	0	2	0	na	2	1	0	0.33	0.5	0.83	0	0	0	0	1	5	0.833333
2017-07-06	12.5	15	uninoc	Recipient 3	D	12	0	2	0	0	na	0	0	0.14	0	0.14	0	0	0.25	0.25	16	2	0.142857
2017-07-06	12.5	16	uninoc	Recipient 4	D	4	0	2	1	0	1	na	0	0.25	0.25	0.5	0	0	0.2	0.2	5	4	0.5
2017-07-06	12.5	30	SBPV	SBPV	D	11	0	na	1	0	0	0	0	na	0.08	0.08	0	na	0.42	0.42	19	1	0.0833333
2017-07-06	12.5	28	Crithidia	Crithidia	E	6	na	0	3	na	na	na	na	0	0.33	0.33	na	0	0	0	6	3	0.333333
2017-07-06	12.5	19	uninoc	Recipient 1	E	14	0	1	na	na	na	na	0	0.07	0	0.07	0.18	0	na	0.18	17	1	0.0666667
2017-07-06	12.5	35	SBPV	SBPV	E	14	0	na	0	na	na	na	0	na	0	0	0	na	0.07	0.07	15	0	0
2017-07-06	12.5	22	Crithidia	Crithidia	F	3	na	0	0	1	0	1	na	0	0.4	0.4	na	0	0.25	0.5	6	2	0.4
2017-07-06	12.5	3	uninoc	Recipient 1	F	0	0	0	na	1	0	0	0	0	1	1	0	0	1	1	1	1	1
2017-07-06	12.5	17	uninoc	Recipient 2	F	1	0	0	0	na	0	1	0	0	0.5	0.5	0.33	0	0.33	0.67	3	1	0.5
2017-07-06	12.5	23	uninoc	Recipient 3	F	0	2	0	0	0	na	0	1								0	2	1
2017-07-06	12.5	26	uninoc	Recipient 4	F	13	1	1	1	0	0	na	0.06	0.06	0.06	0.19	0.07	0	0.07	0.13	15	3	0.1875
2017-07-06	12.5	24	SBPV	SBPV	F	12	0	na	0	0	0	0	0	na	0	0	0	na	0.08	0.08	13	0	0
2017-07-09	14	9	Crithidia	Crithidia	A	14	na	0	1	na	na	na	na	0	0.07	0.07	na	0	0	0	14	1	0.0666667
2017-07-09	14	20	uninoc	Recipient 1	A	11	0	0	na	na	na	na	0	0	0	0	0.08	0	na	0.08	12	0	0
2017-07-09	14	8	SBPV	SBPV	A	4	0	na	0	na	na	na	0	na	0	0	0	na	0	0	4	0	0
2017-07-09	14	7	Crithidia	Crithidia	B	10	na	0	3	0	1	0	na	0	0.29	0.29	na	0	0.17	0.17	12	4	0.285714
2017-07-09	14	4	uninoc	Recipient 1	B	12	0	1	na	1	0	0	0	0.07	0.07	0.14	0.18	0	0.06	0.29	17	2	0.142857
2017-07-09	14	5	uninoc	Recipient 2	B	16	0	0	0	na	0	0	0	0	0	0	0	0	0.24	0.24	21	0	0
2017-07-09	14	37	uninoc	Recipient 3	B	10	0	0	0	0	na	0	0	0	0	0	0.08	0	0.08	0.17	12	0	0
2017-07-09	14	12	uninoc	Recipient 4	B	4	1	1	1	4	1	na	0.08	0.08	0.5	0.67	0	0	0	0	4	8	0.666667
2017-07-09	14	32	SBPV	SBPV	B	12	1	na	1	0	0	0	0.07	na	0.07	0.14	0	na	0.14	0.14	14	2	0.142857
2017-07-09	14	6	Crithidia	Crithidia	C	15	na	1	0	na	na	na	na	0.06	0	0.06	na	0	0.06	0.06	16	1	0.0625
2017-07-09	14	10	uninoc	Recipient 1	C	14	1	4	na	na	na	na	0.05	0.21	0	0.26	0	0	na	0	14	5	0.263158
2017-07-09	14	11	SBPV	SBPV	C	13	0	na	0	na	na	na	0	na	0	0	0.06	na	0.22	0.28	18	0	0
2017-07-09	14	29	Crithidia	Crithidia	D	12	na	0	0	0	0	0	na	0	0	0	na	0	0.43	0.14	14	0	0
2017-07-09	14	13	uninoc	Recipient 1	D	1	0	2	na	0	0	0	0	0.67	0	0.67	0	0	0.33	0.67	3	2	0.666667
2017-07-09	14	14	uninoc	Recipient 2	D	2	0	1	0	na	0	2	0	0.2	0.4	0.6	0	0	0	0	2	3	0.6
2017-07-09	14	15	uninoc	Recipient 3	D	14	1	5	0	0	na	0	0.05	0.25	0	0.3	0	0	0	0.07	15	6	0.3
2017-07-09	14	16	uninoc	Recipient 4	D	3	0	1	1	0	0	na	0	0.2	0.2	0.4	0	0	0.4	0.4	5	2	0.4
2017-07-09	14	30	SBPV	SBPV	D	12	1	na	1	0	1	0	0.07	na	0.13	0.2	0	na	0.43	0.43	21	3	0.2
2017-07-09	14	28	Crithidia	Crithidia	E	10	na	0	5	na	na	na	na	0	0.33	0.33	na	0	0.09	0.09	11	5	0.333333
2017-07-09	14	19	uninoc	Recipient 1	E	10	1	0	na	na	na	na	0.09	0	0	0.09	0.31	0.06	na	0.38	16	1	0.0909091
2017-07-09	14	35	SBPV	SBPV	E	5	0	na	1	na	na	na	0	na	0.17	0.17	0	na	0	0	5	1	0.166667
2017-07-09	14	22	Crithidia	Crithidia	F	6	na	0	0	0	0	0	na	0	0	0	na	0	0.14	0.25	8	0	0
2017-07-09	14	3	uninoc	Recipient 1	F	0	0	0	na	1	0	0	0	0	1	1	0	0	1	1	1	1	1
2017-07-09	14	17	uninoc	Recipient 2	F	0	0	0	0	na	0	0	0								1	0	0
2017-07-09	14	23	uninoc	Recipient 3	F	0	1	0	0	0	na	0	1								0	1	1
2017-07-09	14	26	uninoc	Recipient 4	F	10	1	1	1	0	0	na	0.08	0.08	0.08	0.23	0	0	0	0	10	3	0.230769
2017-07-09	14	24	SBPV	SBPV	F	8	0	na	0	0	0	0	0	na	0	0	0	na	0.11	0.11	9	0	0
																						0	0
													MAX									11	1
													AVERAGE DRIFT									2.03	0.16

## Sheet: Bailesetal_datafile8_ESM
Colony numbers & treatments
	Crit col	SBPV col	Recipient 1	Recipient 2	Recipient 3	Recipient 4
A	9	8	20	na	na	na
B	7	32	4	5	37	12
C	6	11	10	na	na	na
D	29	30	13	14	15	16
E	28	35	19	na	na	na
F	22	24	3	17	23	26
Tag colours & treatments
	Crit col	SBPV col	Recipient 1	Recipient 2	Recipient 3	Recipient 4
A	TY	WI	OR	na	na	na
B	Y	WI	B	LI	TB	OR
C	OR	LI	B	na	na	na
D	WI	TG	BL	LI	OR	Y
E	BL	OR	Y	na	na	na
F	BL	LI	TY	Y	OR	WI

## Sheet: Bailesetal_datafile9_ESM.csv
tp	col	Bee	type	RTPCR_band_strength	comp	neg_strand
5	13	26	UNinoc	2	D	1
7	15	41	UNinoc	2	D	1
2	11	47	SBPV	3	C	1
0	32	4	SBPV	3	B	1
6	24	58	SBPV	3	F	1
0	30	22	SBPV	3	D	1
0	30	33	SBPV	3	D	1
7	16	32	UNinoc	4	D	1
1	24	35	SBPV	4	F	1
2	30	45	SBPV	4	D	1
3	30	54	SBPV	4	D	1
0	8	16	SBPV	4	A	1
7	8	17	SBPV	4	A	1
4	30	42	SBPV	4	D	1
6	30	53	SBPV	4	D	1
6	10	2	UNinoc	1	C	0
4	13	24	UNinoc	1	D	0
5	17	18	UNinoc	1	F	0
7	19	49	UNinoc	1	E	0
4	23	14	UNinoc	1	F	0
6	23	17	UNinoc	1	F	0
2	29	37	UNinoc	1	D	0
3	30	55	SBPV	1	D	0
6	32	47	SBPV	1	B	0
2	35	42	SBPV	1	E	0
7	13	14	UNinoc	2	D	0
7	14	2	UNinoc	2	D	0
1	15	1	UNinoc	2	D	0
7	15	5	UNinoc	2	D	0
5	15	10	UNinoc	2	D	0
5	15	46	UNinoc	2	D	0
7	16	38	UNinoc	2	D	0
6	17	43	UNinoc	2	F	0
7	20	17	UNinoc	2	A	0
1	22	31	UNinoc	2	F	0
7	26	27	UNinoc	2	F	0
7	8	24	SBPV	2	A	0
5	24	48	SBPV	2	F	0
6	24	68	SBPV	2	F	0
7	30	8	SBPV	2	D	0
1	30	39	SBPV	2	D	0
3	30	50	SBPV	2	D	0
7	30	51	SBPV	2	D	0
4	30	52	SBPV	2	D	0
6	30	68	SBPV	2	D	0
6	30	75	SBPV	2	D	0
6	30	76	SBPV	2	D	0
1	35	33	SBPV	2	E	0
7	16	19	UNinoc	3	D	0
6	17	48	UNinoc	3	F	0
7	29	22	UNinoc	3	D	0
0	8	2	SBPV	3	A	0
7	8	22	SBPV	3	A	0
1	8	26	SBPV	3	A	0
4	8	30	SBPV	3	A	0
1	8	31	SBPV	3	A	0
1	11	28	SBPV	3	C	0
0	24	3	SBPV	3	F	0
0	24	6	SBPV	3	F	0
5	24	51	SBPV	3	F	0
6	24	65	SBPV	3	F	0
6	24	66	SBPV	3	F	0
2	30	12	SBPV	3	D	0
2	30	20	SBPV	3	D	0
6	30	72	SBPV	3	D	0
7	30	77	SBPV	3	D	0
0	32	7	SBPV	3	B	0
0	32	9	SBPV	3	B	0
3	32	44	SBPV	3	B	0
0	35	31	SBPV	3	E	0
0	8	9	SBPV	4	A	0
0	24	22	SBPV	4	F	0
1	30	26	SBPV	4	D	0
1	35	46	SBPV	4	E	0
